# Supplementary material for: Stereoselective vinylogous Mannich reaction of 2-trimethylsilyloxyfuran with N-gulosyl nitrones
Source: Royal Society of Chemistry journal article supplement (doi:10.1039/c1ob06067h), 2011-01-01

**Supplementary Information**

**Stereoselective Vinylogous Mannich Reaction of  
2-Trimethylsilyloxyfuran with *N*-Gulosyl Nitrones**

**Osamu Tamura,\* Kodai Takeda, Naka Mita, Masanori Sakamoto,  
Iwao Okamoto, Nobuyoshi Morita, Hiroyuki Ishibashi**

**$^1\text{H}$  and  $^{13}\text{C}$  NMR Spectra**

iso-glo-lac

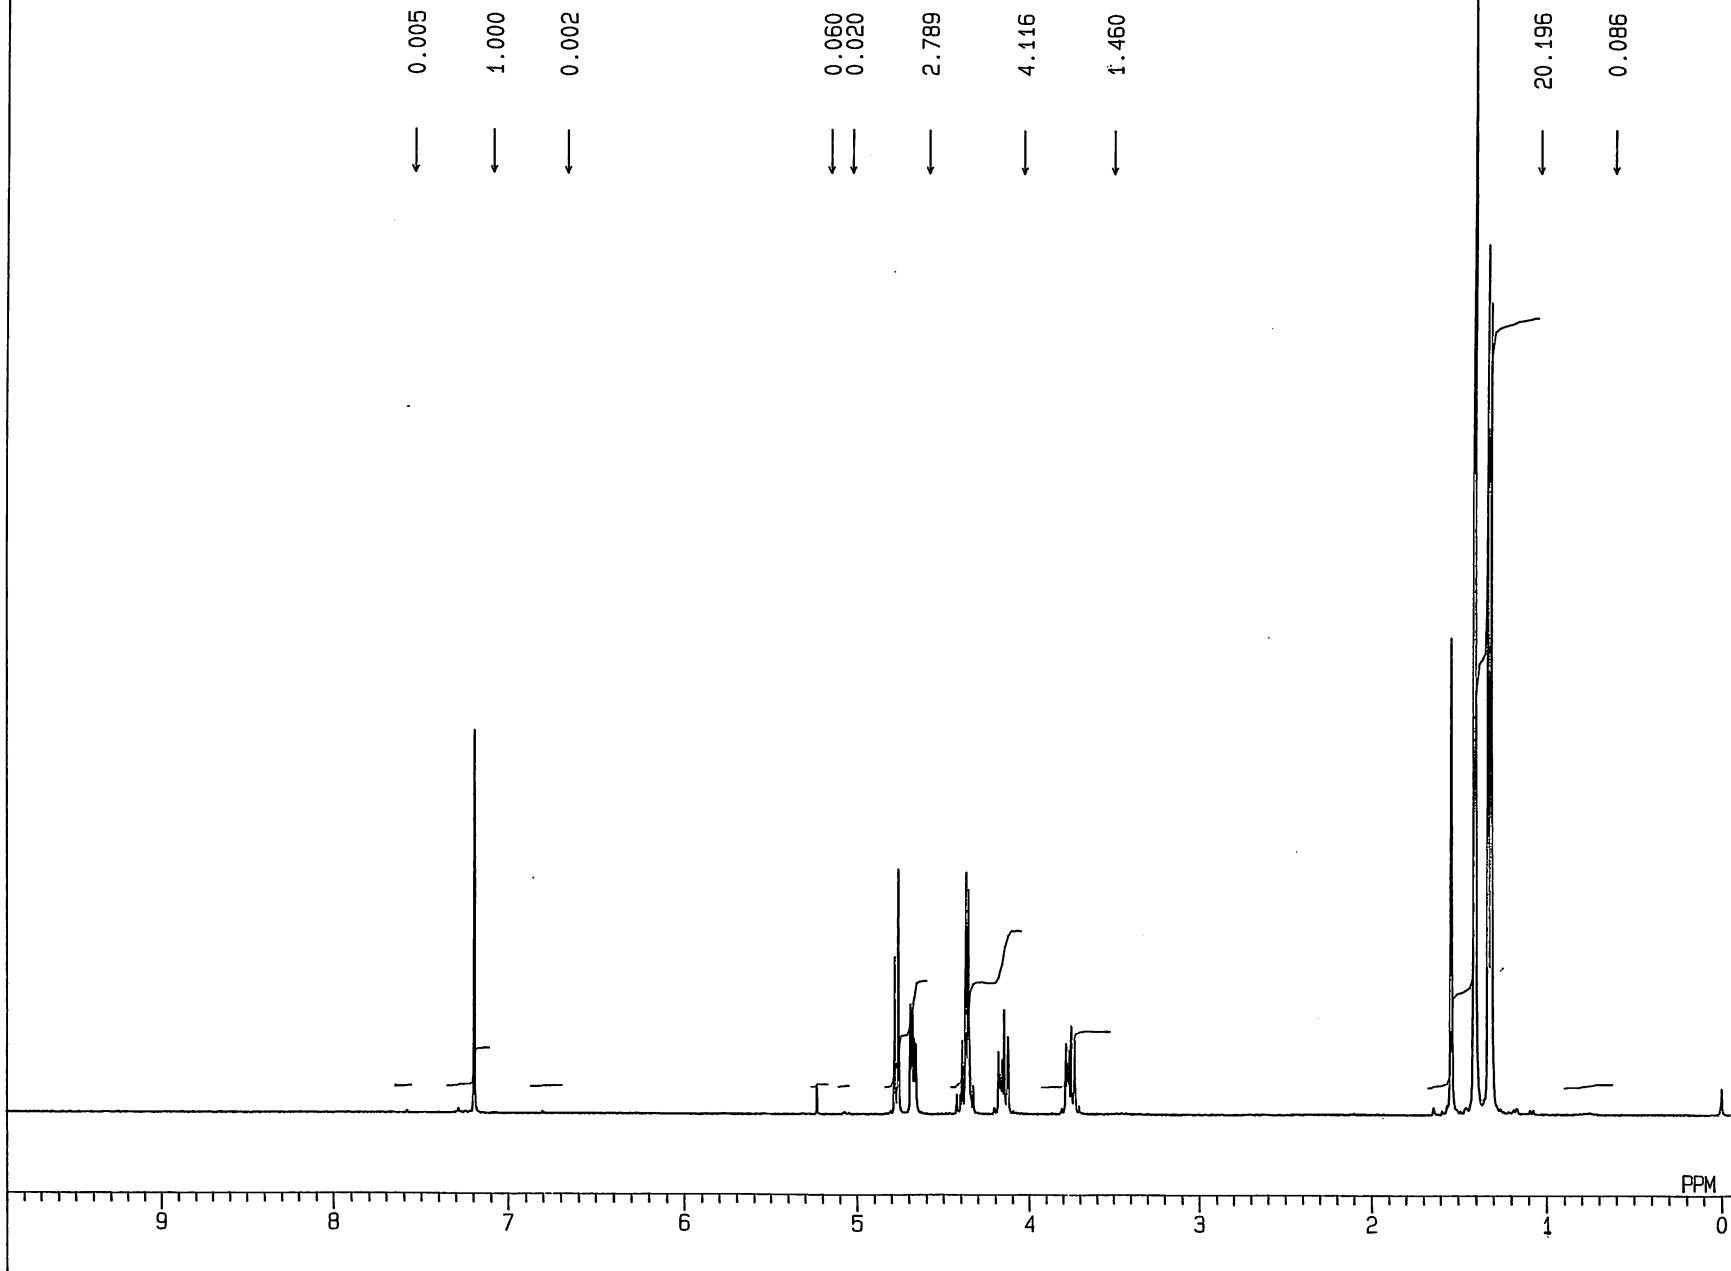

13-SEP-99 18:06:27  
DFILE Q1H  
OBNUC 1H  
EXMOD NON  
OFR 270.05 MHz  
OBSET 112.00 kHz  
OBFIN 5800.0 Hz  
POINT 32768  
FREQU 5405.4 Hz  
SCANS 16  
ACQTM 3.031 sec  
PD 3.969 sec  
PW1 5.5 us  
IRNUC 1H  
CTEMP 24.0 c  
SLVNT CDCL3  
EXREF 0.00 ppm  
BF 0.16 Hz  
RGAIN 19  
OPERATOR : \_\_\_\_\_

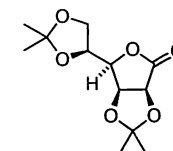

**2,3:5,6-O-Diisopropylidene-L-gulono-1,4-lactone**

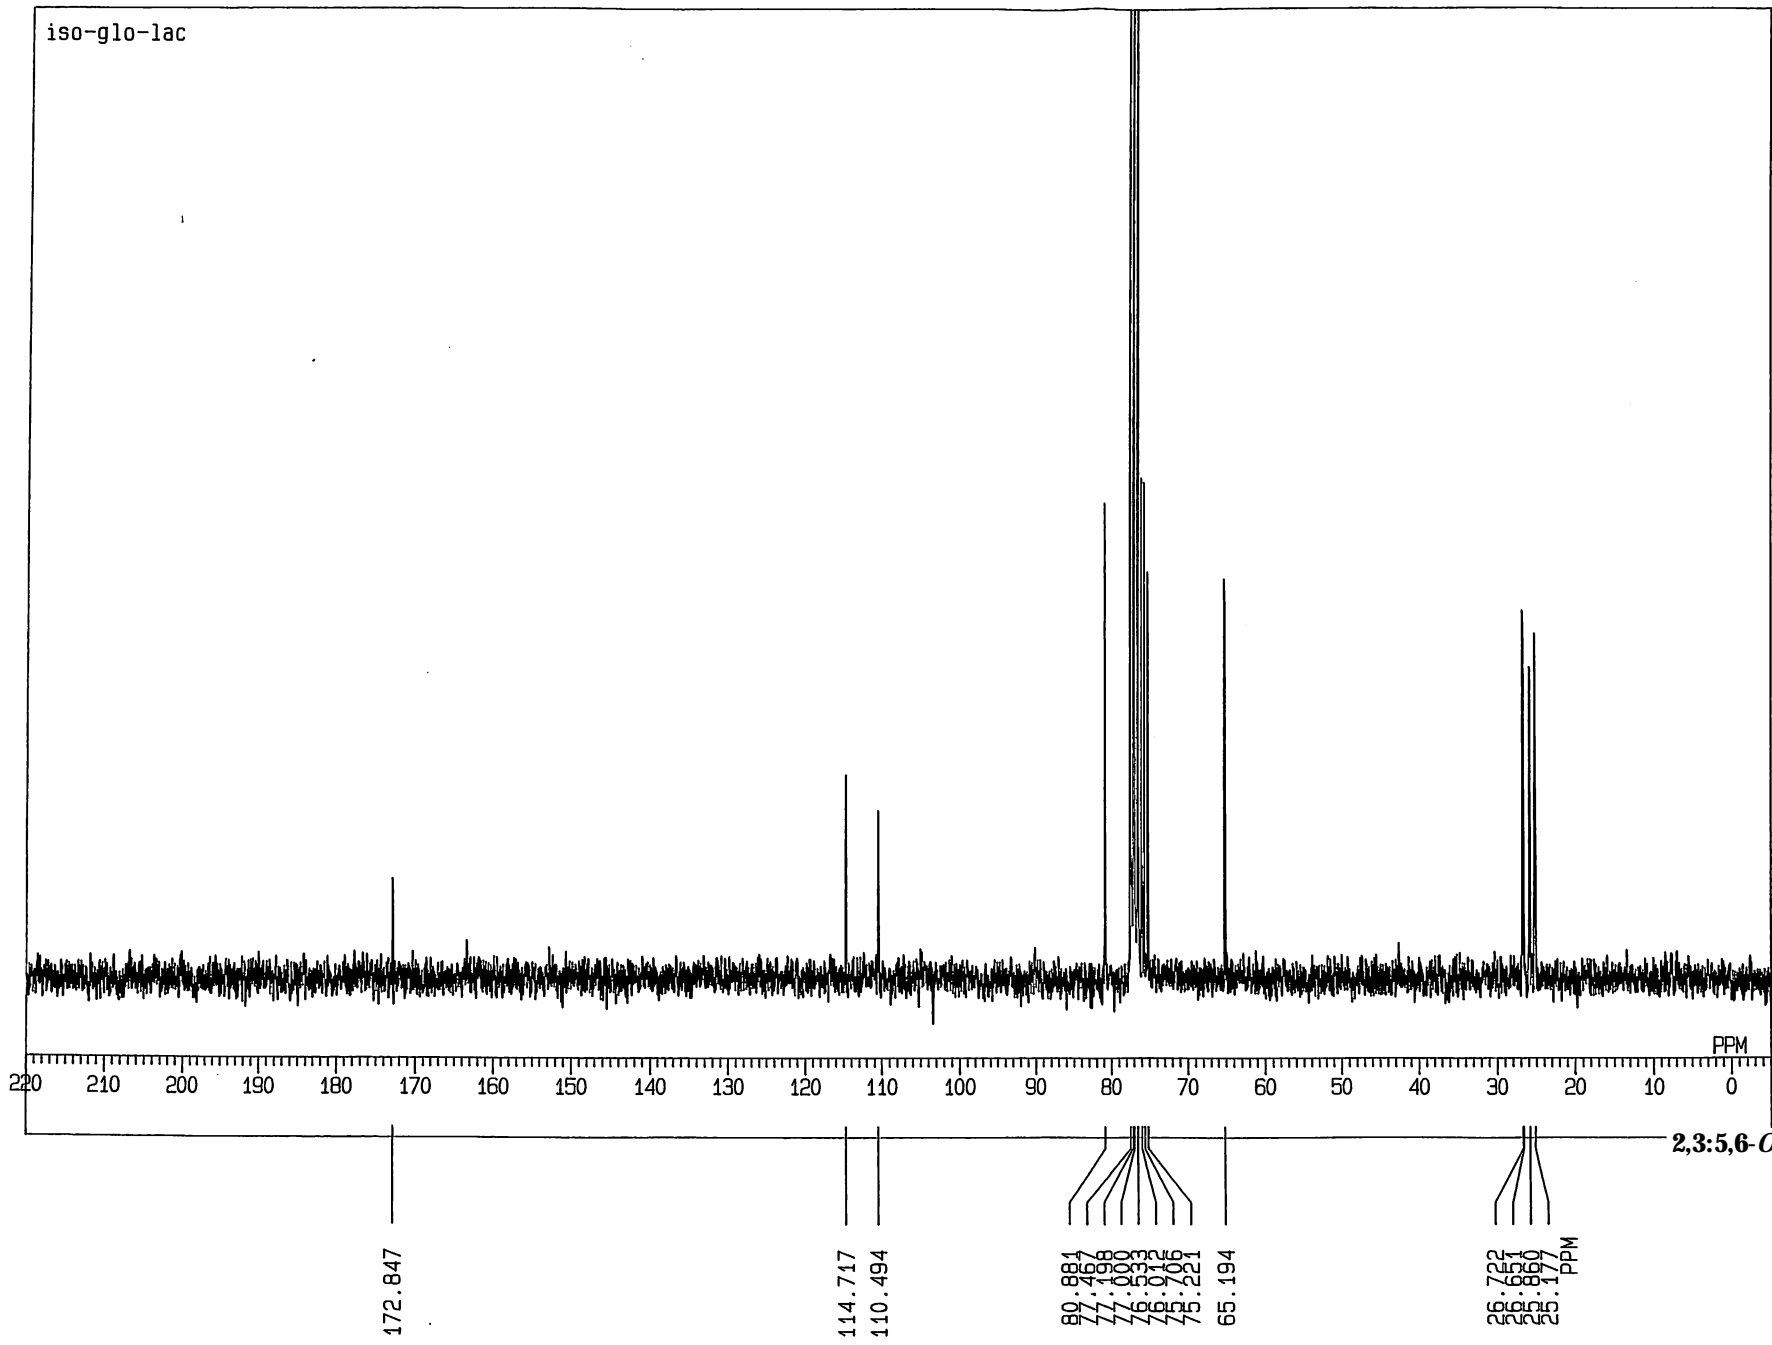

13-SEP-99 20: 06: 01  
DFILE Q13C  
OBNUC 13C  
EXMOD BCM  
OFR 67.80 MHz  
OBSET 135.00 kHz  
OBFIN 5200.0 Hz  
POINT 32768  
FREQU 20000.0 Hz  
SCANS 1604  
ACQTM 0.819 sec  
PD 2.181 sec  
PW1 4.3 us  
IRNUC 1H  
CTEMP 25.5 c  
SLVNT CDCL3  
EXREF 77.00 ppm  
BF 1.50 Hz  
RGAIN 30  
OPERATOR : \_\_\_\_\_

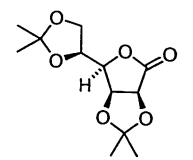

2,3:5,6-O-diisopropylidene-L-gulono-1,4-lactone

iso-glo-tol

0.006    1.000    0.027  
↓       ↓       ↓  
0.010    2.209    0.014    0.110  
↓       ↓       ↓       ↓  
11.139    2.532  
↓       ↓  
2.230    0.025    0.006  
↓       ↓       ↓  
30.828  
↓

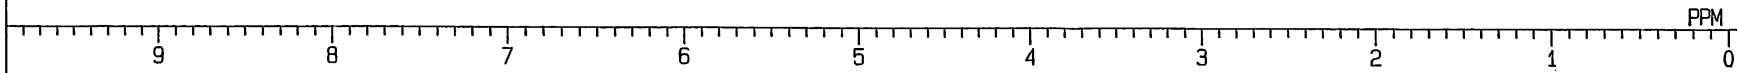

14-SEP-99 17: 53: 15  
DFILE Q1H  
OBNUC 1H  
EXMOD NON  
OFR        270.05 MHz  
OBSET     112.00 kHz  
OBFIN     5800.0 Hz  
POINT     32768  
FREQU     5405.4 Hz  
SCANS     16  
ACQTM     3.031 sec  
PD        3.969 sec  
PW1       5.5 us  
IRNUC 1H  
CTEMP     23.9 c  
SLVNT CDCL3  
EXREF     0.00 ppm  
BF        0.16 Hz  
RGAIN     18  
OPERATOR : \_\_\_\_\_

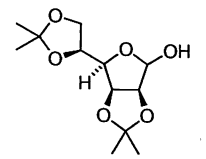

2,3:5,6-O-Diisopropylidene-L-gulofuranose

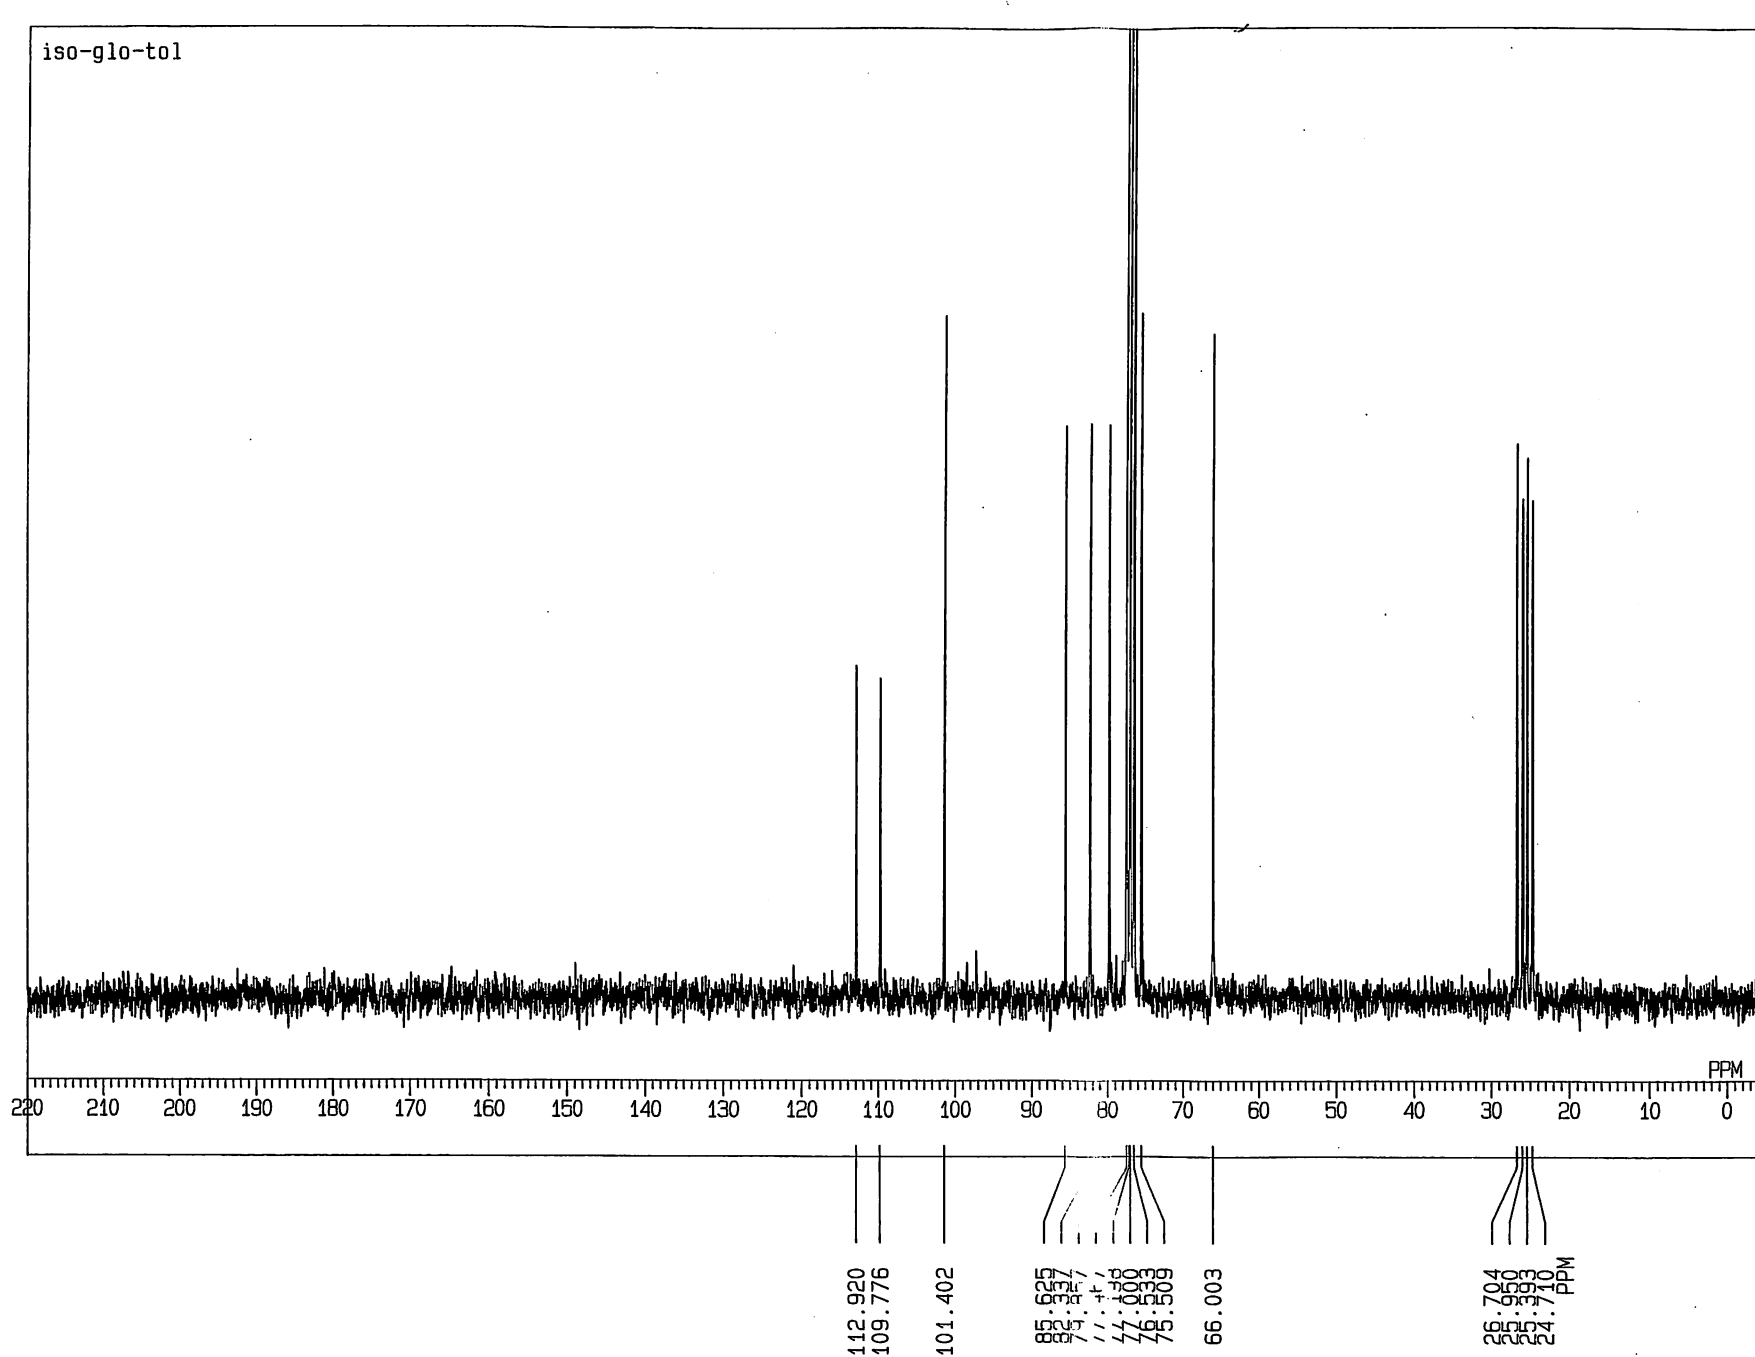

14-SEP-99 19: 58: 13  
DFILE Q13C  
OBNUC 13C  
EXMOD BCM  
OFR 67.80 MHz  
OBSET 135.00 kHz  
OBFIN 5200.0 Hz  
POINT 32768  
FREQU 20000.0 Hz  
SCANS 1597  
ACQTM 0.819 sec  
PD 2.181 sec  
PW1 4.3 us  
IRNUC 1H  
CTEMP 25.1 c  
SLVNT CDCL3  
EXREF 77.00 ppm  
BF 1.50 Hz  
RGAIN 30  
OPERATOR : \_\_\_\_\_

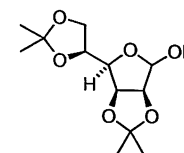

iso-glo-oxi

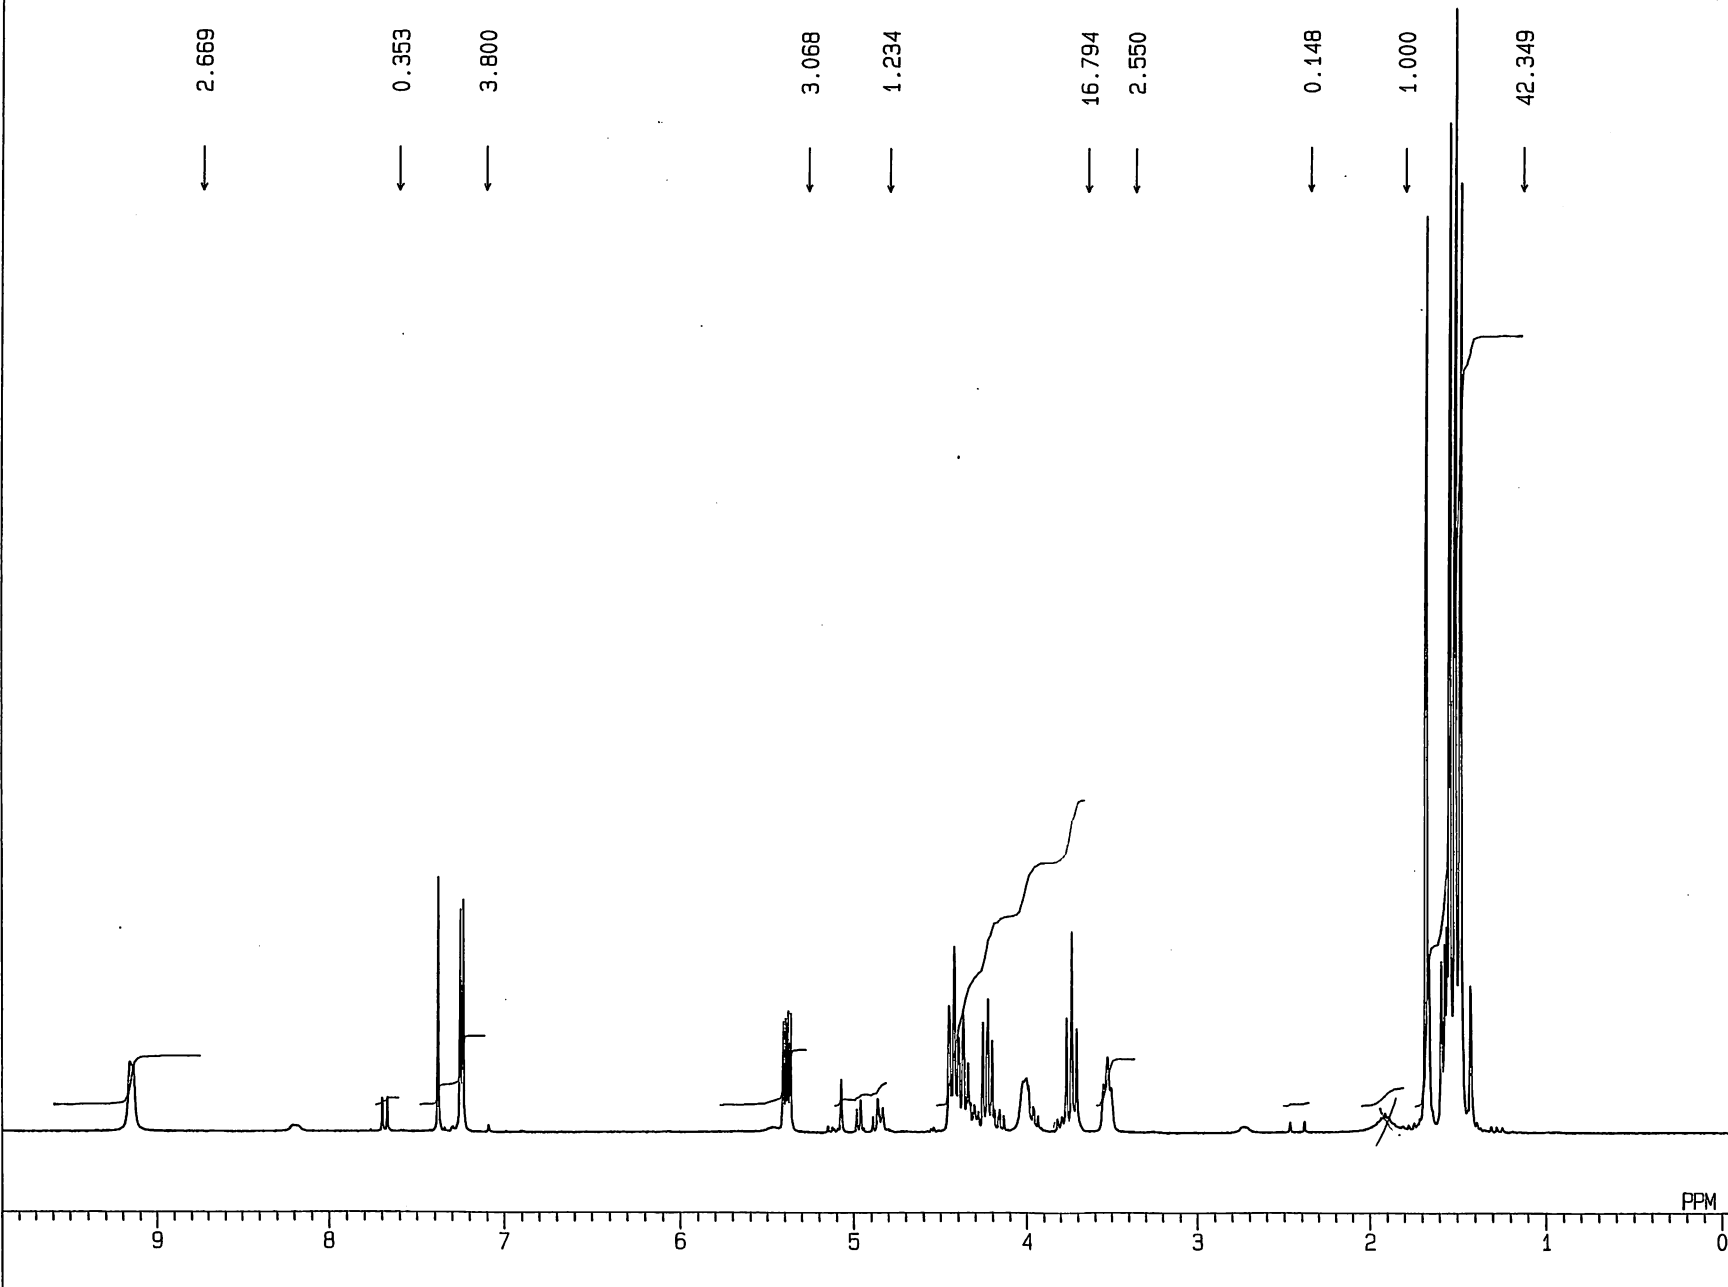

16-SEP-99 17: 58: 01  
DFILE Q1H  
OBNUC 1H  
EXMOD NON  
OFR 270.05 MHz  
OBSET 112.00 kHz  
OBFIN 5800.0 Hz  
POINT 32768  
FREQU 5405.4 Hz  
SCANS 16  
ACQTM 3.031 sec  
PD 3.969 sec  
PW1 5.5 us  
IRNUC 1H  
CTEMP 24.1 c  
SLVNT CDCL3  
EXREF 7.24 ppm  
BF 0.16 Hz  
RGAIN 16  
OPERATOR : \_\_\_\_\_

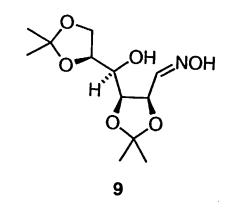

iso-glo-oxi

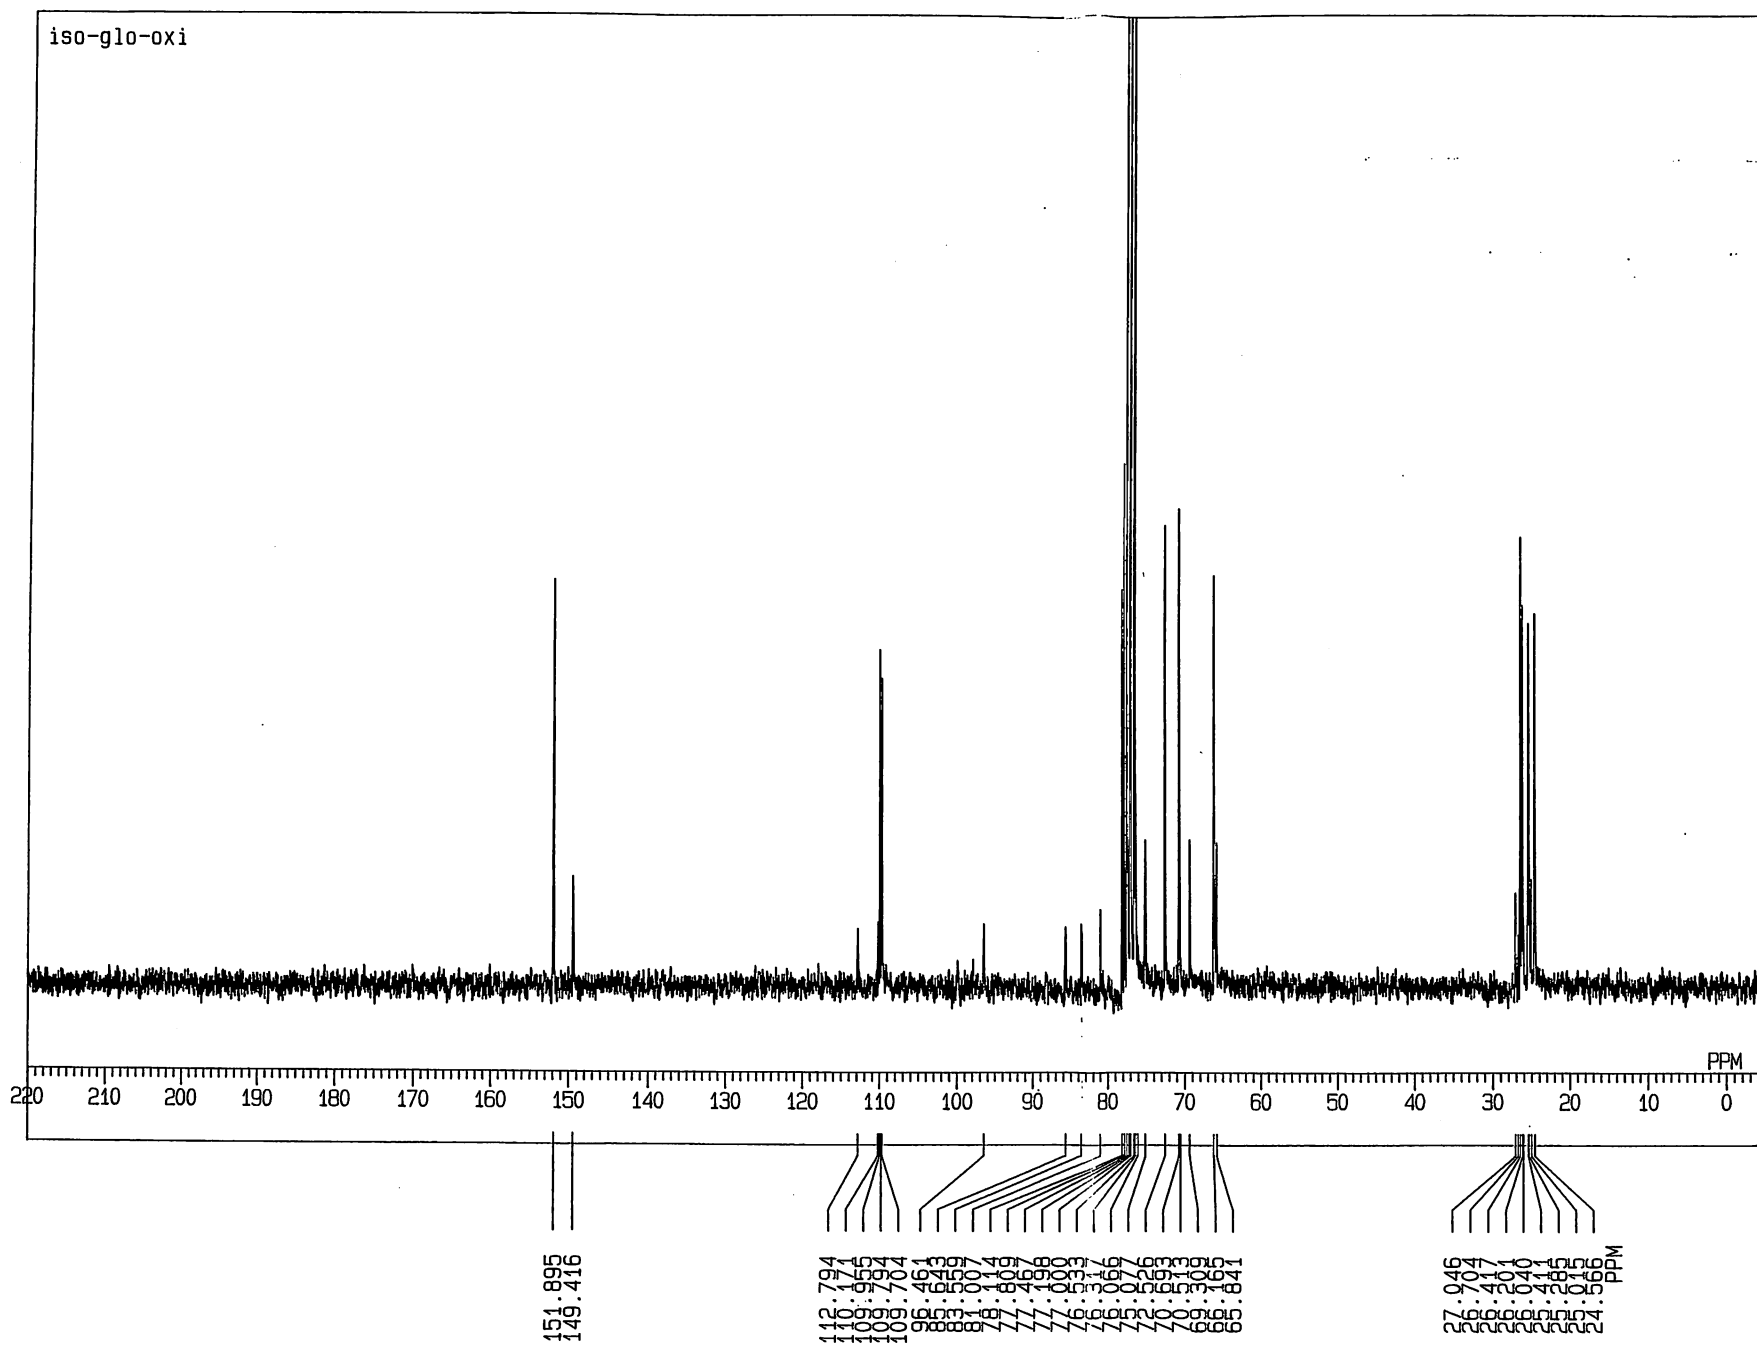

16-SEP-99 21: 51: 24  
DFILE Q13C  
OBNUC 13C  
EXMOD BCM  
OFR 67.80 MHz  
OBSET 135.00 kHz  
OBFIN 5200.0 Hz  
POINT 32768  
FREQU 20000.0 Hz  
SCANS 1606  
ACQTM 0.819 sec  
PD 2.181 sec  
PW1 4.3 us  
IRNUC 1H  
CTEMP 25.2 c  
SLVNT CDCL3  
EXREF 77.00 ppm  
BF 1.50 Hz  
RGAIN 29  
OPERATOR : \_\_\_\_\_

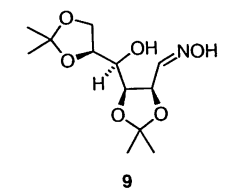

D:\842\2-non.als  
 NM.842-2

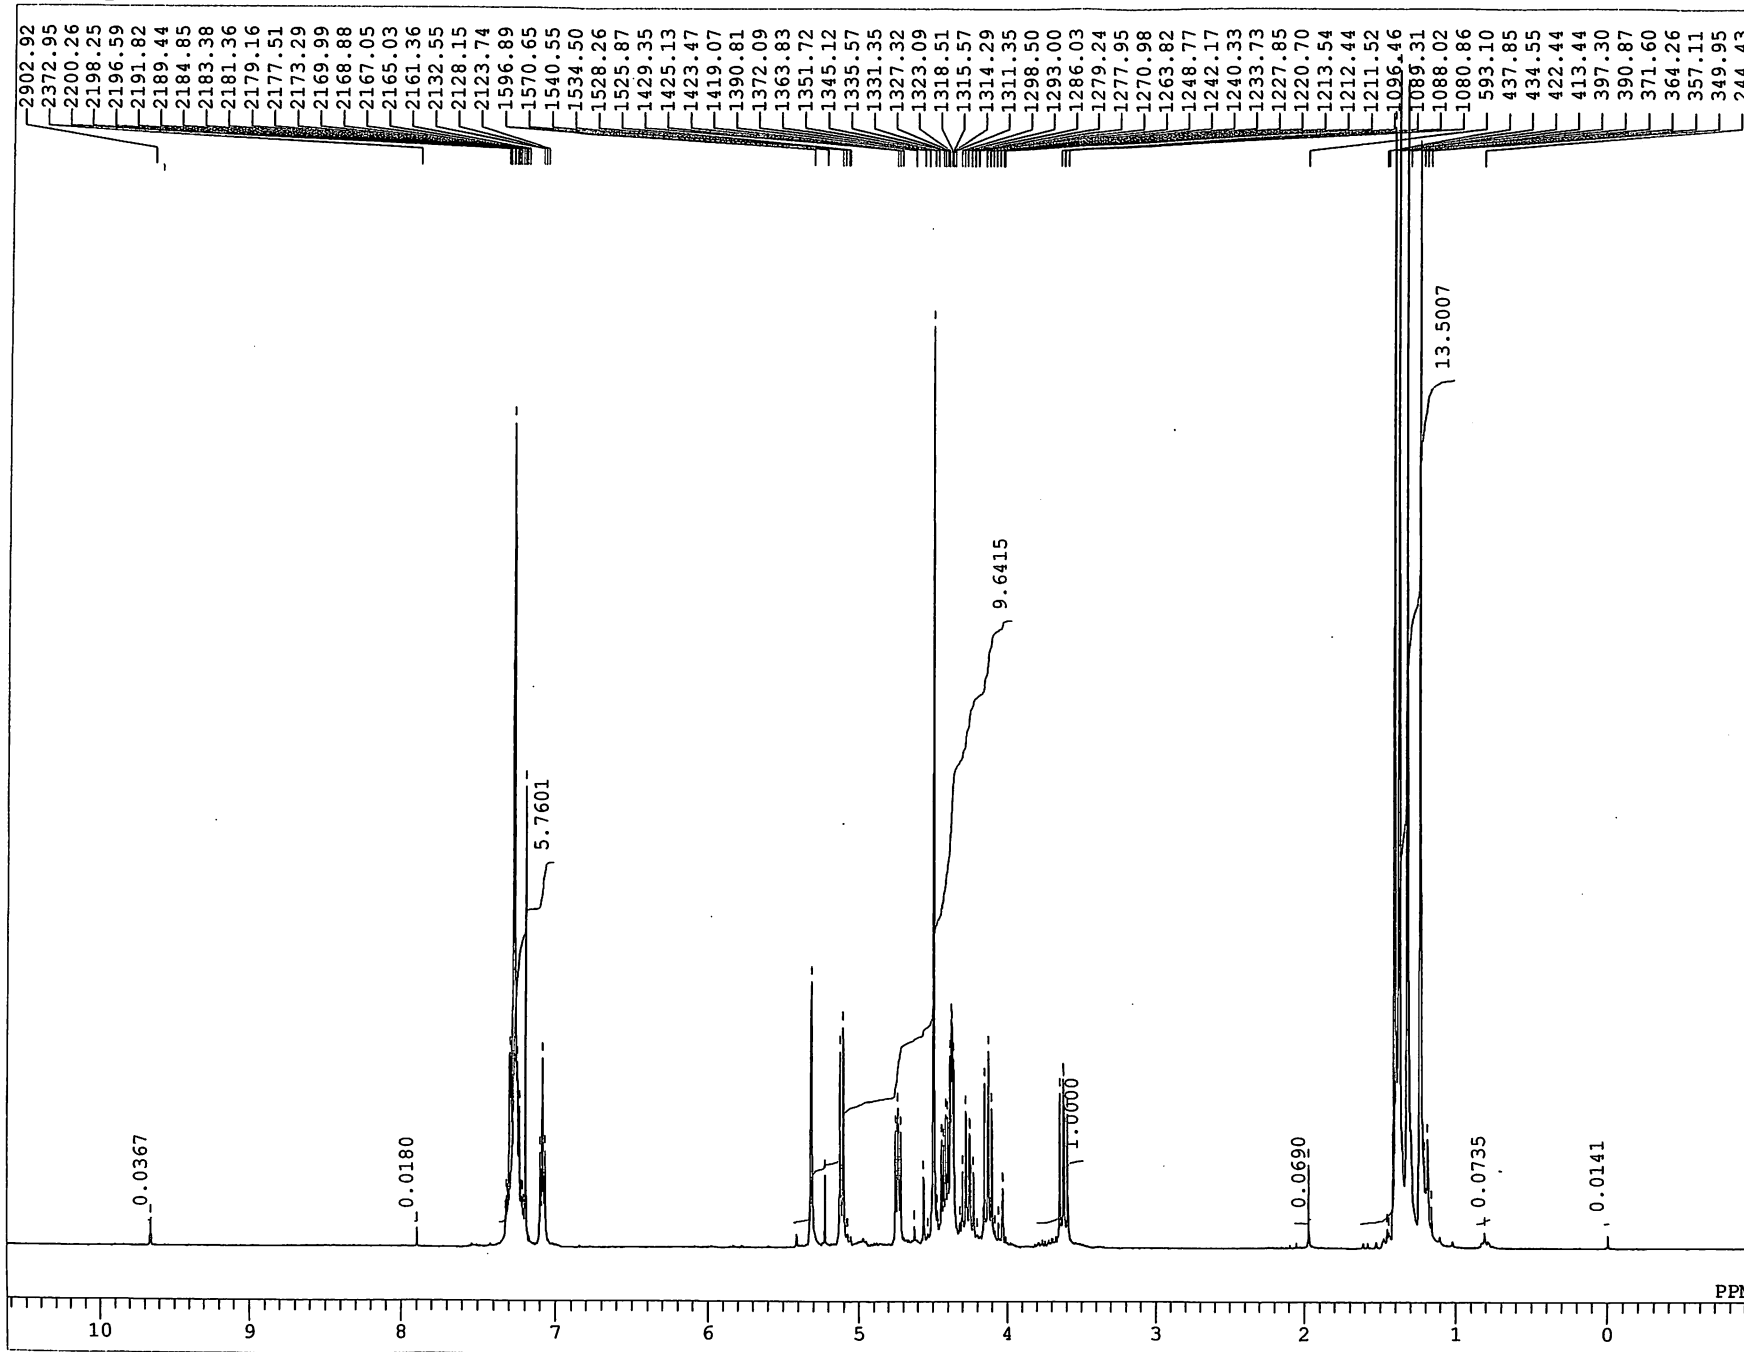

D:\842\2-non.als  
 NM.842-2  
 Thu Jan 21 13:36:42 1995  
 1H  
 NON  
 OBFRQ 300.40 MHz  
 OBSET 130.00 KHz  
 OBFIN 1150.0 Hz  
 POINT 32768  
 FREQU 6013.2 Hz  
 SCANS 16  
 ACQTM 5.449 sec  
 PD 1.551 sec  
 PW1 5.8 us  
 IRNUC 1H  
 CTEMP 24.3 c  
 SLVNT CDCL3  
 EXREF 0.00 ppm  
 BF 0.09 Hz  
 RGAIN 15

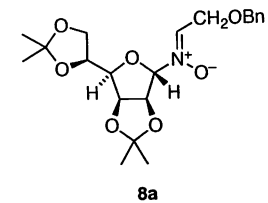



NM.845-3Fr5-7

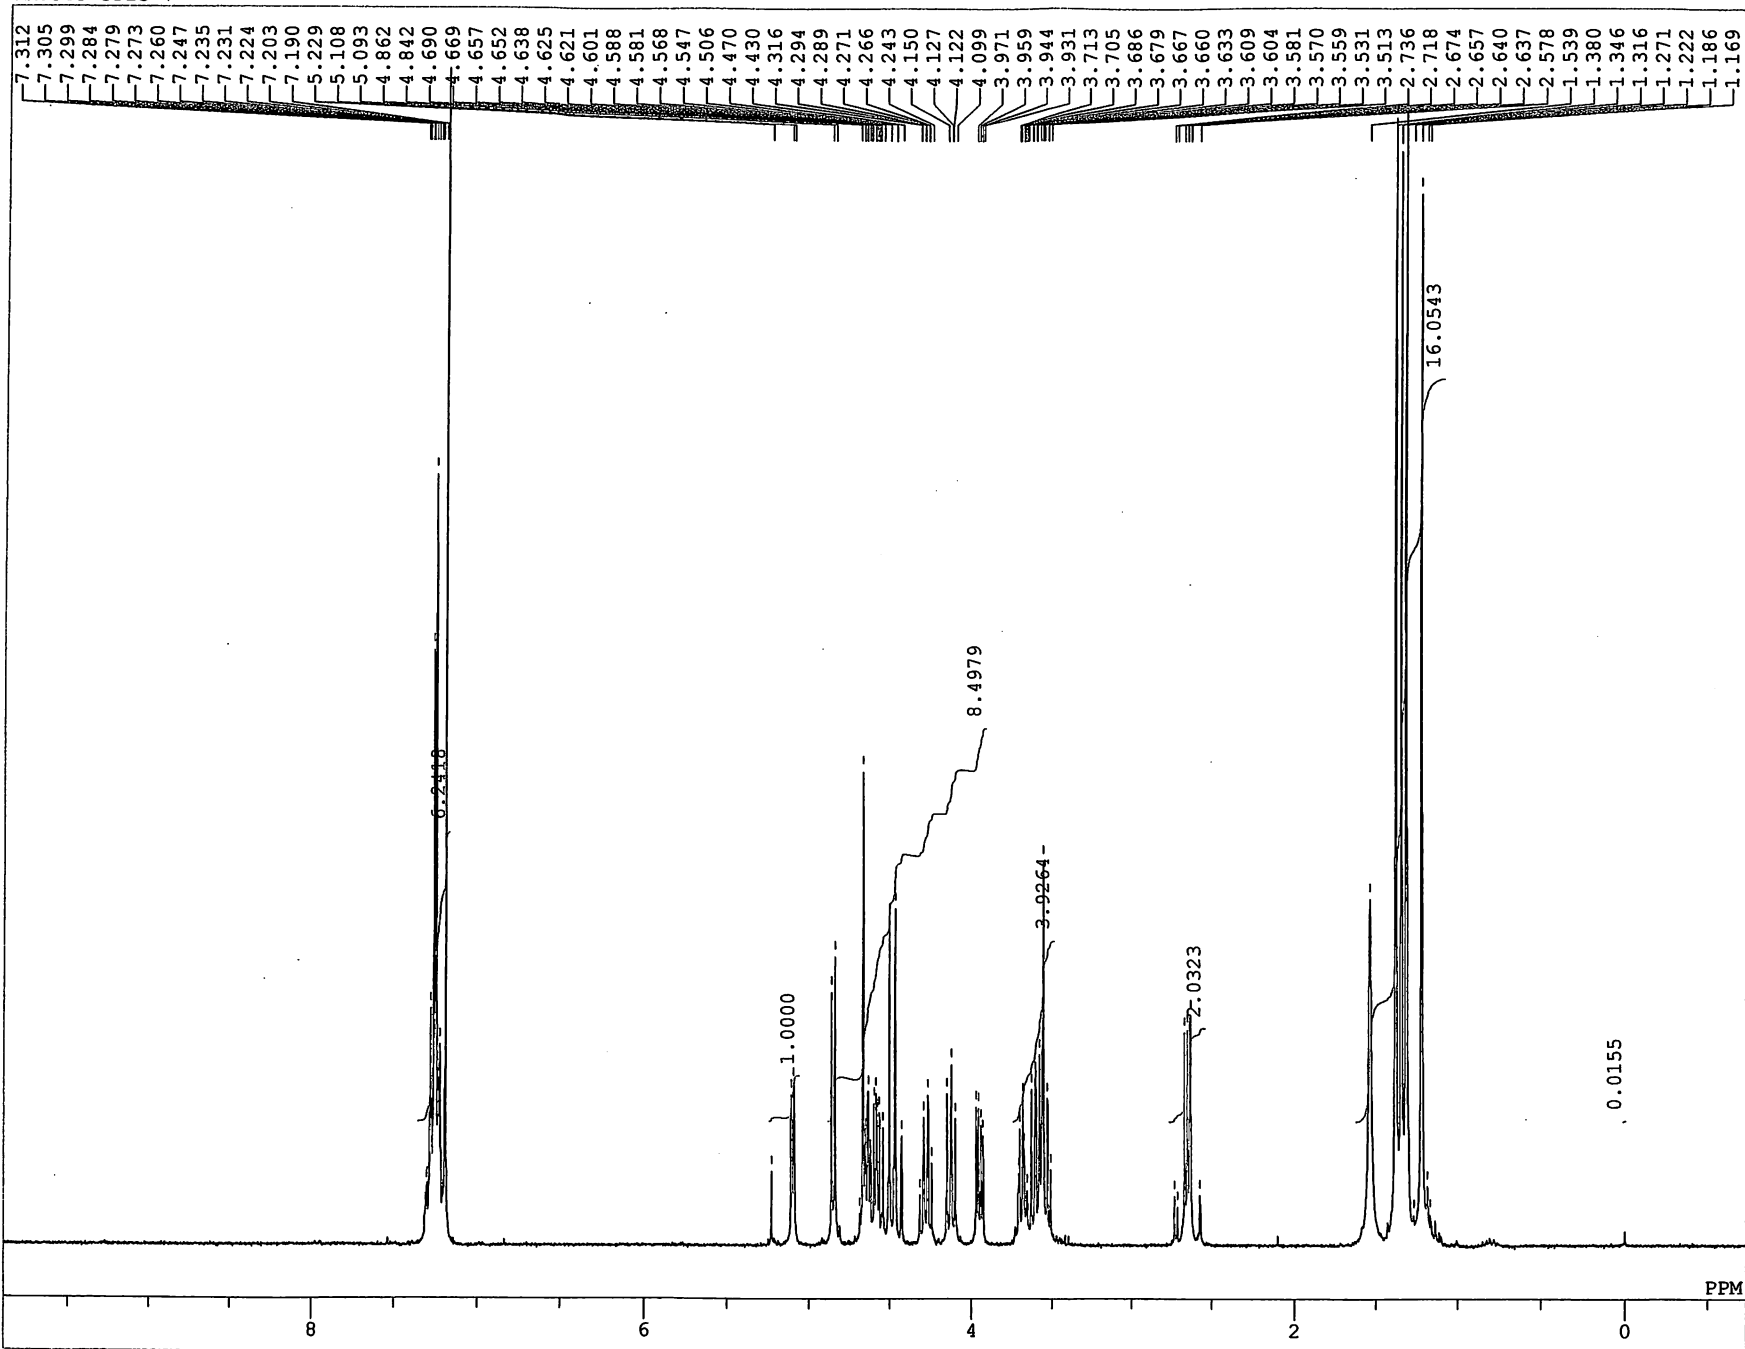

DFILE C:\WINNMR95\COMMON\\_DEF  
COMNT NM.845-3Fr5-7  
DATIM Wed Mar 03 21:22:35 1995  
OBNUC 1H  
EXMOD NON  
OBFRQ 300.40 MHz  
OBSET 130.00 KHz  
OBFIN 1150.0 Hz  
POINT 32768  
FREQU 6013.2 Hz  
SCANS 16  
ACQTM 5.449 sec  
PD 1.551 sec  
PW1 5.8 us  
IRNUC 1H  
CTEMP 23.8 c  
SLVNT CDCL3  
EXREF 0.00 ppm  
BF 0.09 Hz  
RGAIN 20

PhCH2O

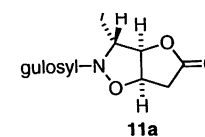

NM.860Fr10-16,3

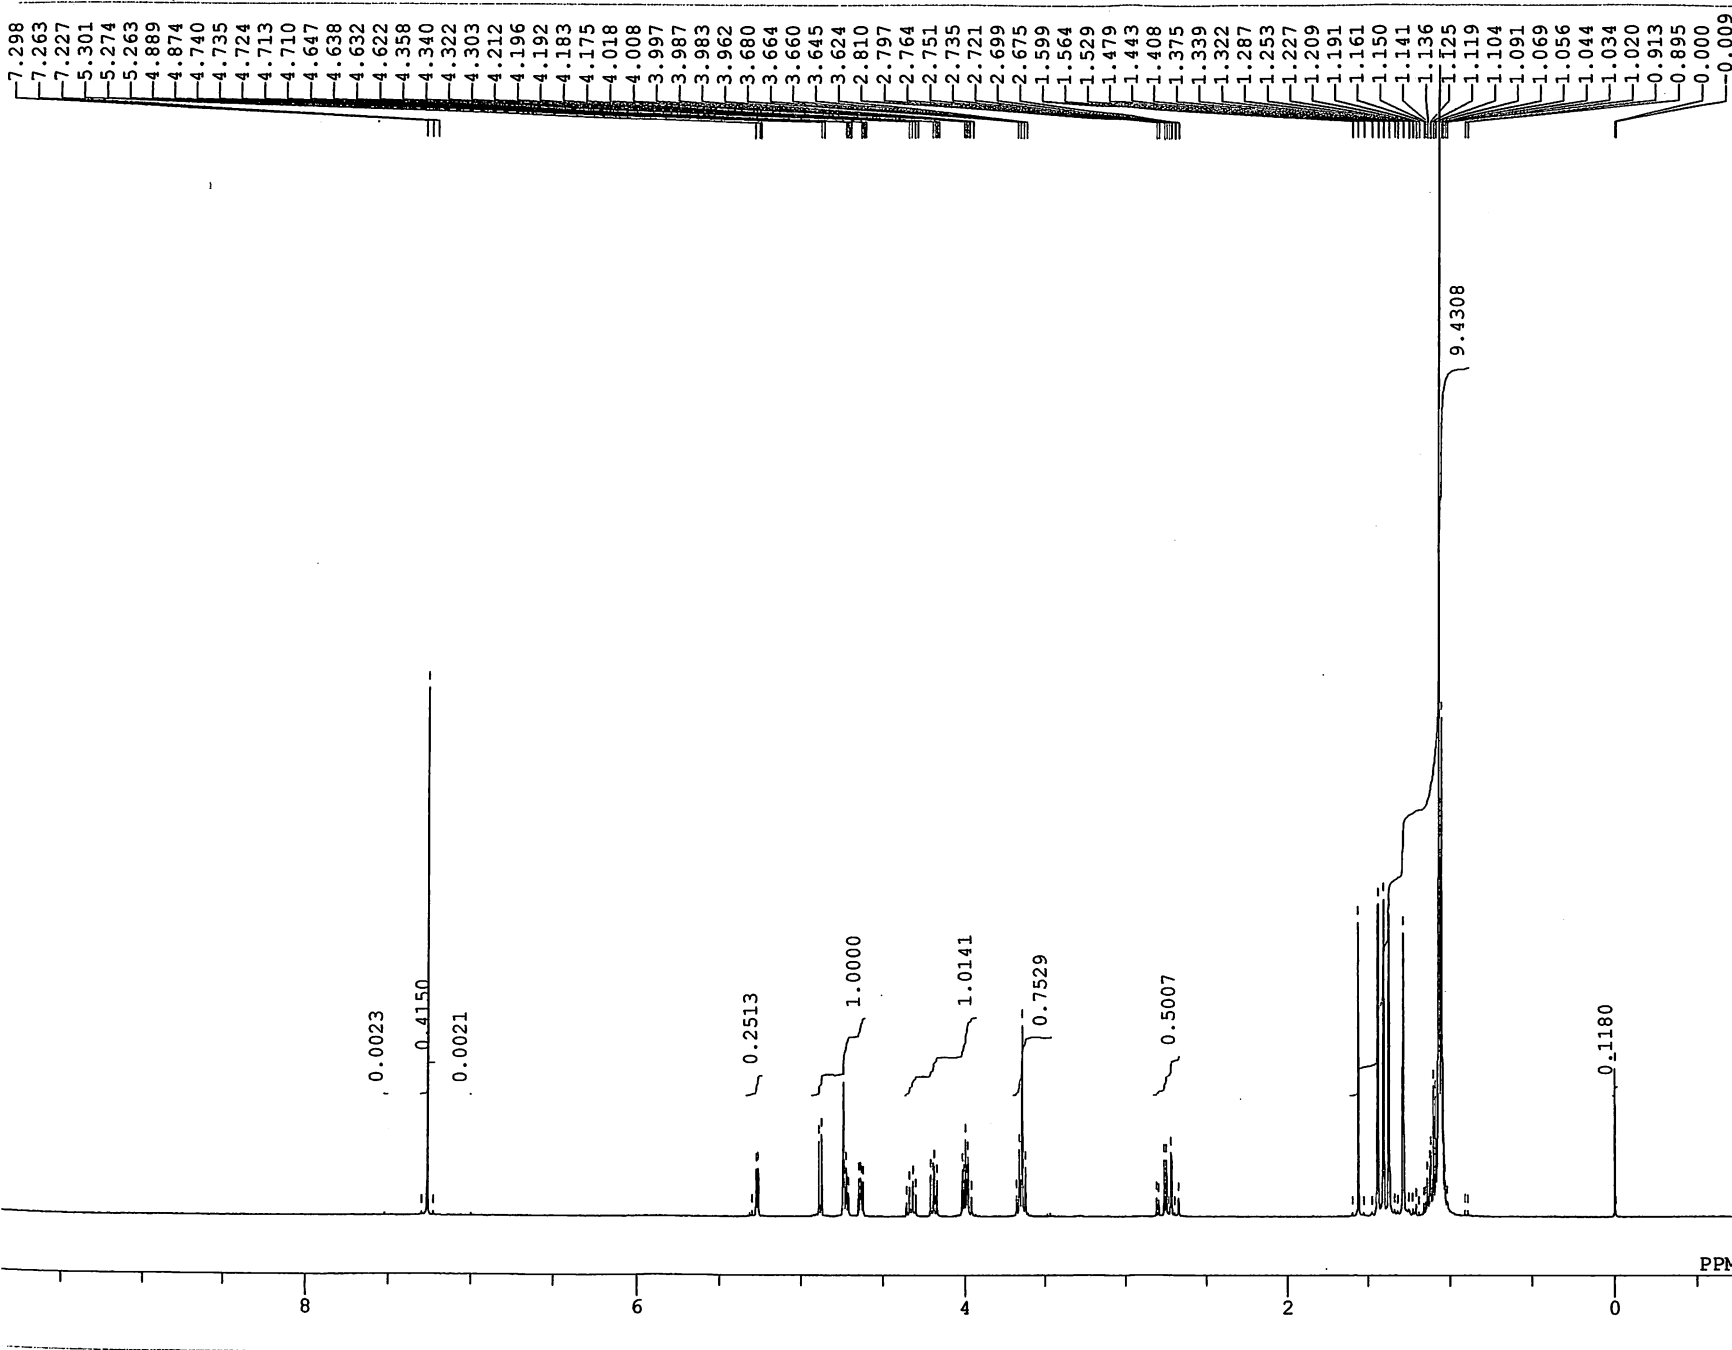

DFILE C:\WINNMR95\COMMON\\_DEFAULT.  
COMNT NM.860Fr10-16,3  
DATIM Thu Jan 27 18:52:47 2000  
OBNUC 1H  
EXMOD NON  
OBFRQ 399.65 MHz  
OBSET 124.00 KHz  
OBFIN 10500.0 Hz  
POINT 32768  
FREQU 8000.0 Hz  
SCANS 16  
ACQTM 4.096 sec  
PD 3.967 sec  
PW1 5.0 us  
IRNUC 1H  
CTEMP 25.0 c  
SLVNT CDCL3  
EXREF 0.00 ppm  
BF 0.12 Hz  
RGAIN 19

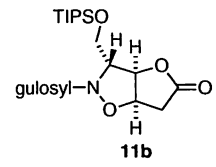

NM.860Fr10-16,3

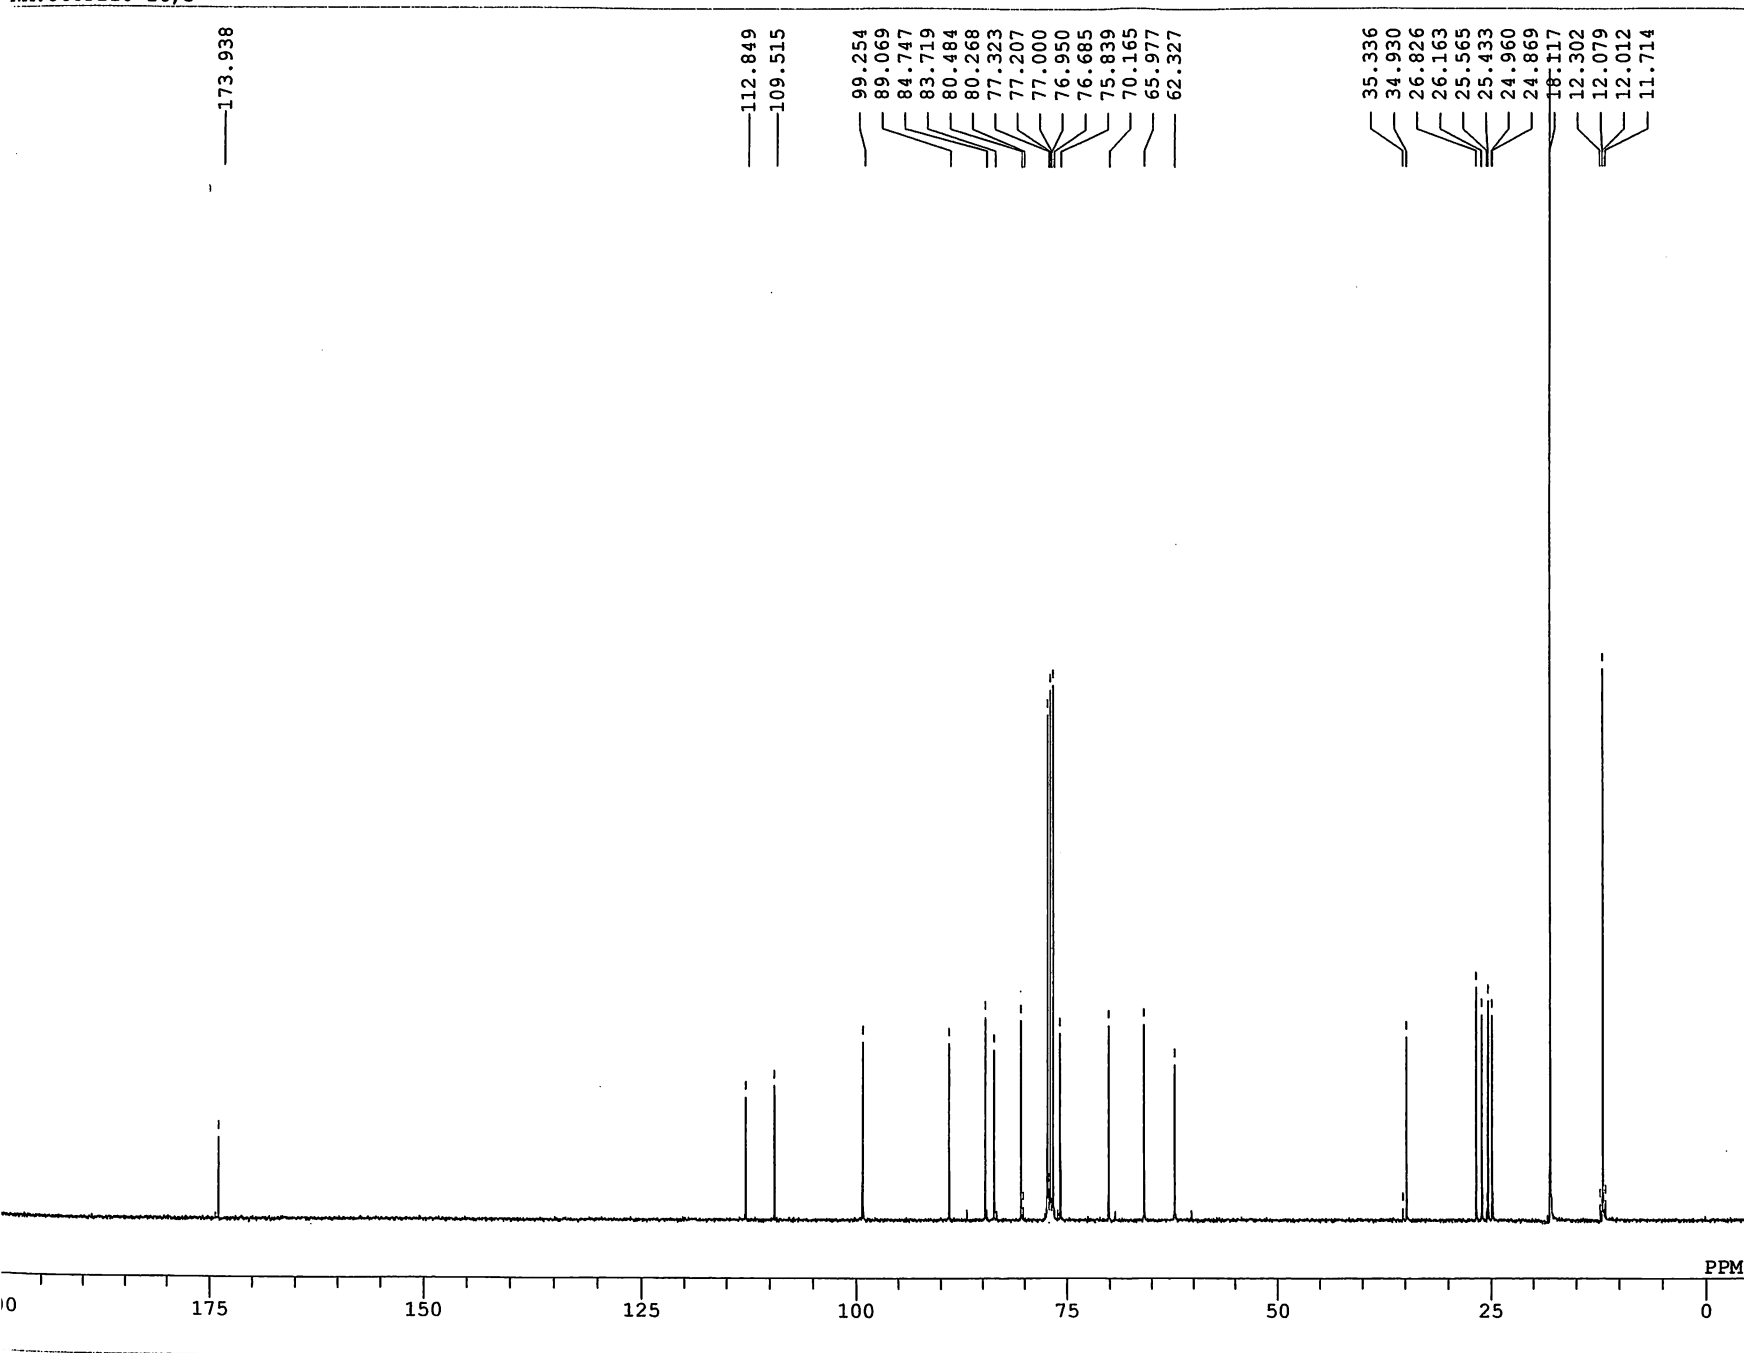

DFILE C:\WINNMR95\TEMPDATA\AUTO2BC  
COMNT NM.860Fr10-16,3  
DATIM Fri Jan 28 00:04:37 2000  
OBNUC 13C  
EXMOD BCM  
OBFRQ 100.40 MHz  
OBSET 125.00 KHz  
OBFIN 10500.0 Hz  
POINT 32768  
FREQU 27322.4 Hz  
SCANS 4096  
ACQTM 1.199 sec  
PD 1.797 sec  
PW1 4.8 us  
IRNUC 1H  
CTEMP 30.0 c  
SLVNT CDCL3  
EXREF 77.00 ppm  
BF 1.20 Hz  
RGAIN 26

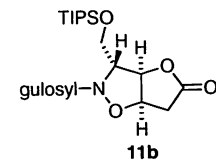

NM.877Fr.19-24

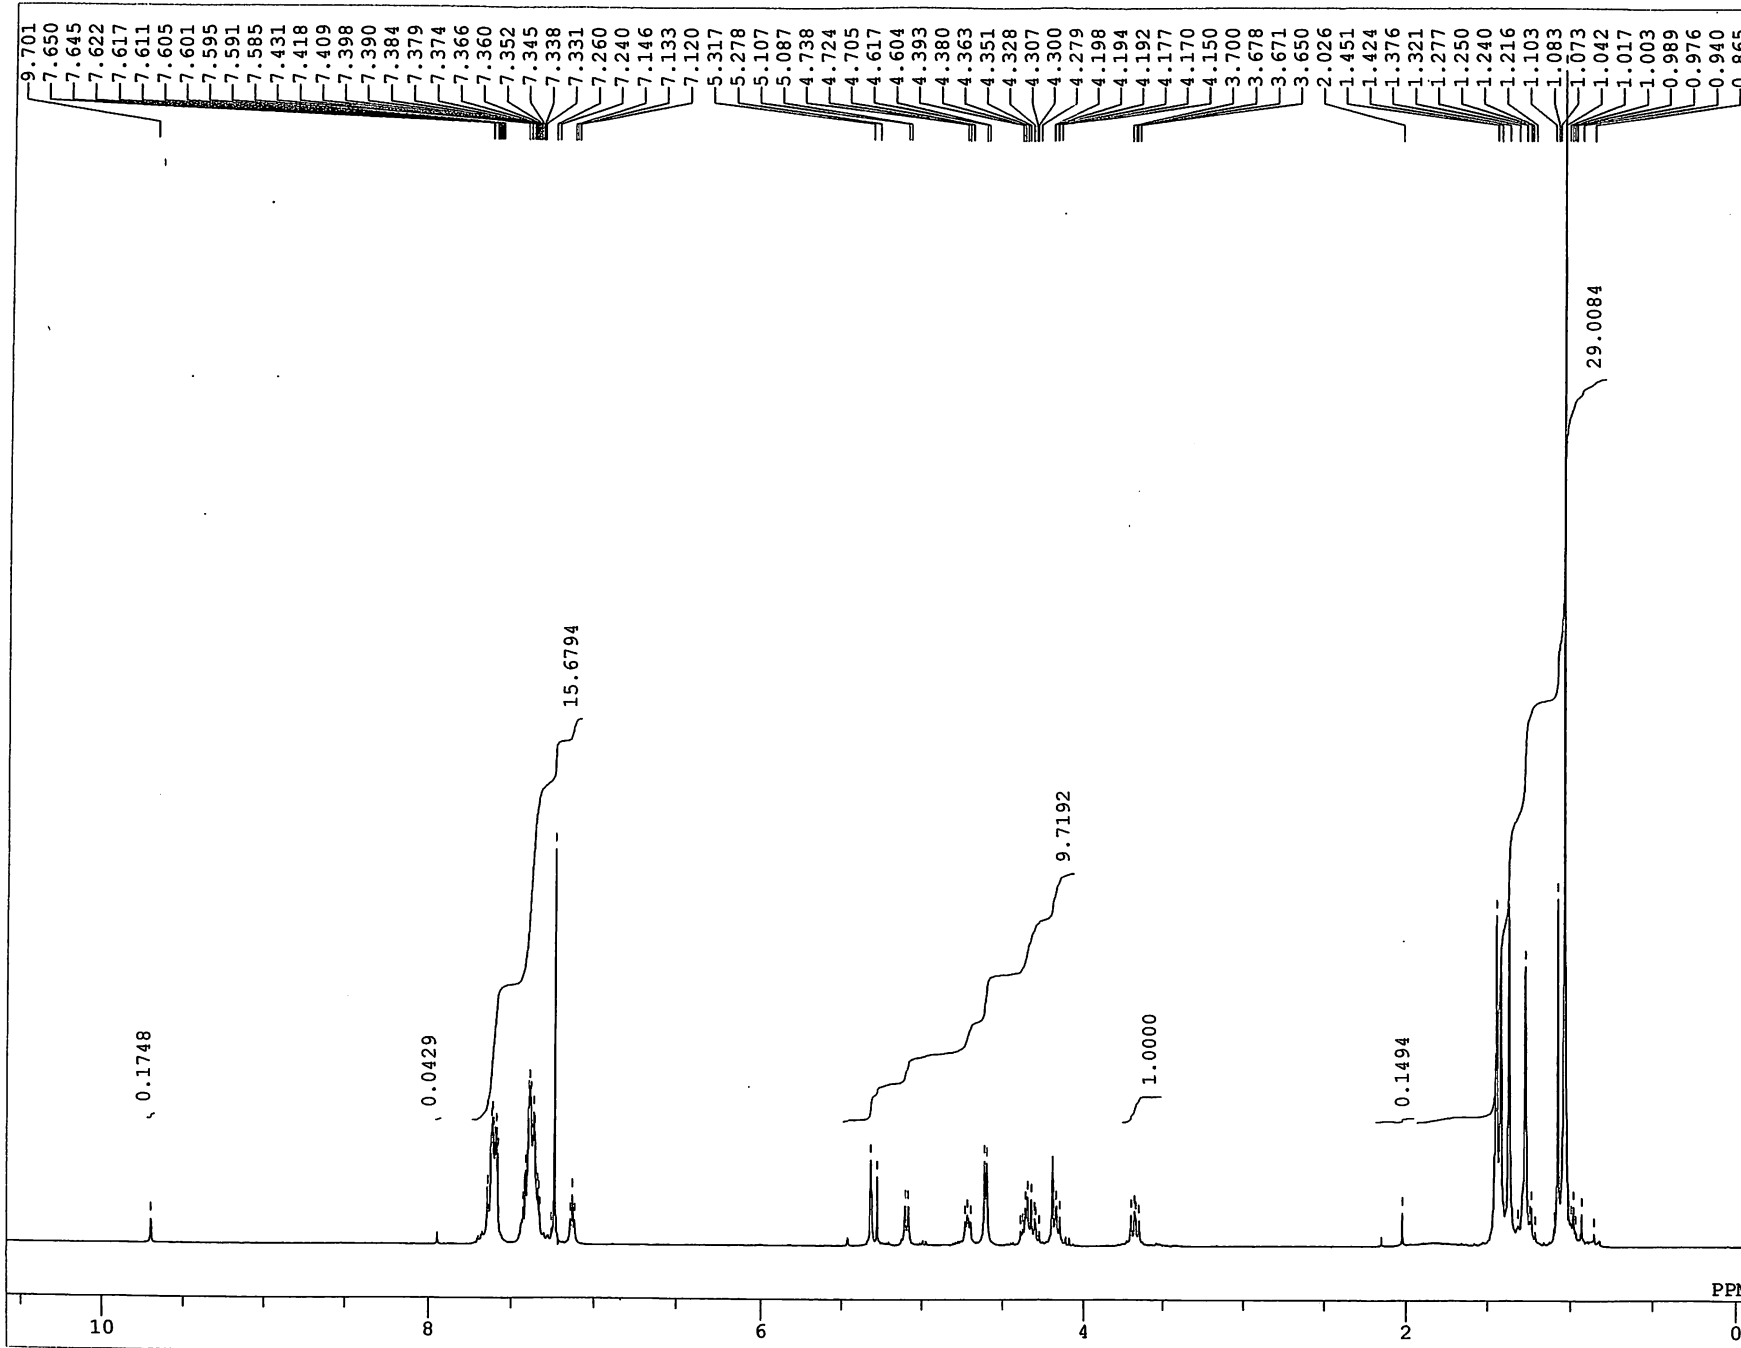

DFILE C:\WINNMR95\COMMON\\_DEF  
 COMNT NM.877Fr.19-24  
 DATIM Wed Mar 03 14:53:39 1995  
 OBNUC 1H  
 EXMOD NON  
 OBFREQ 300.40 MHz  
 OBSET 130.00 KHz  
 OBFIN 1150.0 Hz  
 POINT 32768  
 FREQU 6013.2 Hz  
 SCANS 16  
 ACQTM 5.449 sec  
 PD 1.551 sec  
 PW1 5.8 us  
 IRNUC 1H  
 CTEMP 24.5 c  
 SLVNT CDCL3  
 EXREF 7.24 ppm  
 BF 0.12 Hz  
 RGAIN 18

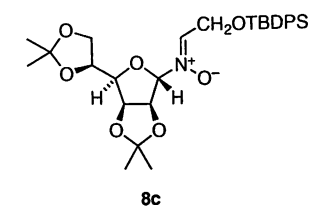

SK.27Fr14-19

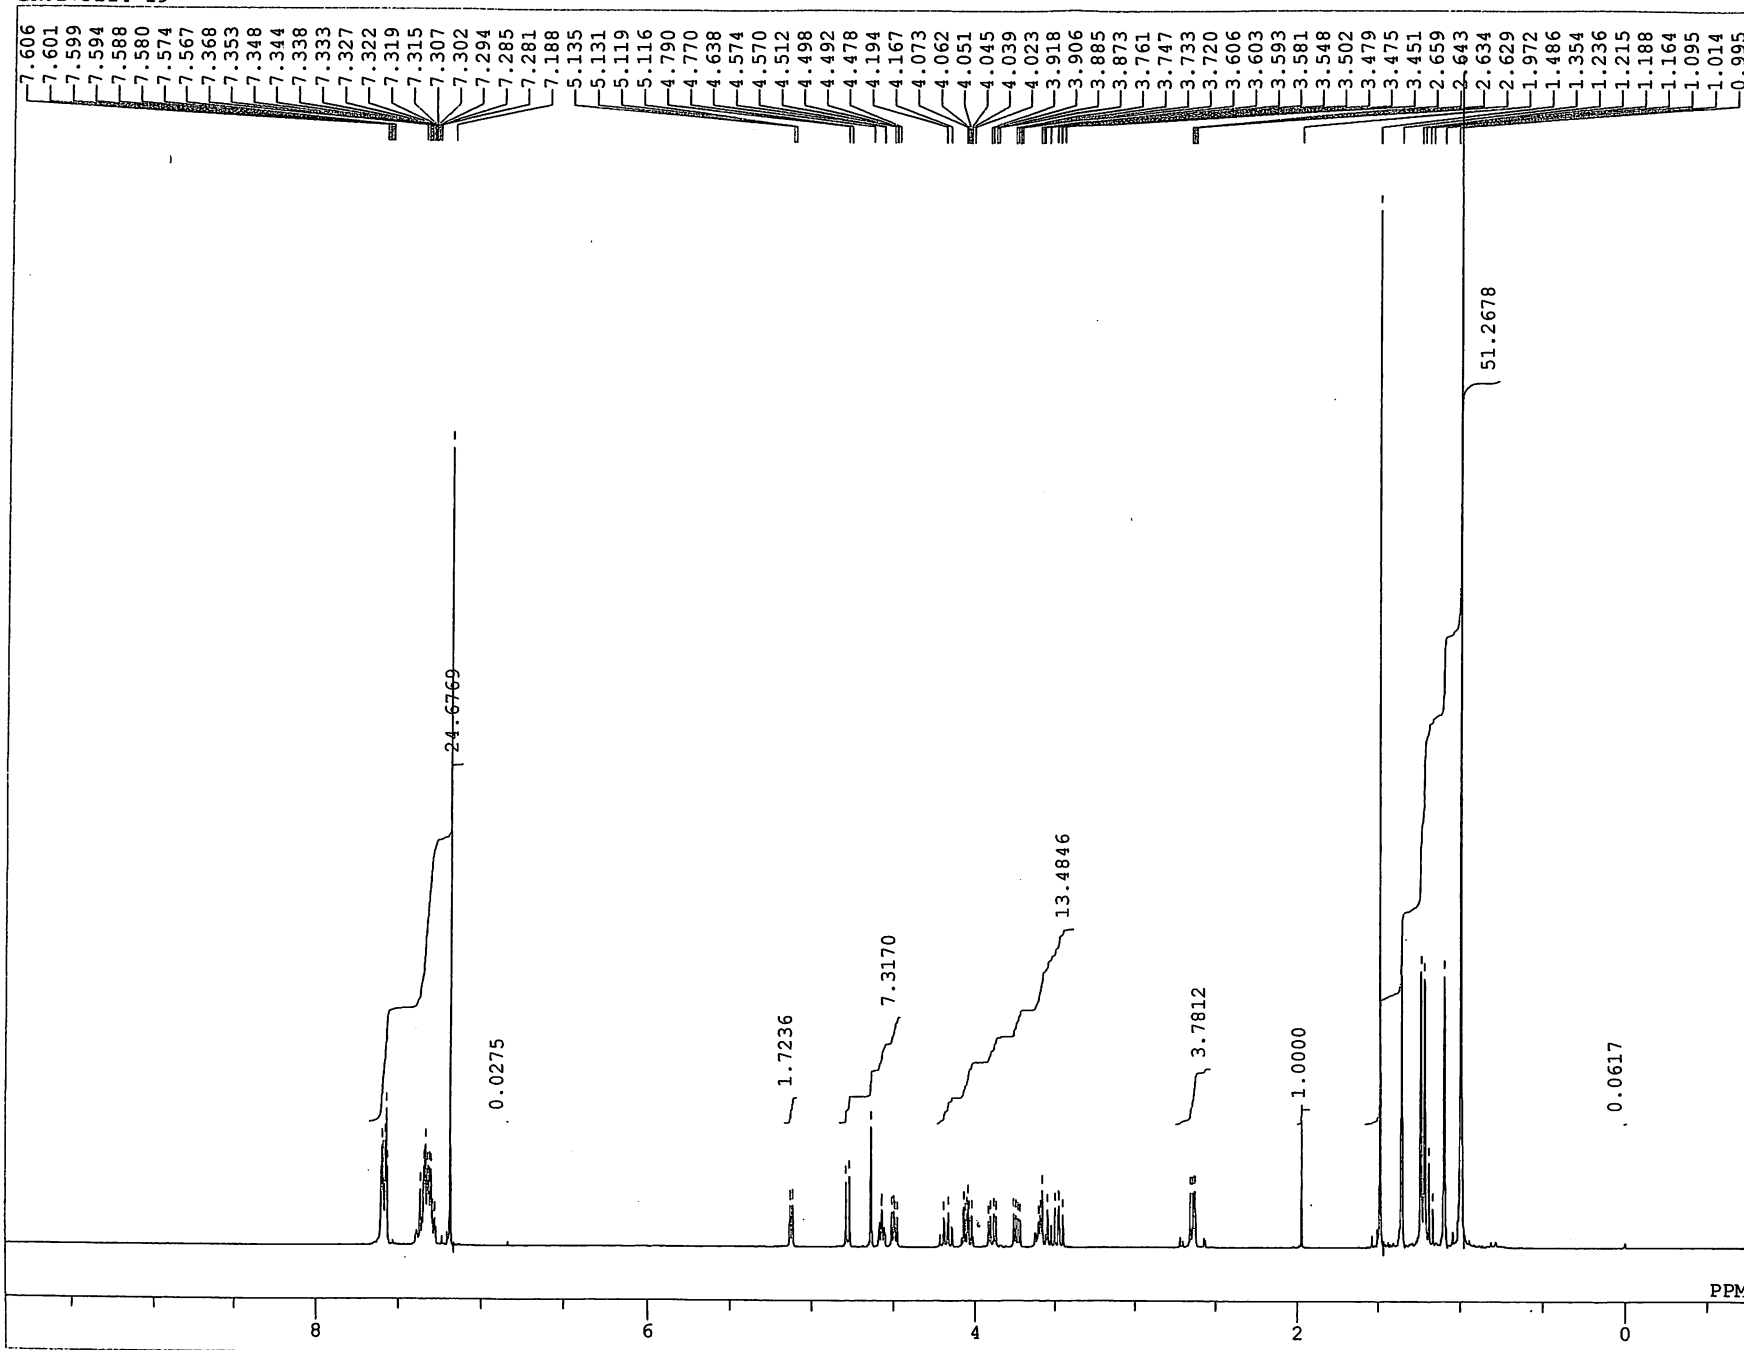

DFILE C:\WINNMR95\COMMON\\_DEF  
 COMNT SK.27Fr14-19  
 DATIM Tue Aug 24 19:09:05 1999  
 OBNUC 1H  
 EXMOD NON  
 OBFREQ 300.40 MHz  
 OBSET 130.00 KHz  
 OBFIN 1150.0 Hz  
 POINT 32768  
 FREQU 6013.2 Hz  
 SCANS 16  
 ACQTM 5.449 sec  
 PD 1.551 sec  
 PW1 5.8 us  
 IRNUC 1H  
 CTEMP 28.7 c  
 SLVNT CDCL3  
 EXREF 0.00 ppm  
 BF 0.12 Hz  
 RGAIN 18

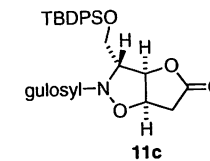

SK.27

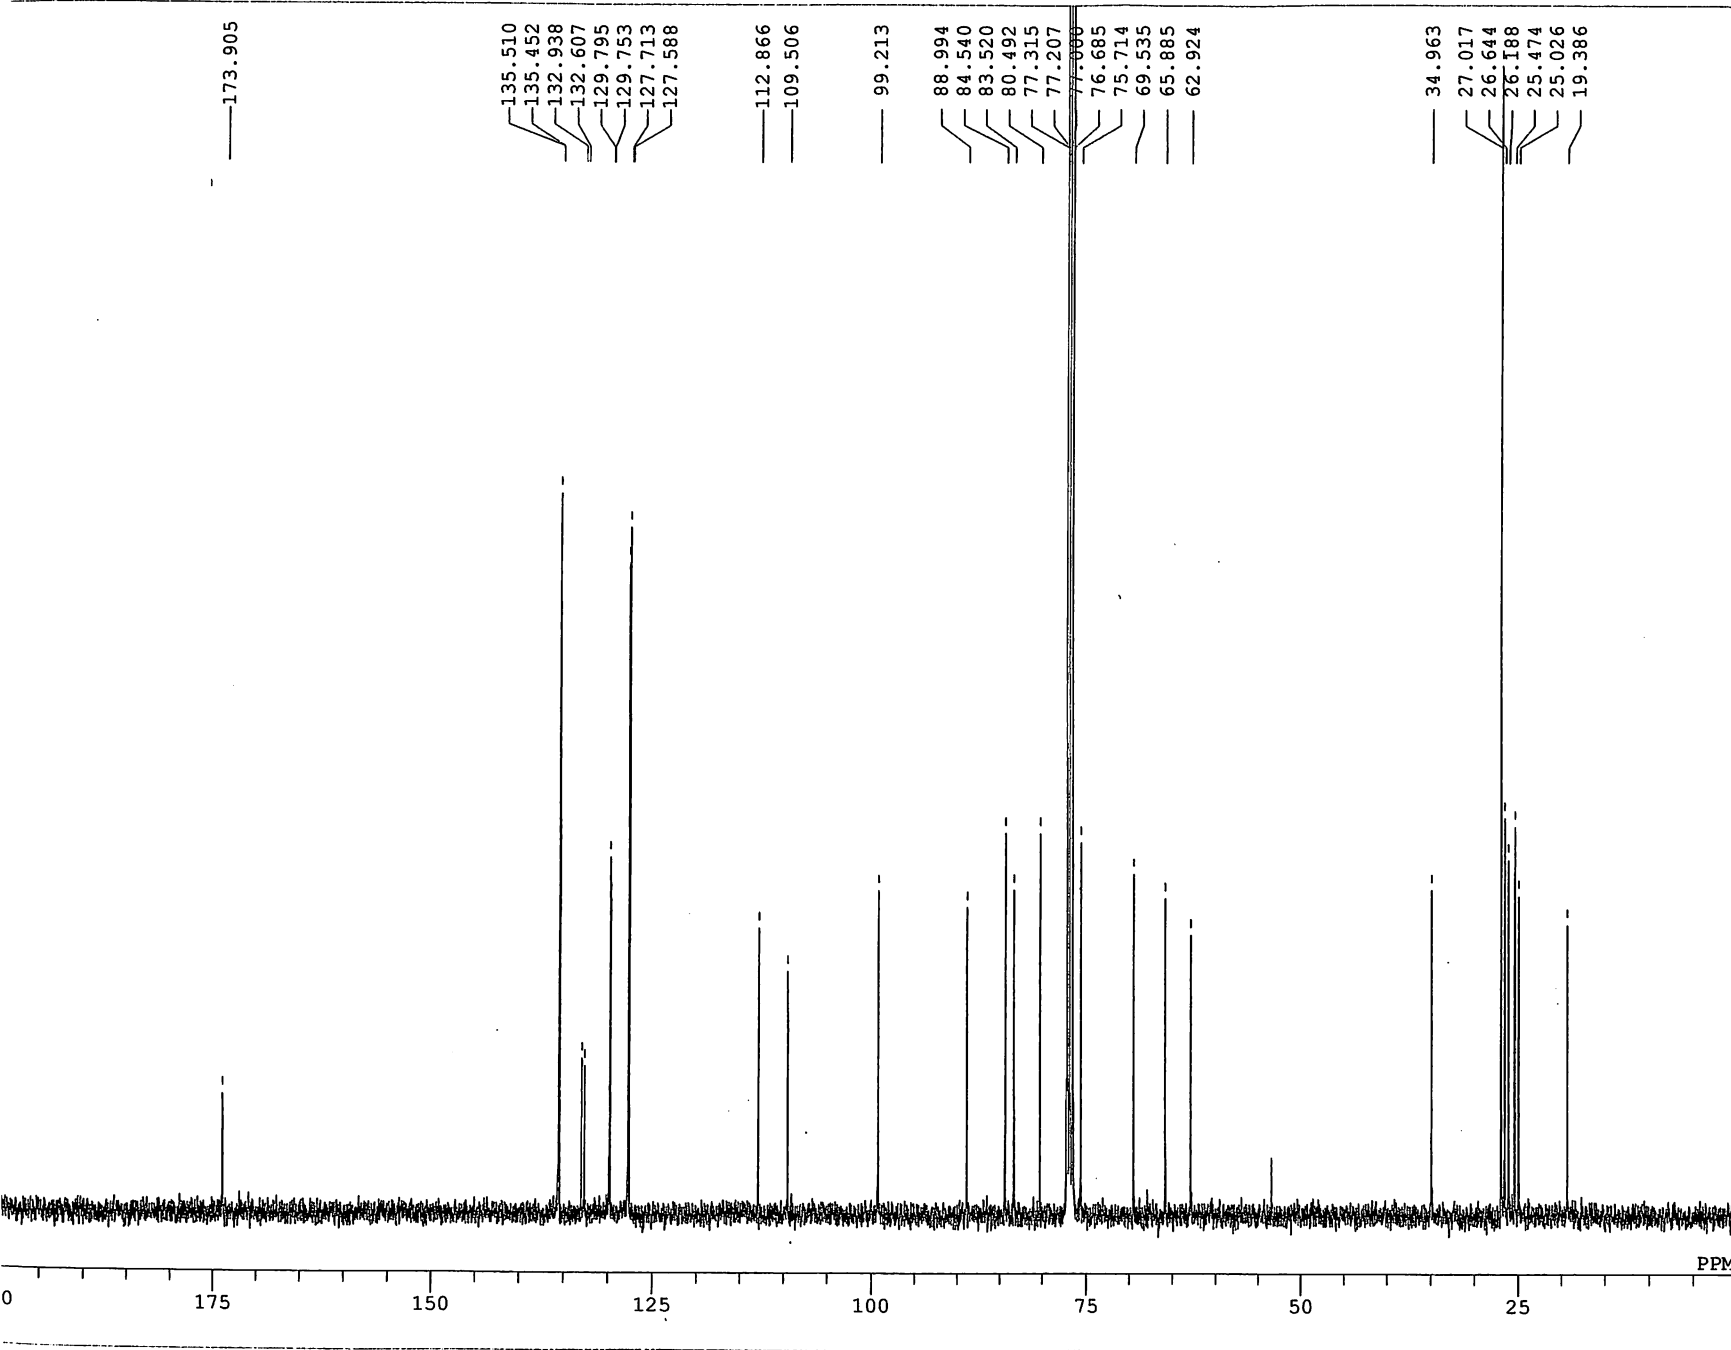

|        |                              |
|--------|------------------------------|
| DFILE  | C:\WINNMR95\TEMPDATA\AUTO2BC |
| COMNT  | SK.27                        |
| DATIM  | Tue Sep 07 22:36:16 1999     |
| OBNUC  | 13C                          |
| EXMOD  | BCM                          |
| OBFREQ | 100.40 MHz                   |
| OBSET  | 125.00 KHz                   |
| OBFIN  | 10500.0 Hz                   |
| POINT  | 32768                        |
| FREQU  | 27322.4 Hz                   |
| SCANS  | 2048                         |
| ACQTM  | 1.199 sec                    |
| PD     | 1.797 sec                    |
| PW1    | 4.8 us                       |
| IRNUC  | 1H                           |
| CTEMP  | 29.8 c                       |
| SLVNT  | CDCL3                        |
| EXREF  | 77.00 ppm                    |
| BF     | 1.20 Hz                      |
| RGAIN  | 26                           |

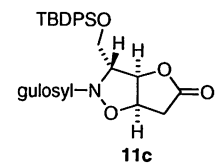

NM.858

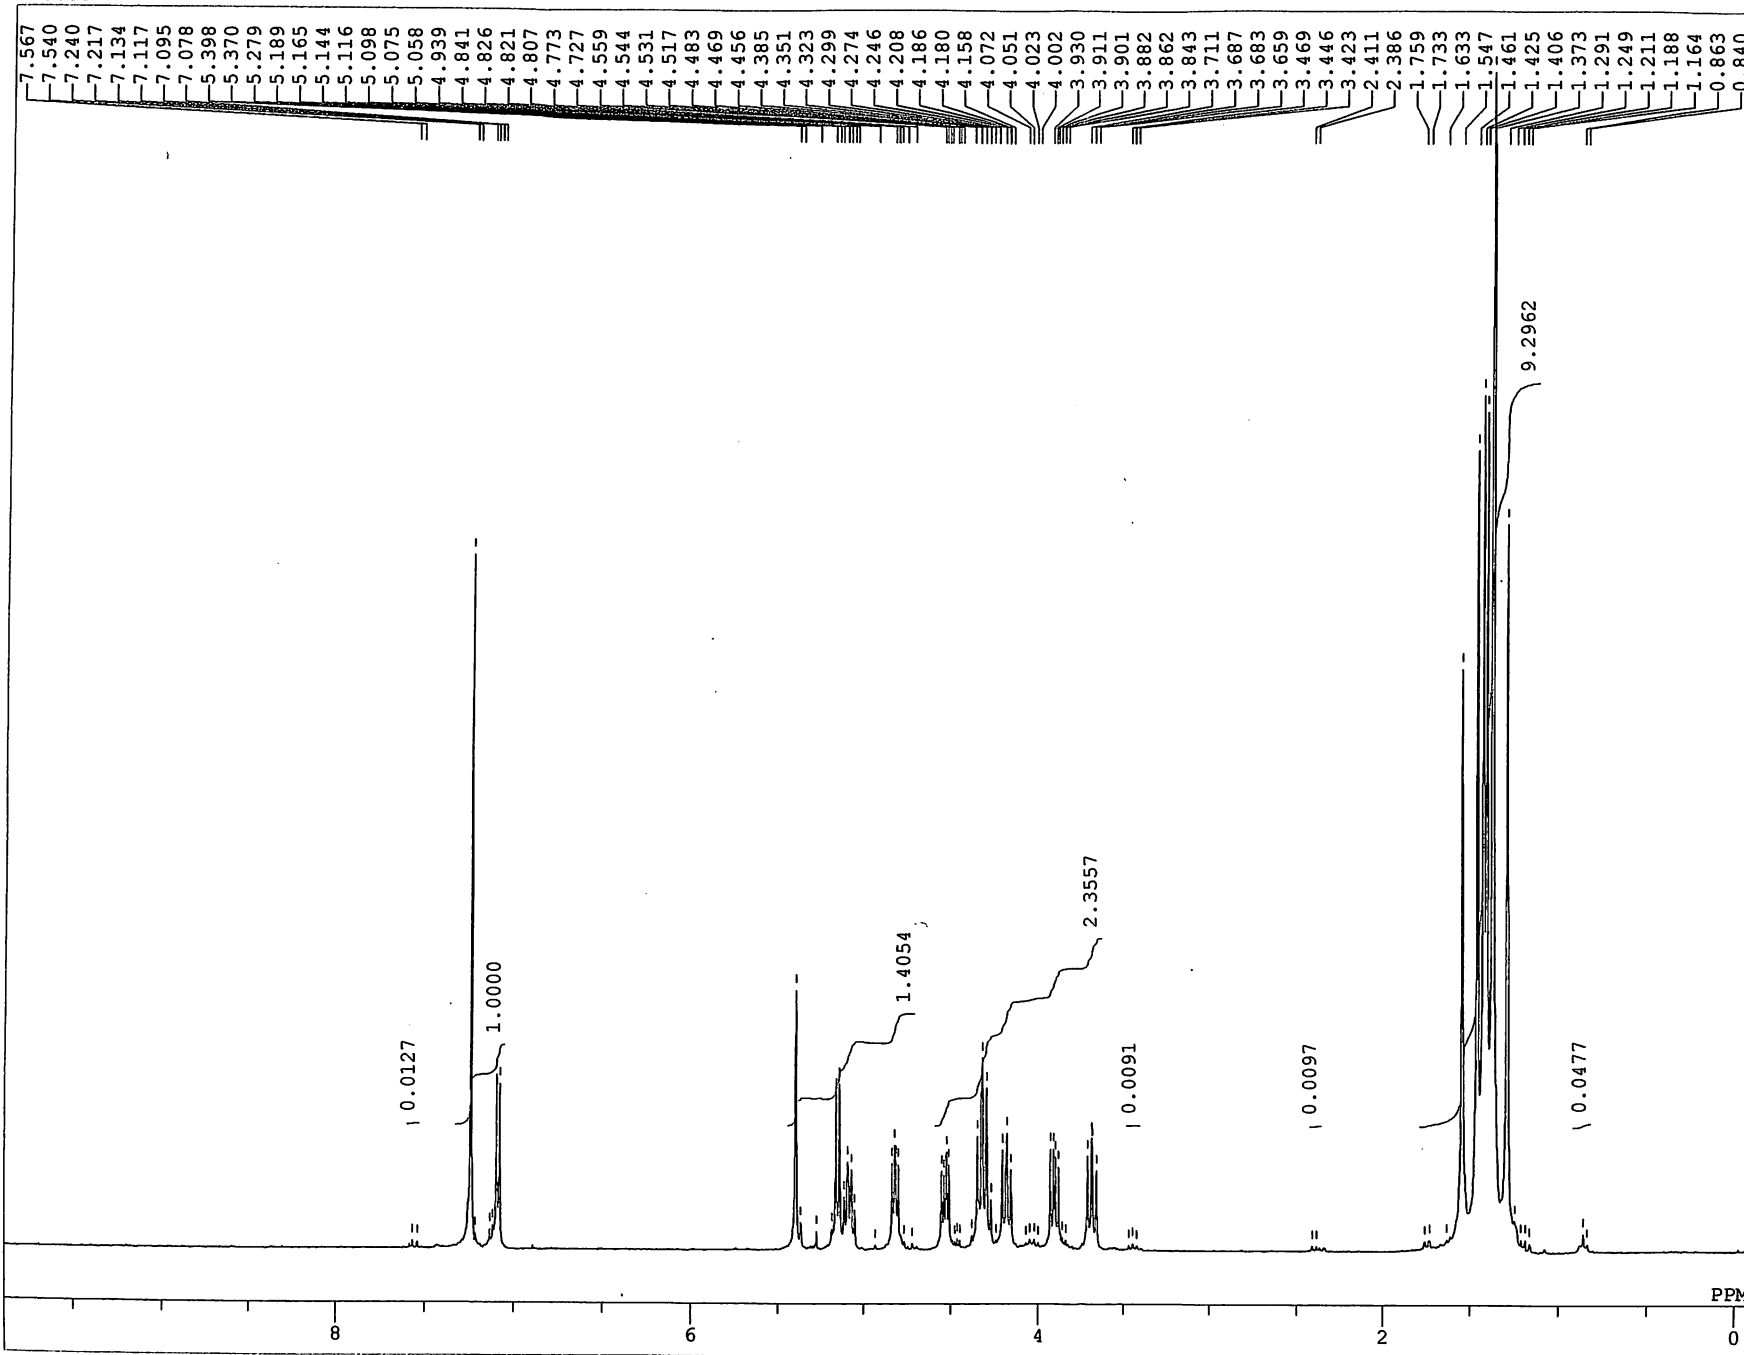

DFILE C:\WINNMR95\COMMON\\_DEF  
COMNT NM.858  
DATIM Sat Jan 30 15:04:30 1995  
OBNUC 1H  
EXMOD NON  
OBFRQ 300.40 MHz  
OBSET 130.00 KHz  
OBFIN 1150.0 Hz  
POINT 32768  
FREQU 6013.2 Hz  
SCANS 16  
ACQTM 5.449 sec  
PD 1.551 sec  
PW1 5.8 us  
IRNUC 1H  
CTEMP 23.8 c  
SLVNT CDCL3  
EXREF 7.24 ppm  
BF 0.62 Hz  
RGAIN 20

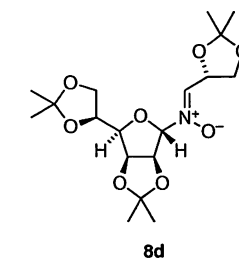

NM.832Fr9-14recry

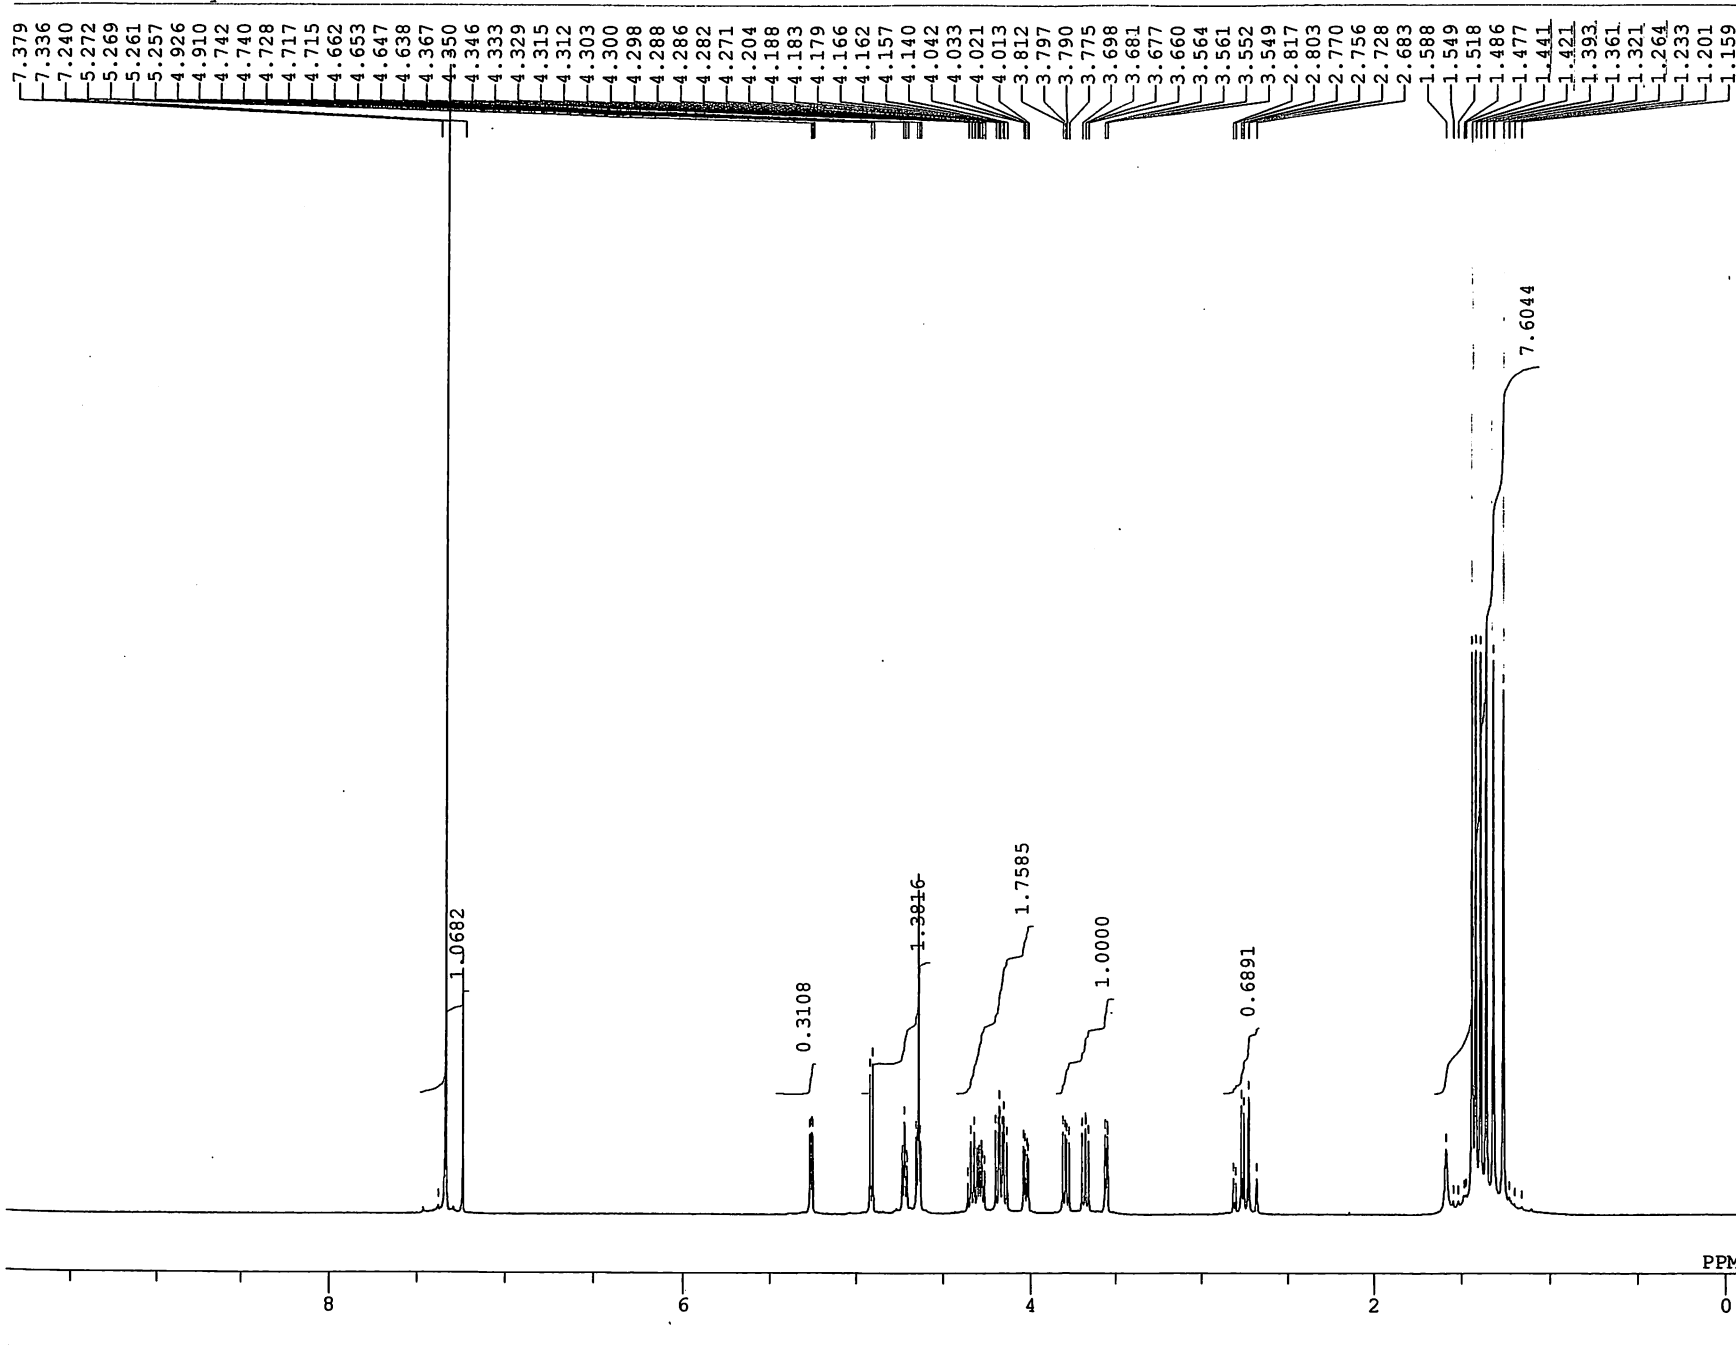

DFILE C:\WINNMR95\COMMON\\_DEFAULT.  
COMNT NM.832Fr9-14recry  
DATIM Tue Dec 22 15:43:18 1998  
OBNUC 1H  
EXMOD NON  
OBFREQ 399.65 MHz  
OBSET 124.00 KHz  
OBFIN 10500.0 Hz  
POINT 32768  
FREQU 8000.0 Hz  
SCANS 16  
ACQTM 4.096 sec  
PD 3.967 sec  
PW1 5.0 us  
IRNUC 1H  
CTEMP 25.0 c  
SLVNT CDCL3  
EXREF 7.24 ppm  
BF 0.12 Hz  
RGAIN 18

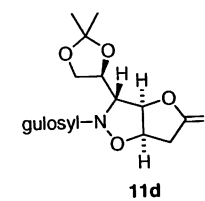



NM.832cry

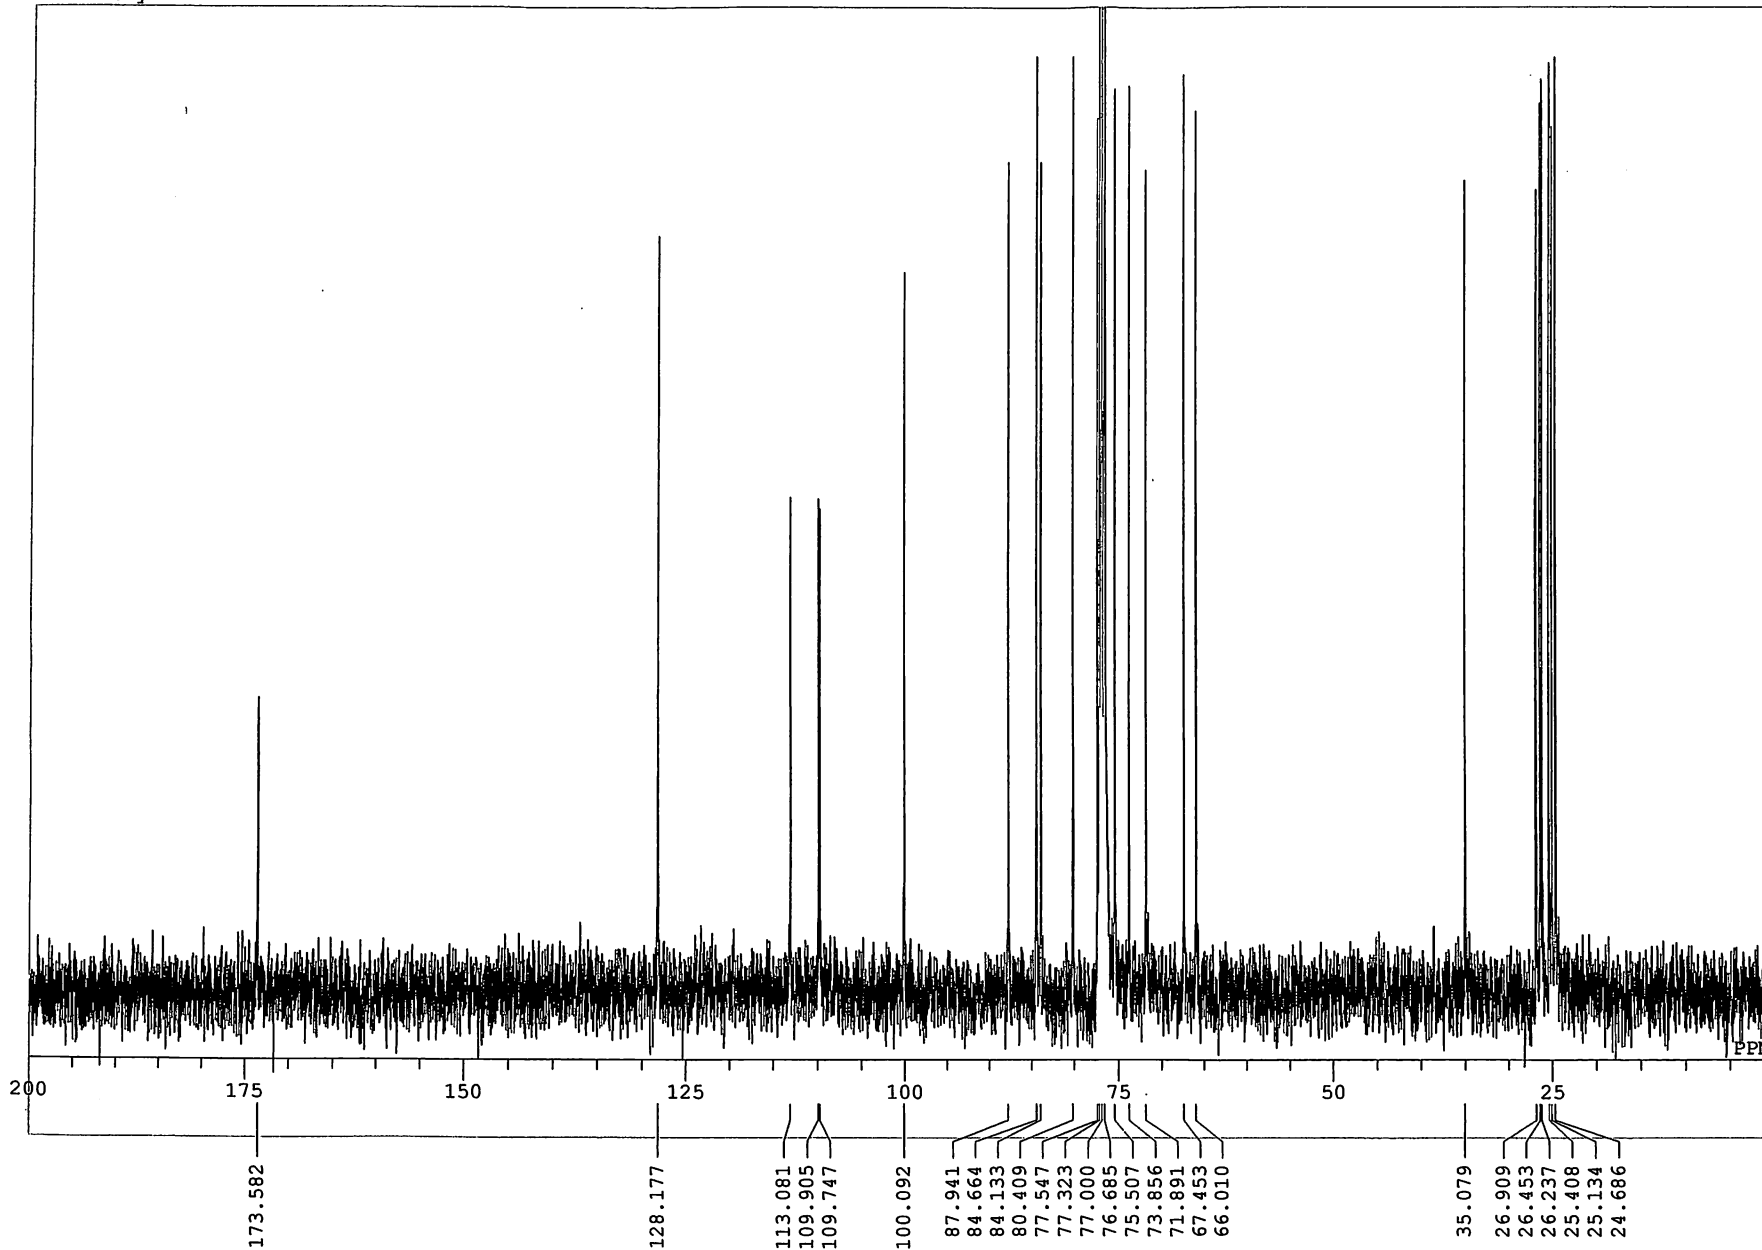

DFILE C:\WINNMR95\TEMPDATA\AUT  
COMNT NM.832cry  
DATIM Tue Dec 22 22:58:37 1998  
OBNUC 13C  
EXMOD BCM  
OBFRQ 100.40 MHz  
OBSET 125.00 KHz  
OBFIN 10500.0 Hz  
POINT 32768  
FREQU 27322.4 Hz  
SCANS 2056  
ACQTM 1.199 sec  
PD 1.797 sec  
PW1 4.8 us  
IRNUC 1H  
CTEMP 30.0 c  
SLVNT CDCL3  
EXREF 77.00 ppm  
BF 1.20 Hz  
RGAIN 26

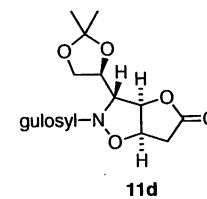

NM.889

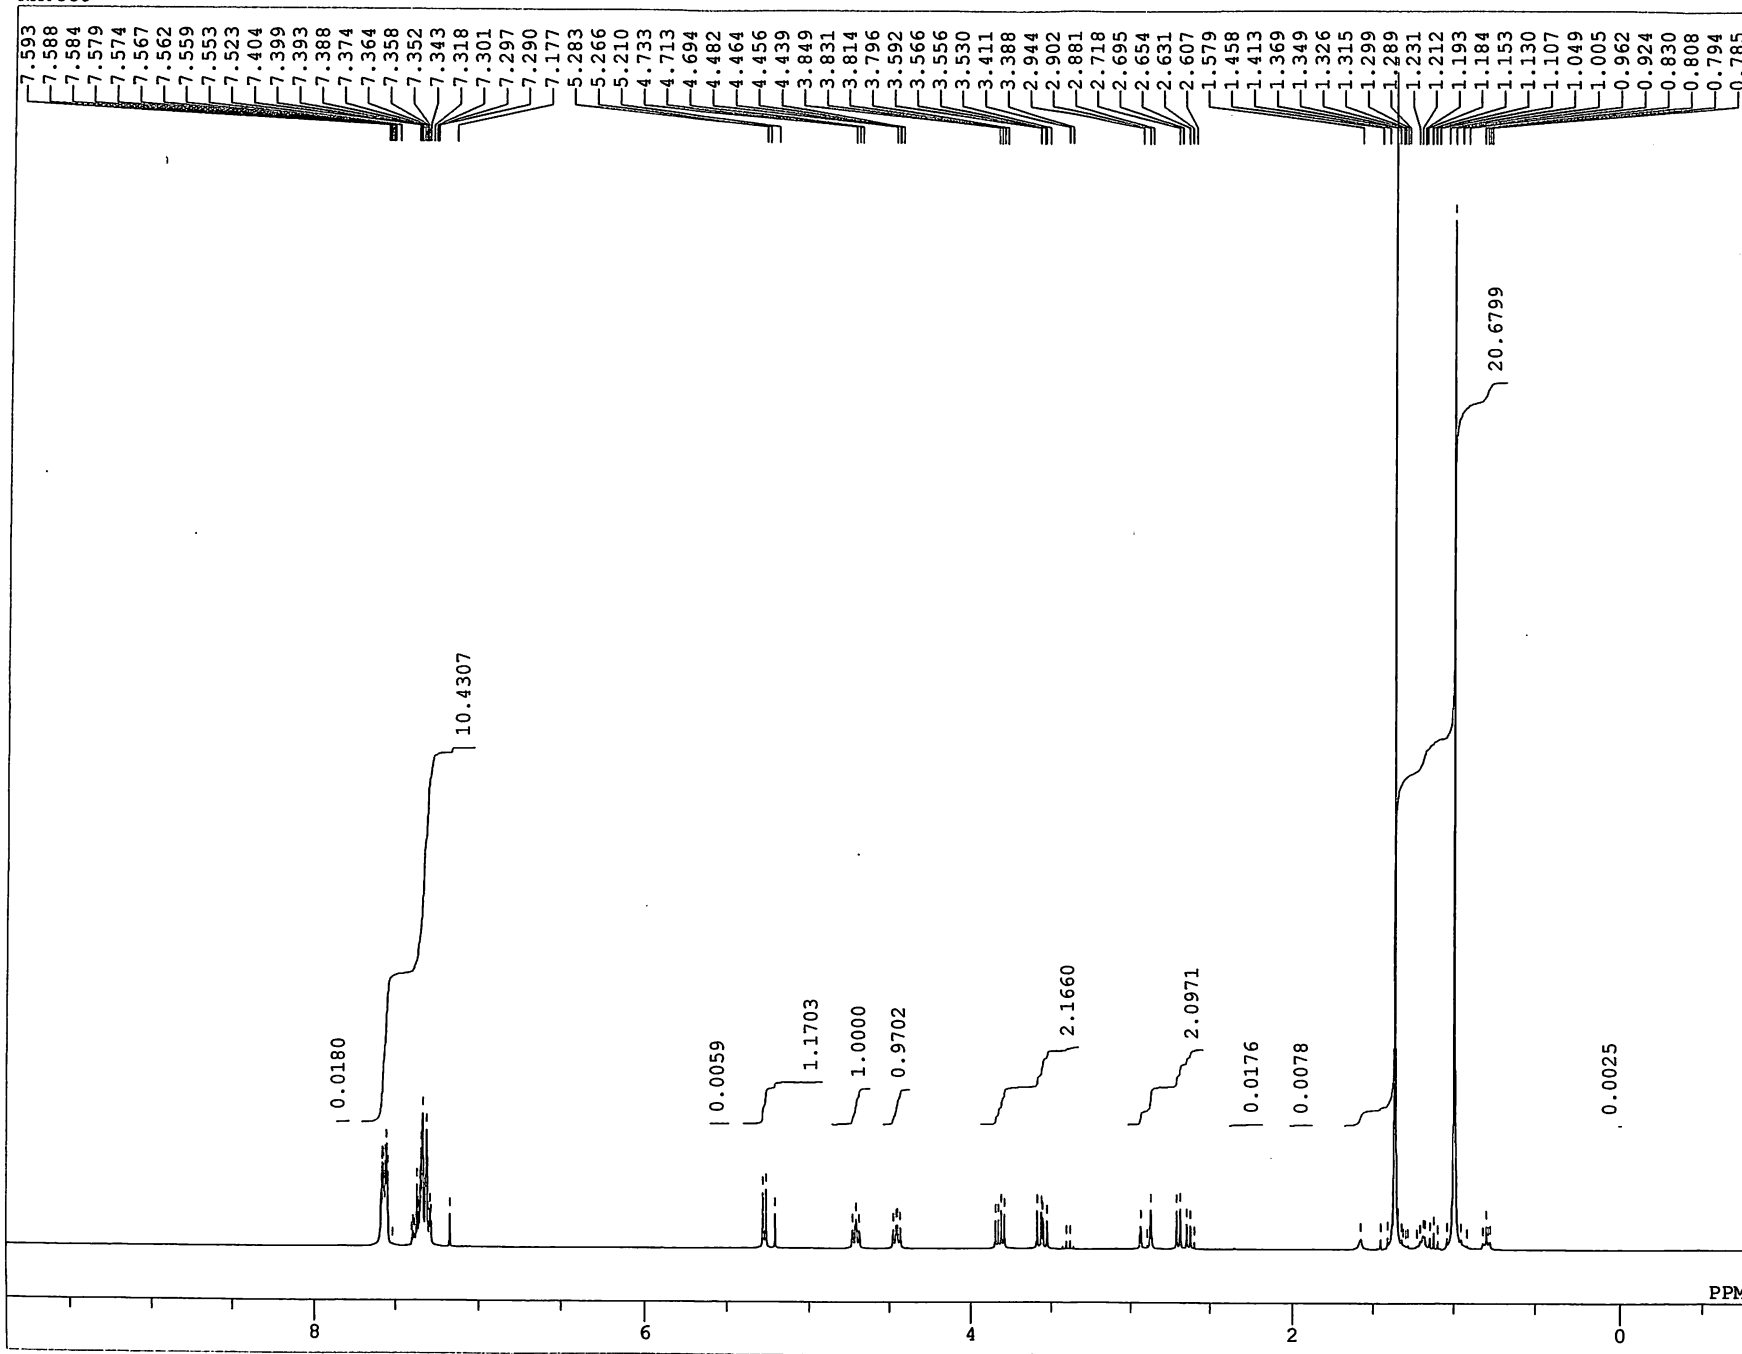

DFILE C:\WINNMR95\COMMON\\_DEF  
 COMNT NM.889  
 DATIM Wed Apr 07 14:08:42 1995  
 OBNUC 1H  
 EXMOD NON  
 OBFRQ 300.40 MHz  
 OBSET 130.00 KHz  
 OBFIN 1150.0 Hz  
 POINT 32768  
 FREQU 6002.4 Hz  
 SCANS 16  
 ACQTM 5.459 sec  
 PD 1.551 sec  
 PW1 5.8 us  
 IRNUC 1H  
 CTEMP 25.7 c  
 SLVNT CDCL3  
 EXREF 0.00 ppm  
 BF 0.09 Hz  
 RGAIN 12

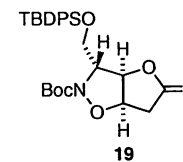

NM.889

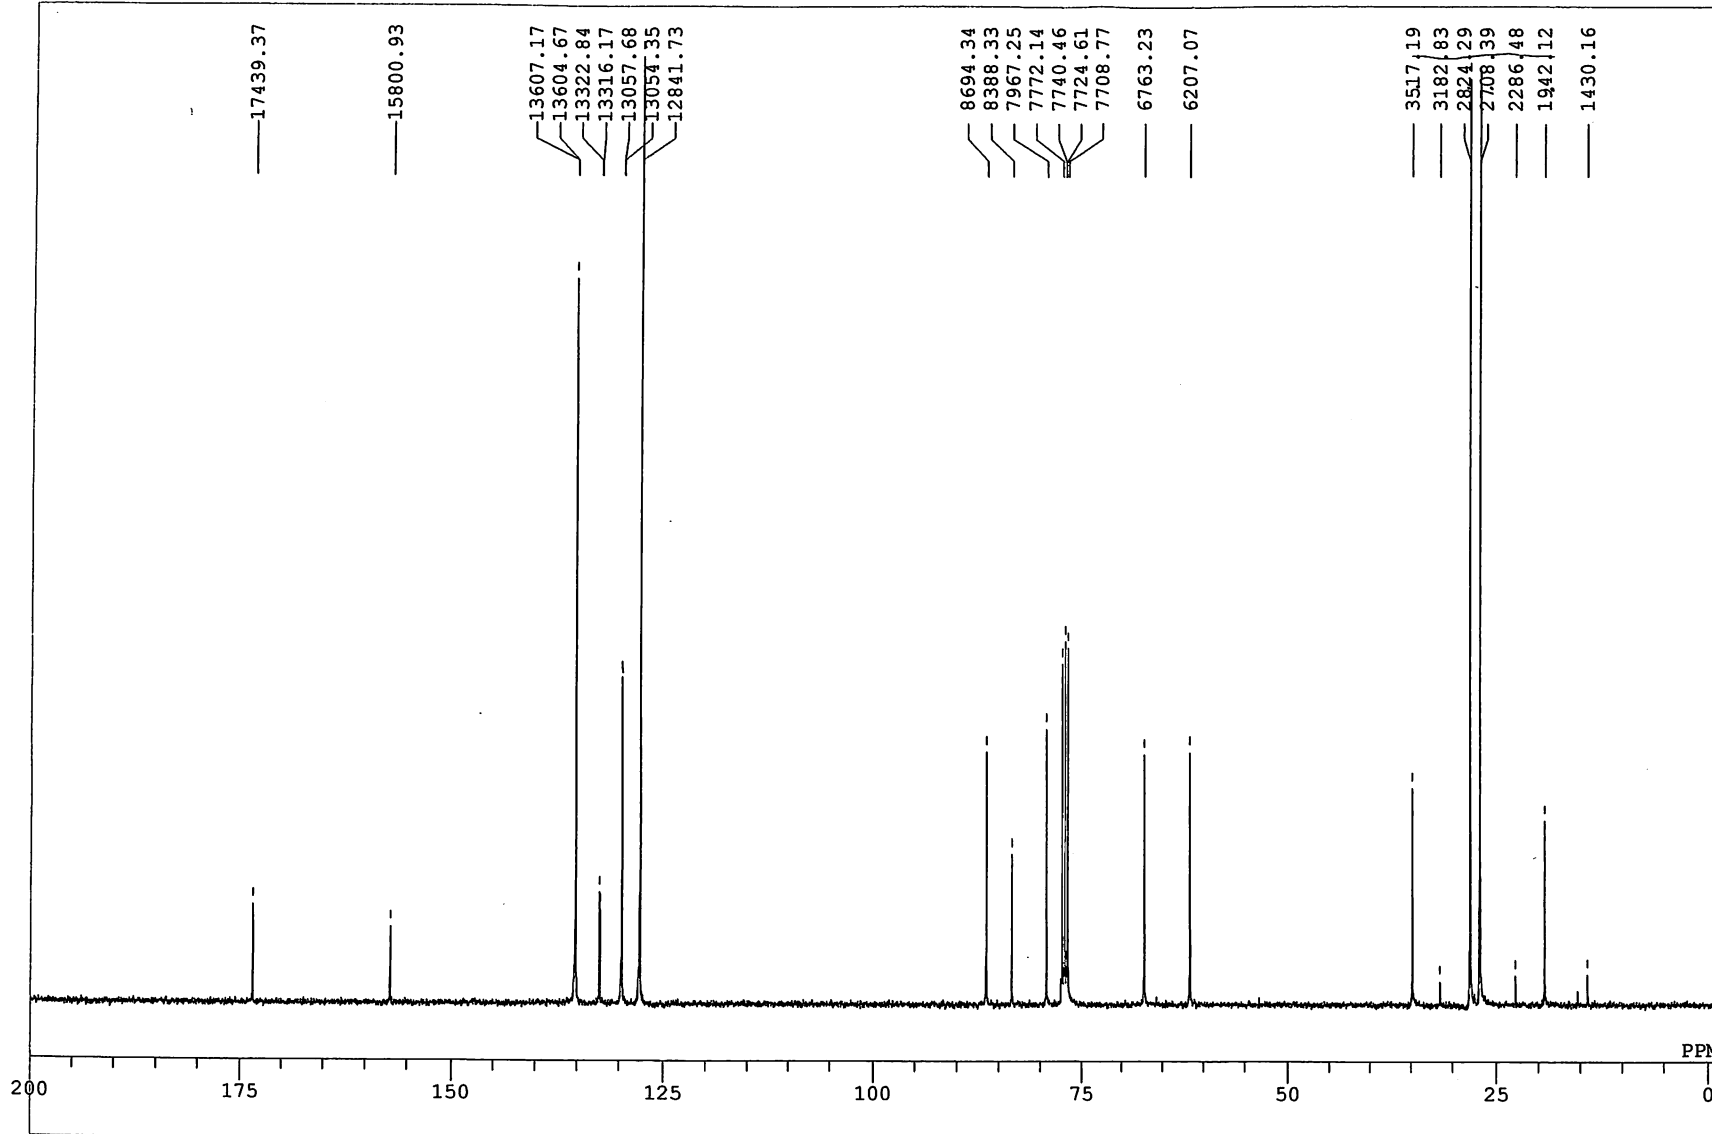

DFILE C:\WINNMR95\TEMPDATA\AUTO2BC  
 COMNT NM.889  
 DATIM Wed Apr 07 22:57:52 1999  
 OBNUC 13C  
 EXMOD BCM  
 OBFREQ 100.40 MHz  
 OBSET 125.00 KHz  
 OBFIN 10500.0 Hz  
 POINT 32768  
 FREQU 27322.4 Hz  
 SCANS 2048  
 ACQTM 1.199 sec  
 PD 1.797 sec  
 PW1 4.8 us  
 IRNUC 1H  
 CTEMP 29.5 c  
 SLVNT CDCL3  
 EXREF 77.00 ppm  
 BF 1.20 Hz  
 RGAIN 24

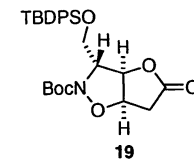

NM.991Fr6-12

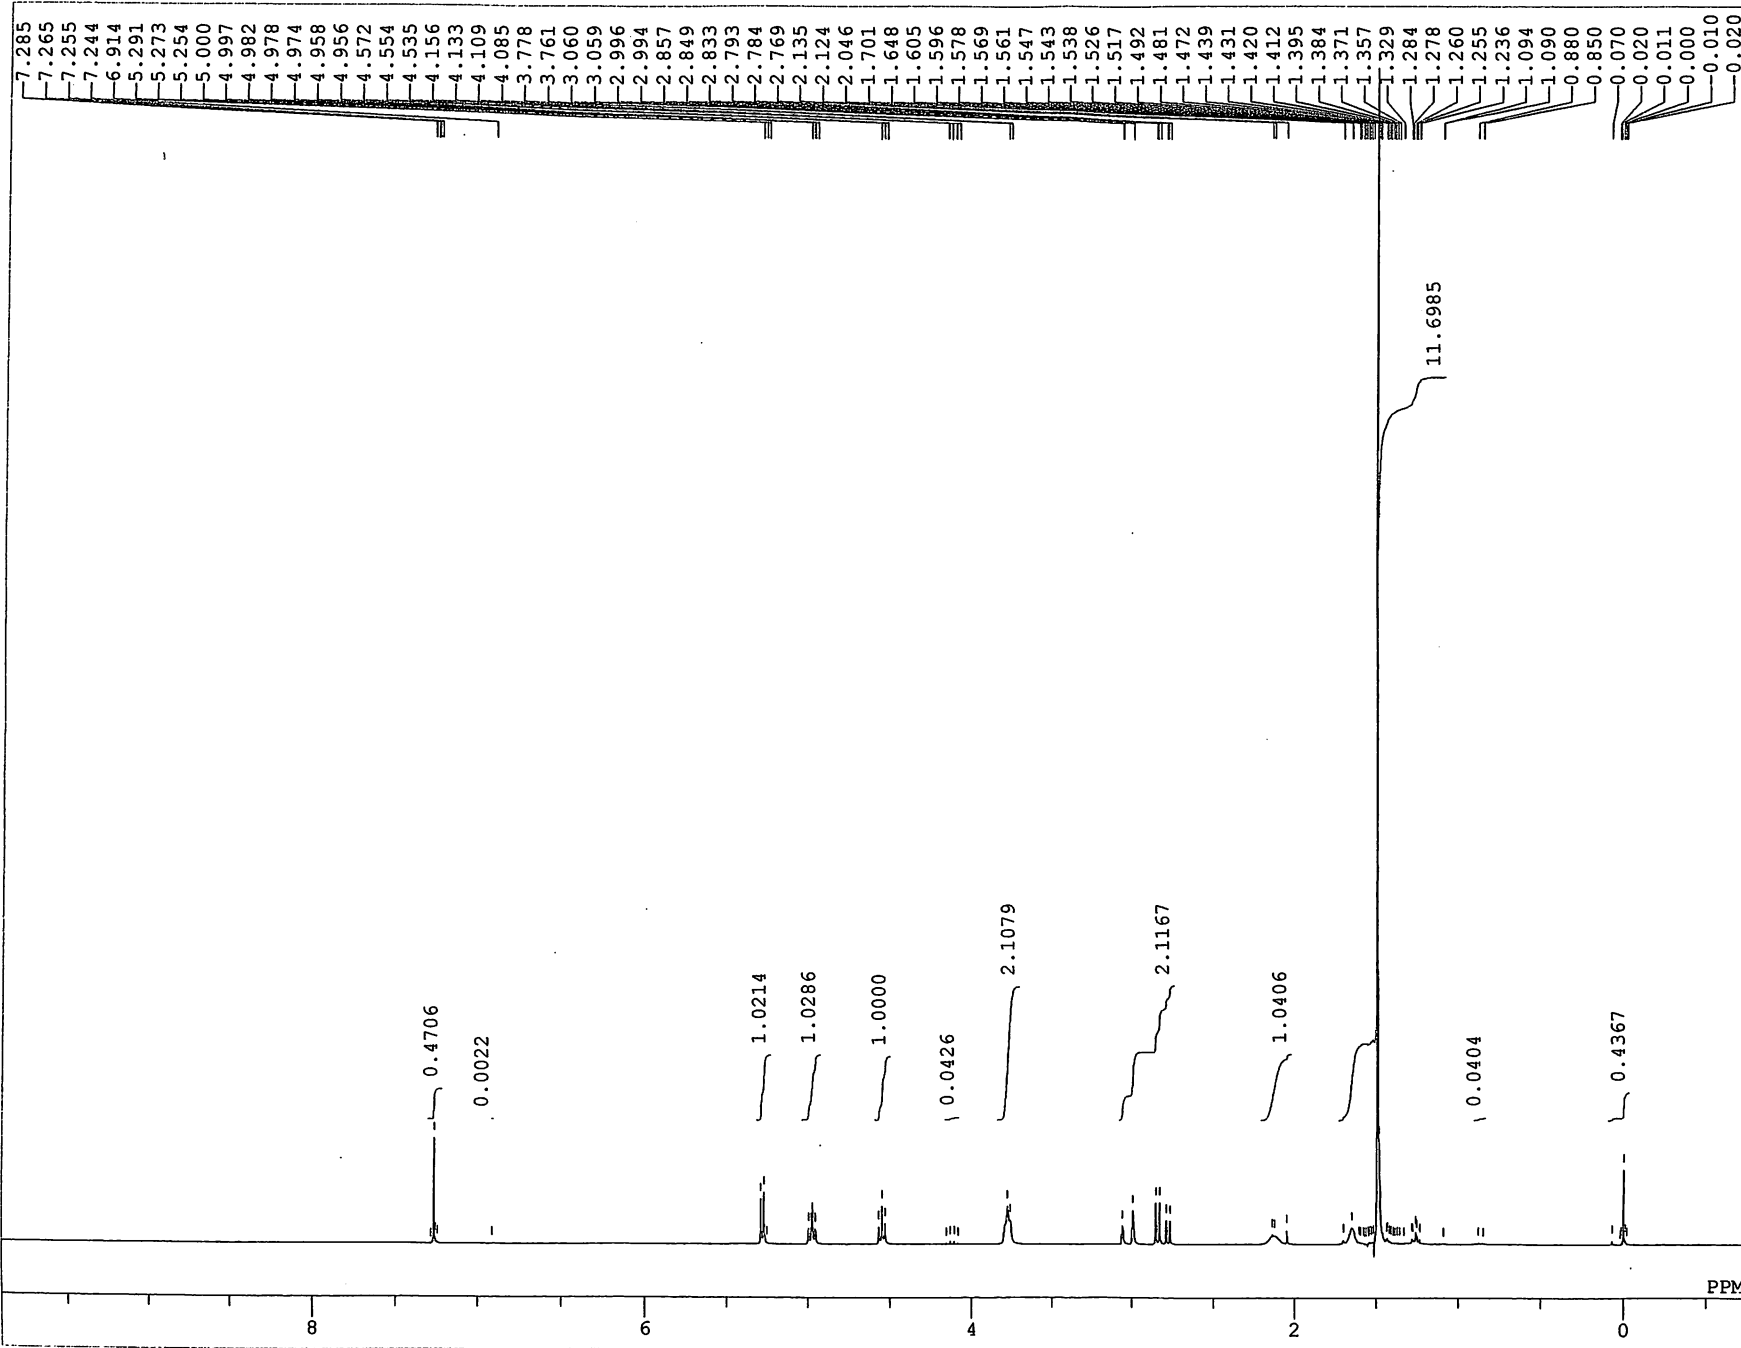

DFILE C:\WINNMR95\COMMON\\_DEF  
 COMNT NM.991Fr6-12  
 DATIM Wed Oct 20 18:13:55 1995  
 OBNUC 1H  
 EXMOD NON  
 OBFRQ 300.40 MHz  
 OBSET 130.00 KHz  
 OBFIN 1150.0 Hz  
 POINT 32768  
 FREQU 6013.2 Hz  
 SCANS 16  
 ACQTM 5.449 sec  
 PD 1.551 sec  
 PW1 5.8 us  
 IRNUC 1H  
 CTEMP 24.4 c  
 SLVNT CDCL3  
 EXREF 0.00 ppm  
 BF 0.09 Hz  
 RGAIN 16

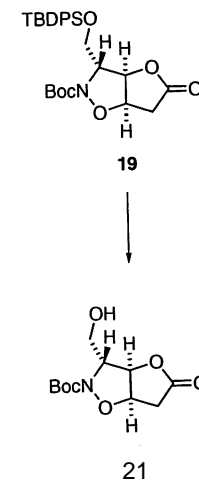

NM.991Fr6-12

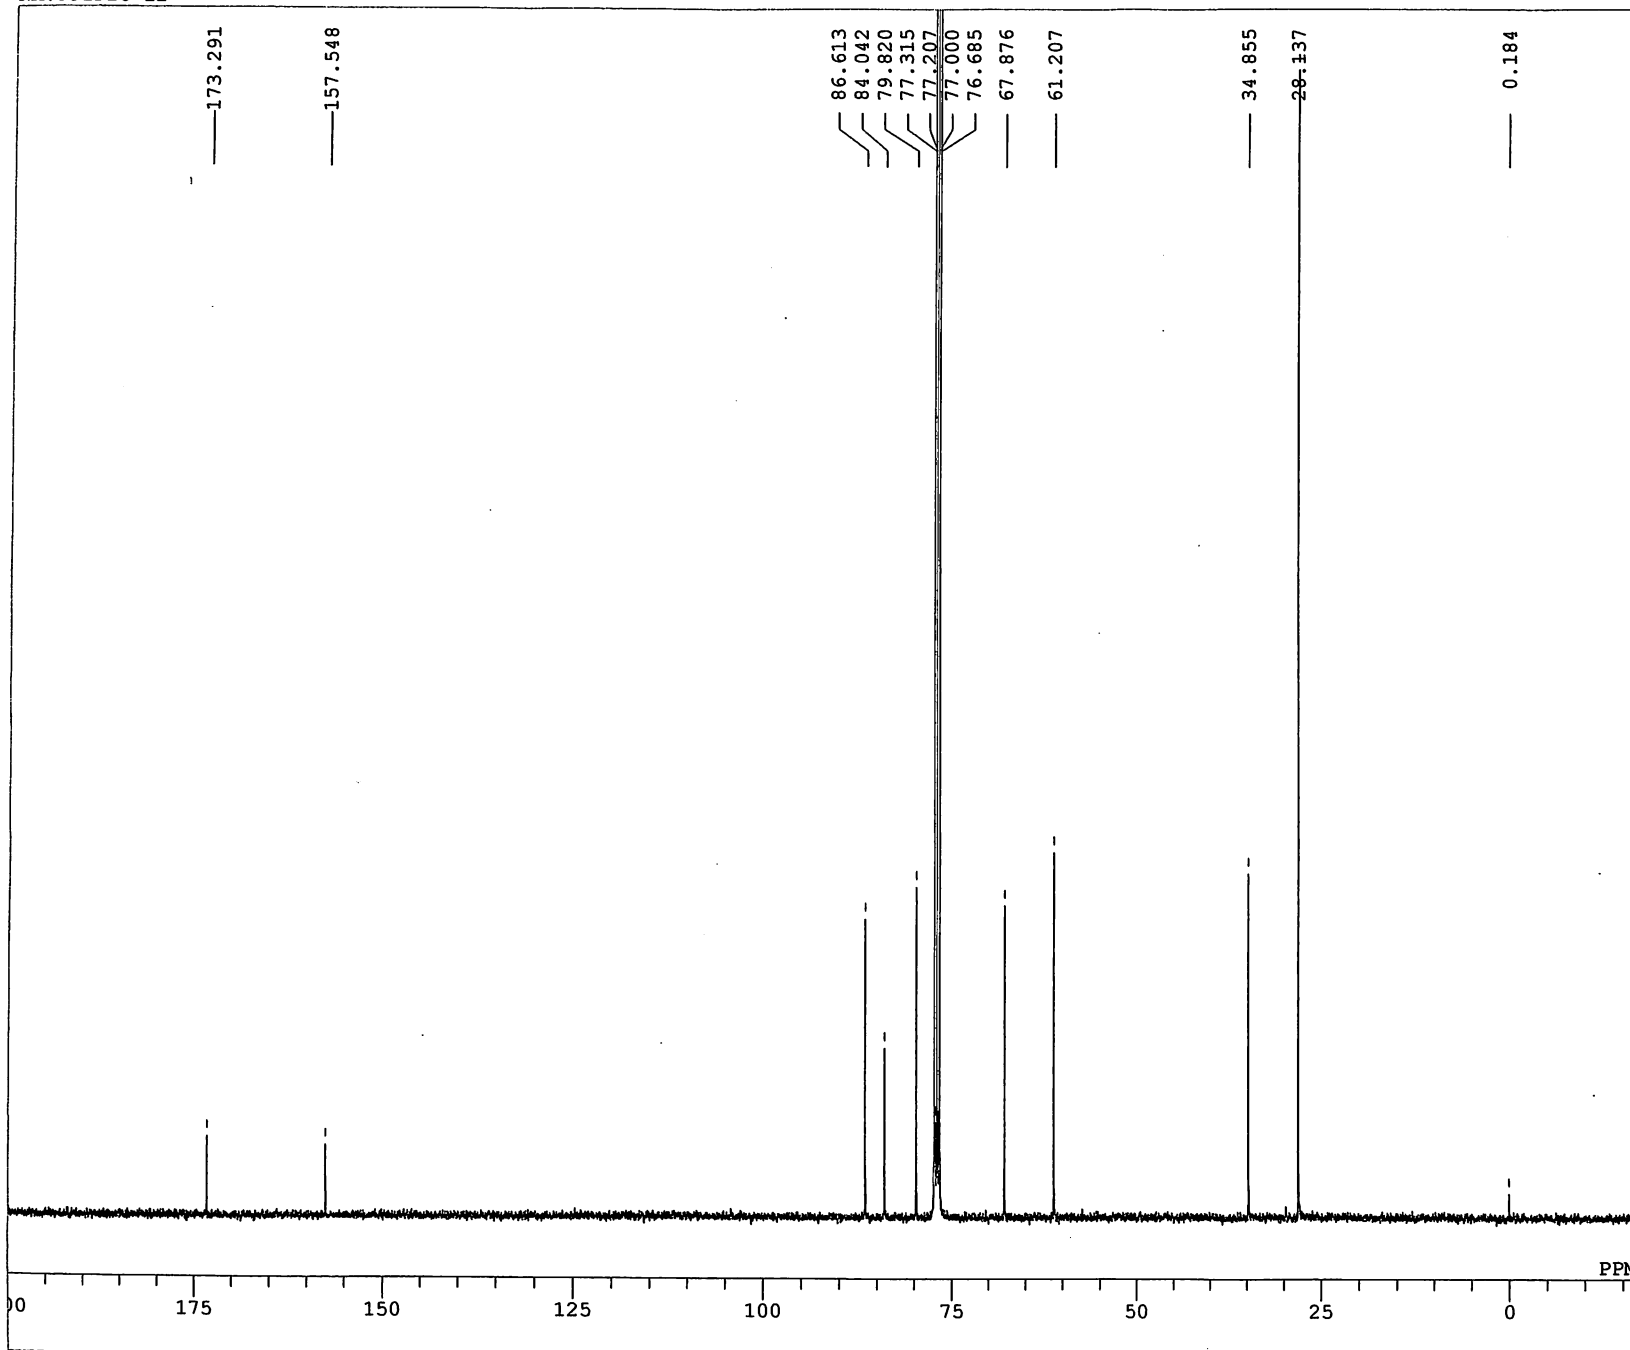

DFILE C:\WINMR95\TEMPDATA\AUTO1BCM\_E1\_FT.1  
COMNT NM.991Fr6-12  
DATIM Sat Oct 23 05:26:08 1999  
OBNUC 13C  
EXMOD BCM  
OBFRQ 100.40 MHz  
OBSET 125.00 KHz  
OBFIN 10500.0 Hz  
POINT 32768  
FREQU 27322.4 Hz  
SCANS 10000  
ACQTM 1.199 sec  
PD 1.797 sec  
PW1 4.8 us  
IRNUC 1H  
CTEMP 30.2 c  
SLVNT CDCL3  
EXREF 77.00 ppm  
BF 1.20 Hz  
RGAIN 26

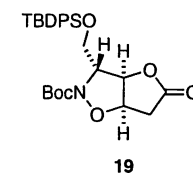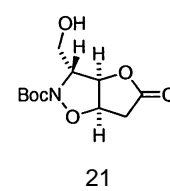

diol

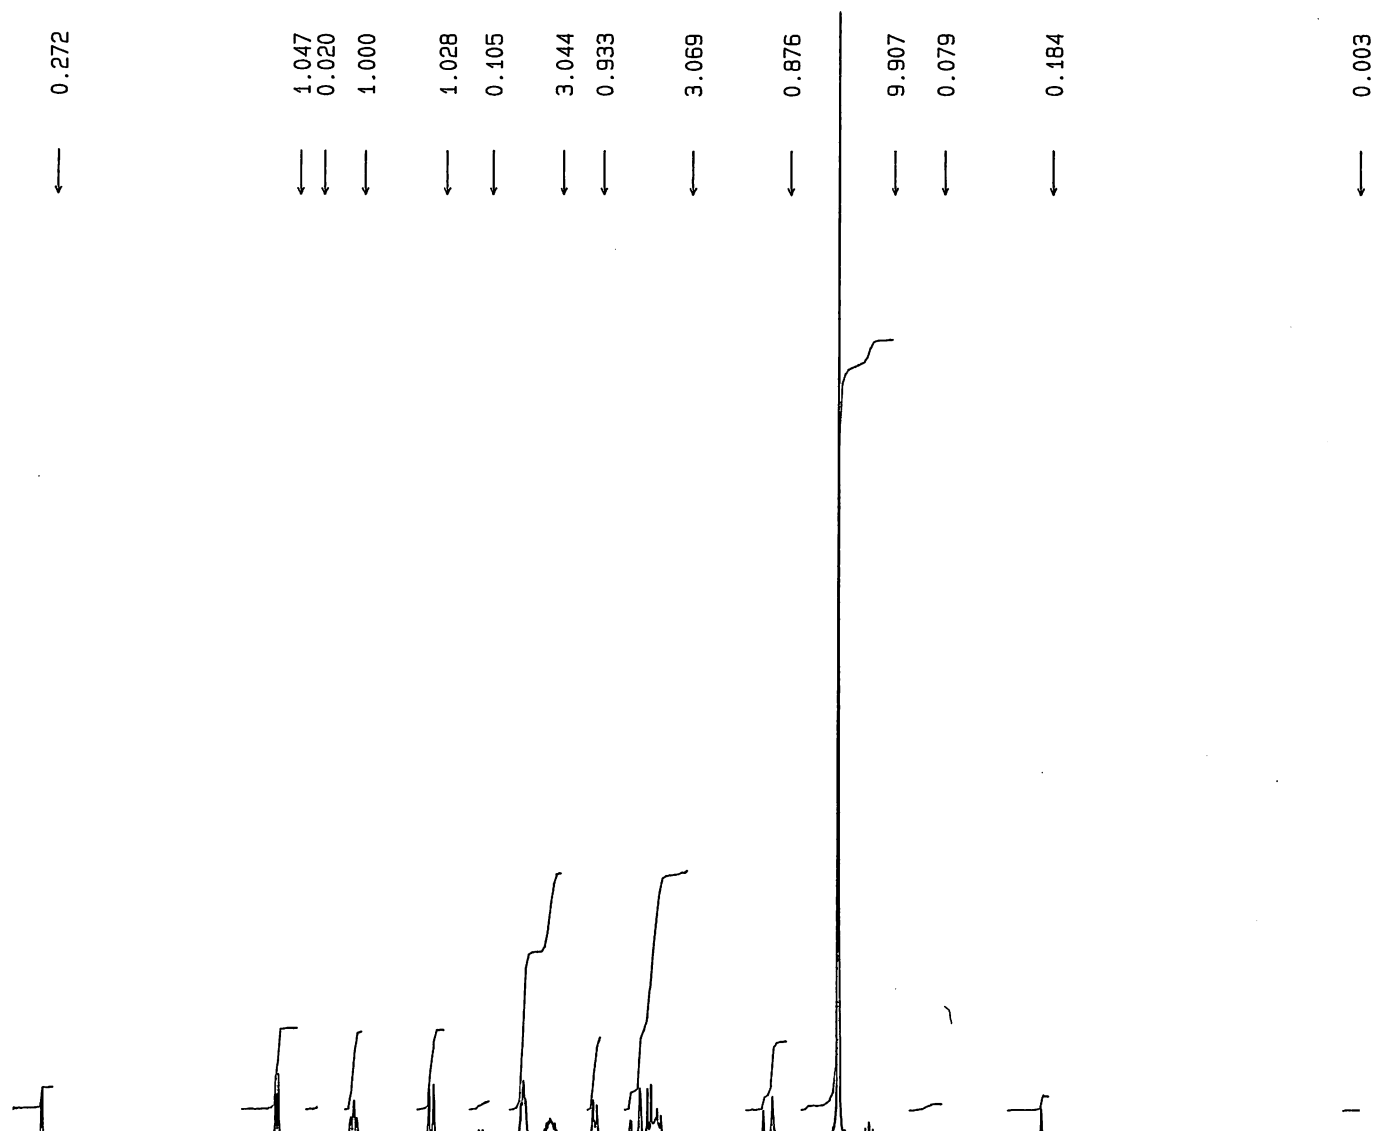

18-NOV-99 18: 09: 20  
DFILE Q1H  
OBNUC 1H  
EXMOD NON  
QFR 270.05 MHz  
OBSET 112.00 kHz  
OBFIN 5800.0 Hz  
POINT 32768  
FREQU 5405.4 Hz  
SCANS 16  
ACQTM 3.031 sec  
PD 3.969 sec  
PW1 5.5 us  
IRNUC 1H  
CTEMP 24.8 c  
SLVNT CDCL3  
EXREF 0.00 ppm  
BF 0.16 Hz  
RGAIN 17  
OPERATOR : \_\_\_\_\_

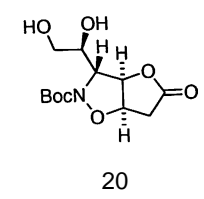

9 8 7 6 5 4 3 2 1 0 -1 -2 PPM

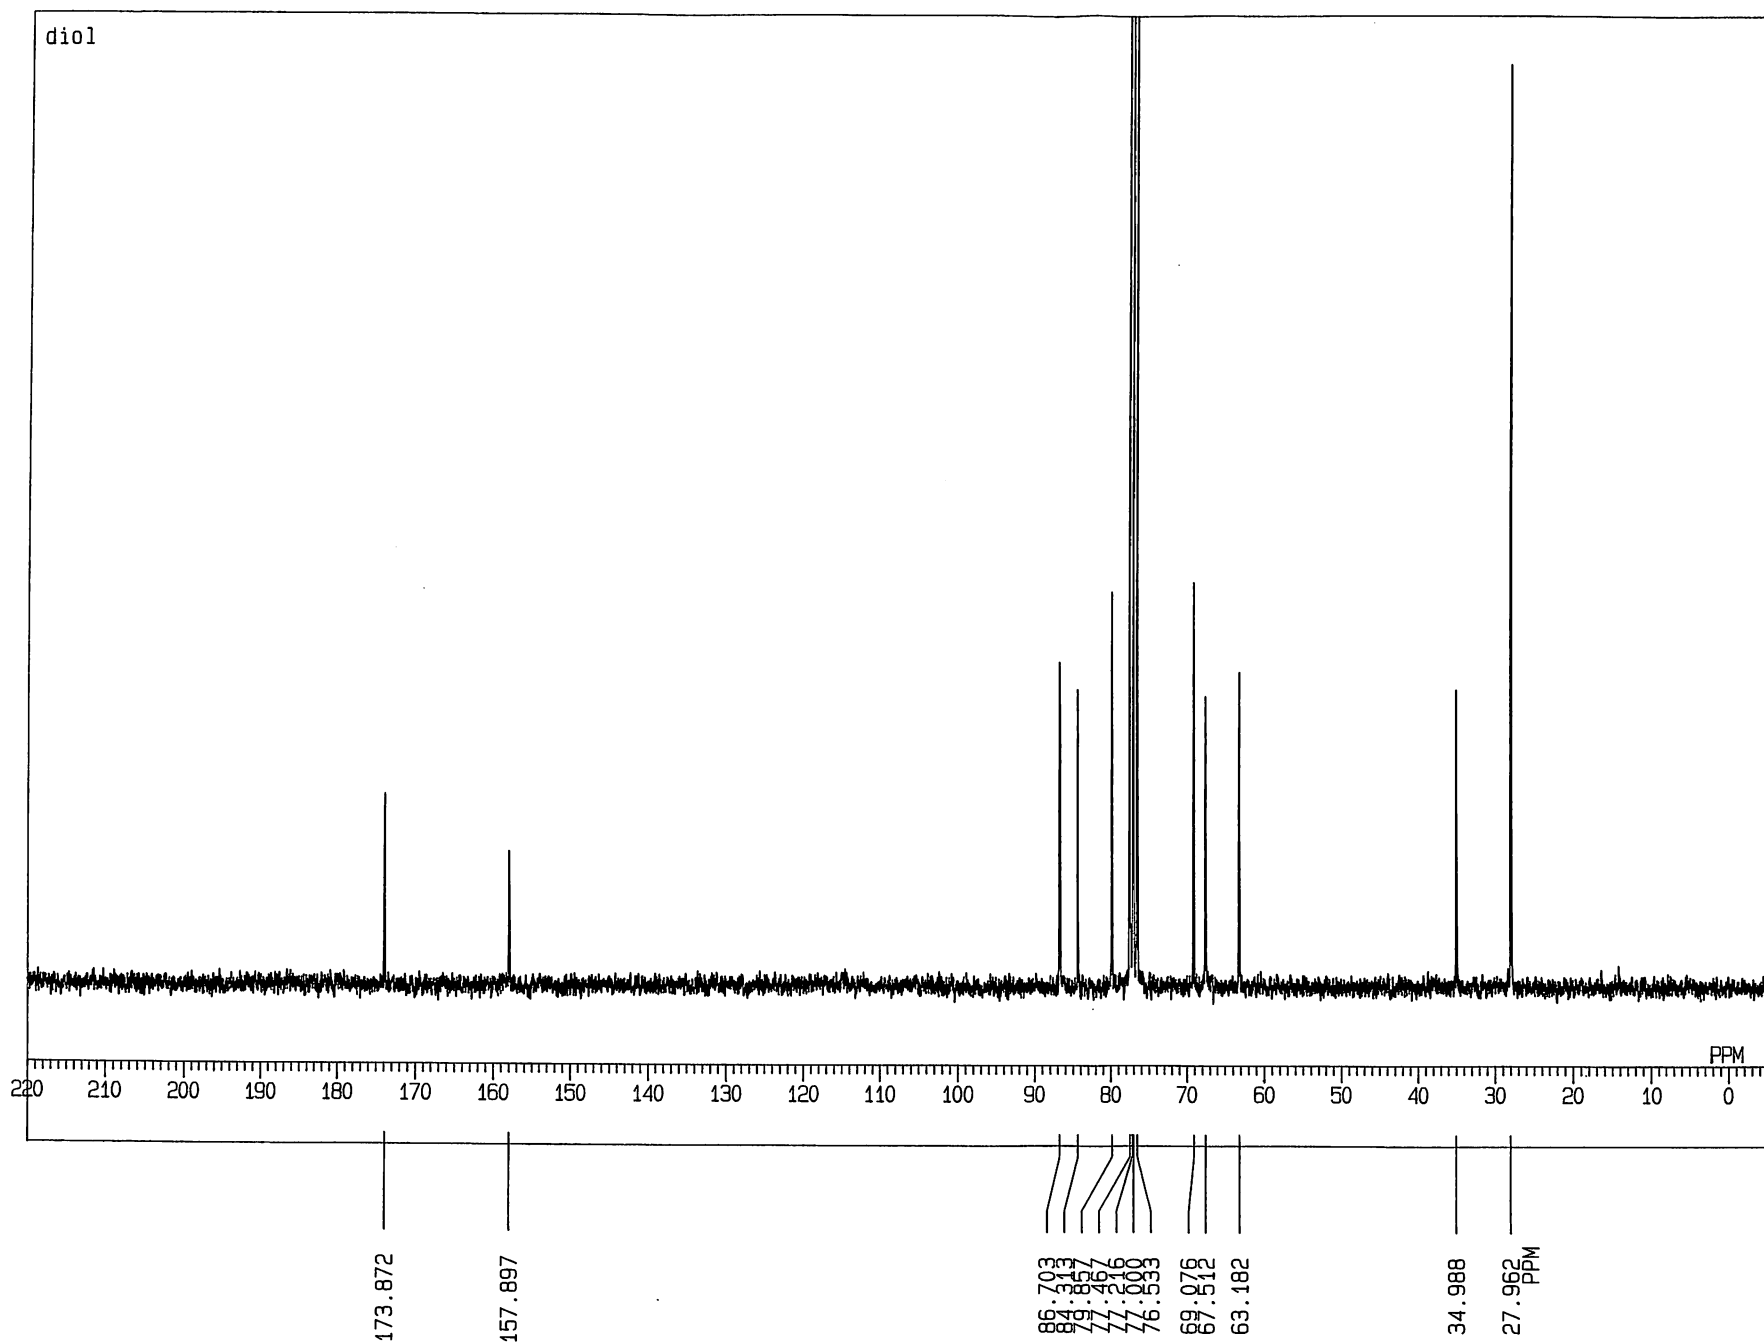

18-NOV-99 21: 45: 06  
DFILE Q13C  
OBNUC 13C  
EXMOD BCM  
OFR 67.80 MHz  
OBSET 135.00 kHz  
OBFIN 5200.0 Hz  
POINT 32768  
FREQU 20000.0 Hz  
SCANS 1599  
ACQTM 0.819 sec  
PD 2.181 sec  
PW1 4.3 us  
IRNUC 1H  
CTEMP 26.3 c  
SLVNT CDCL3  
EXREF 77.00 ppm  
BF 1.50 Hz  
RGAIN 29  
OPERATOR : \_\_\_\_\_

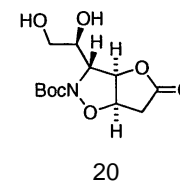

NM.886

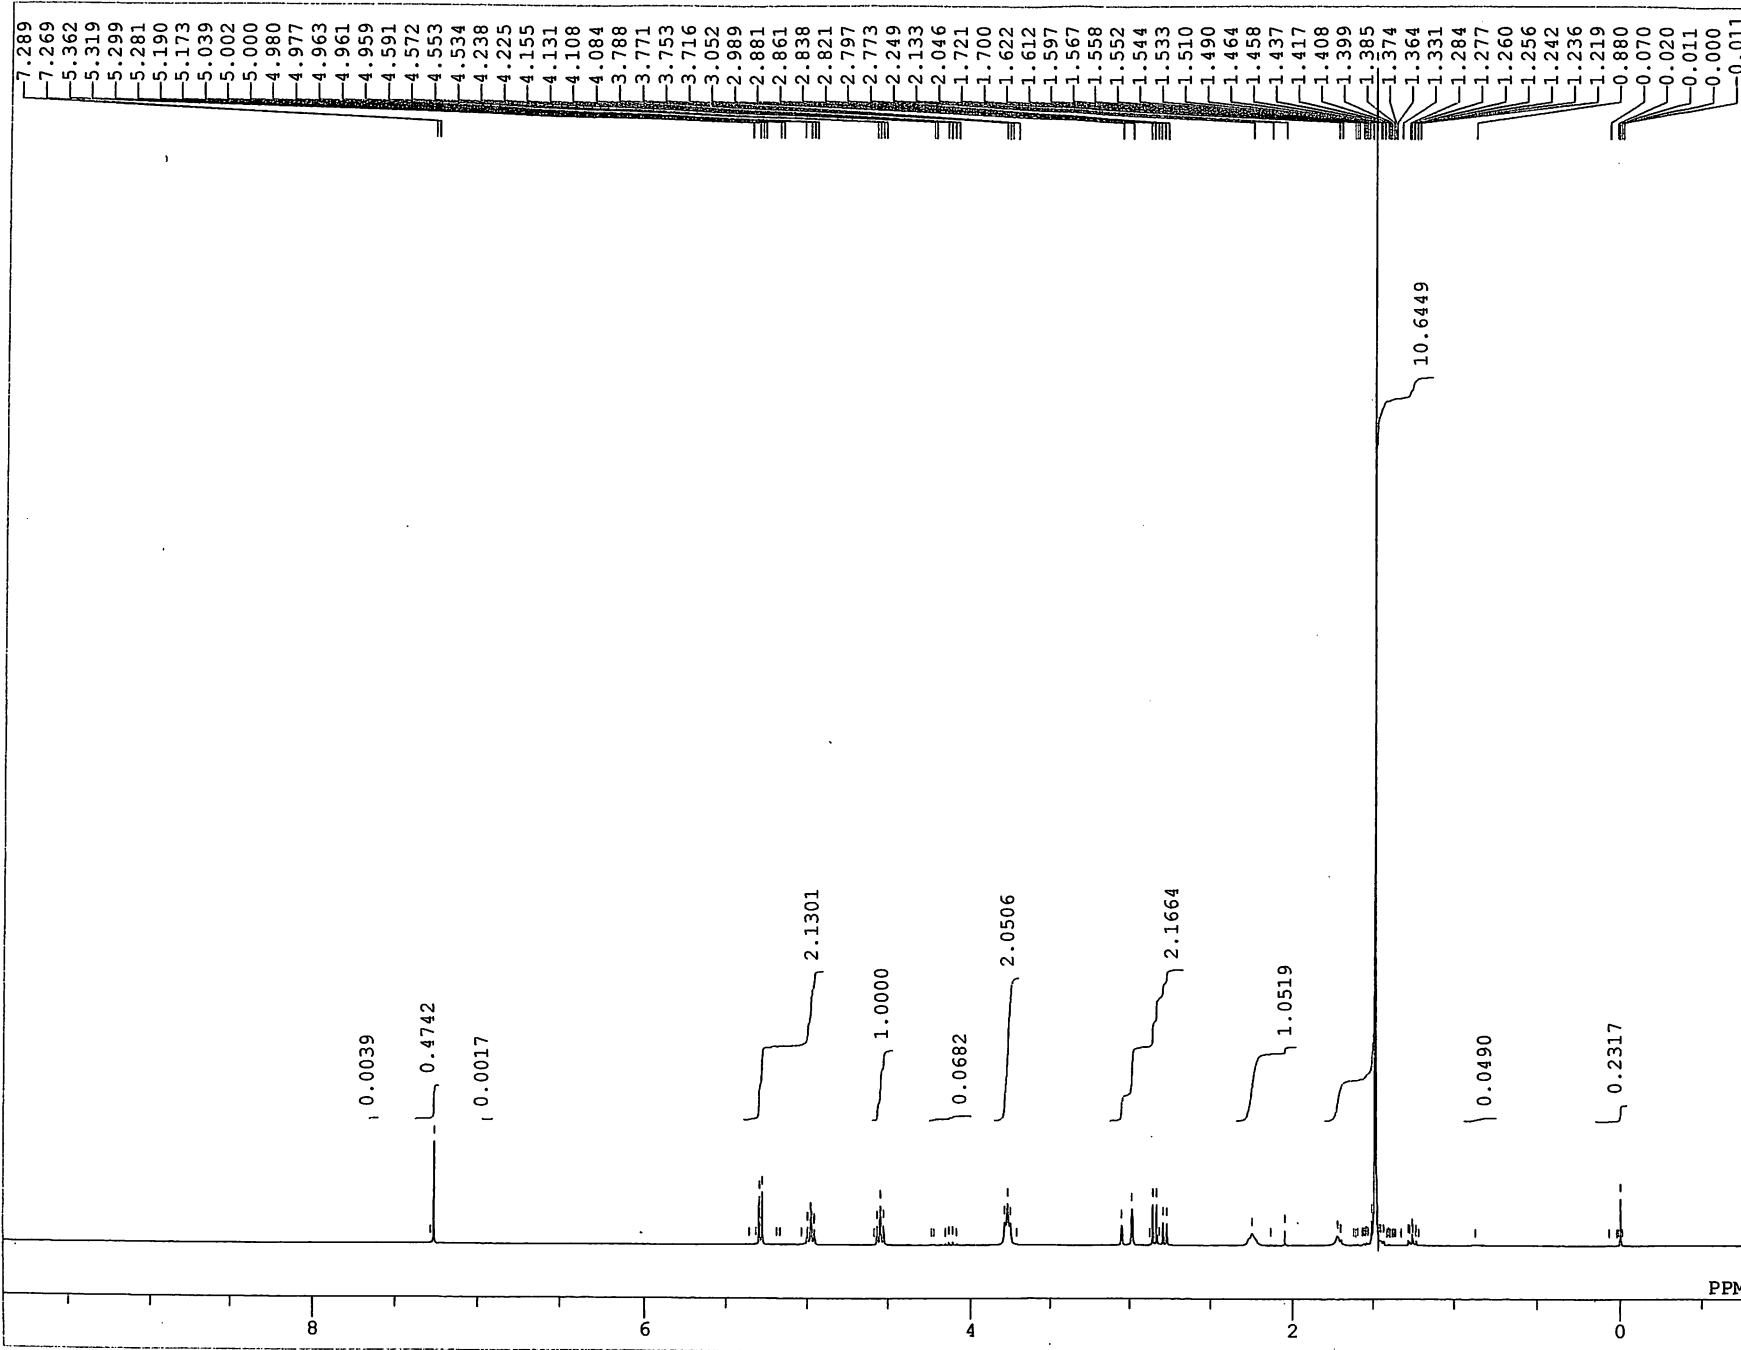

DFILE C:\WINNMR95\COMMON\\_DEFF  
 COMNT NM.886  
 DATIM Thu Oct 21 11:43:29 1995  
 OBNUC 1H  
 EXMOD NON  
 OBFREQ 300.40 MHz  
 OBSET 130.00 KHz  
 OBFIN 1150.0 Hz  
 POINT 32768  
 FREQU 6013.2 Hz  
 SCANS 16  
 ACQTM 5.449 sec  
 PD 1.551 sec  
 PW1 5.8 us  
 IRNUC 1H  
 CTEMP 24.4 c  
 SLVNT CDCL3  
 EXREF 0.00 ppm  
 BF 0.09 Hz  
 RGAIN 15

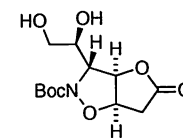

20

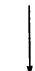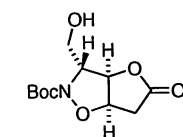

21



NM.886

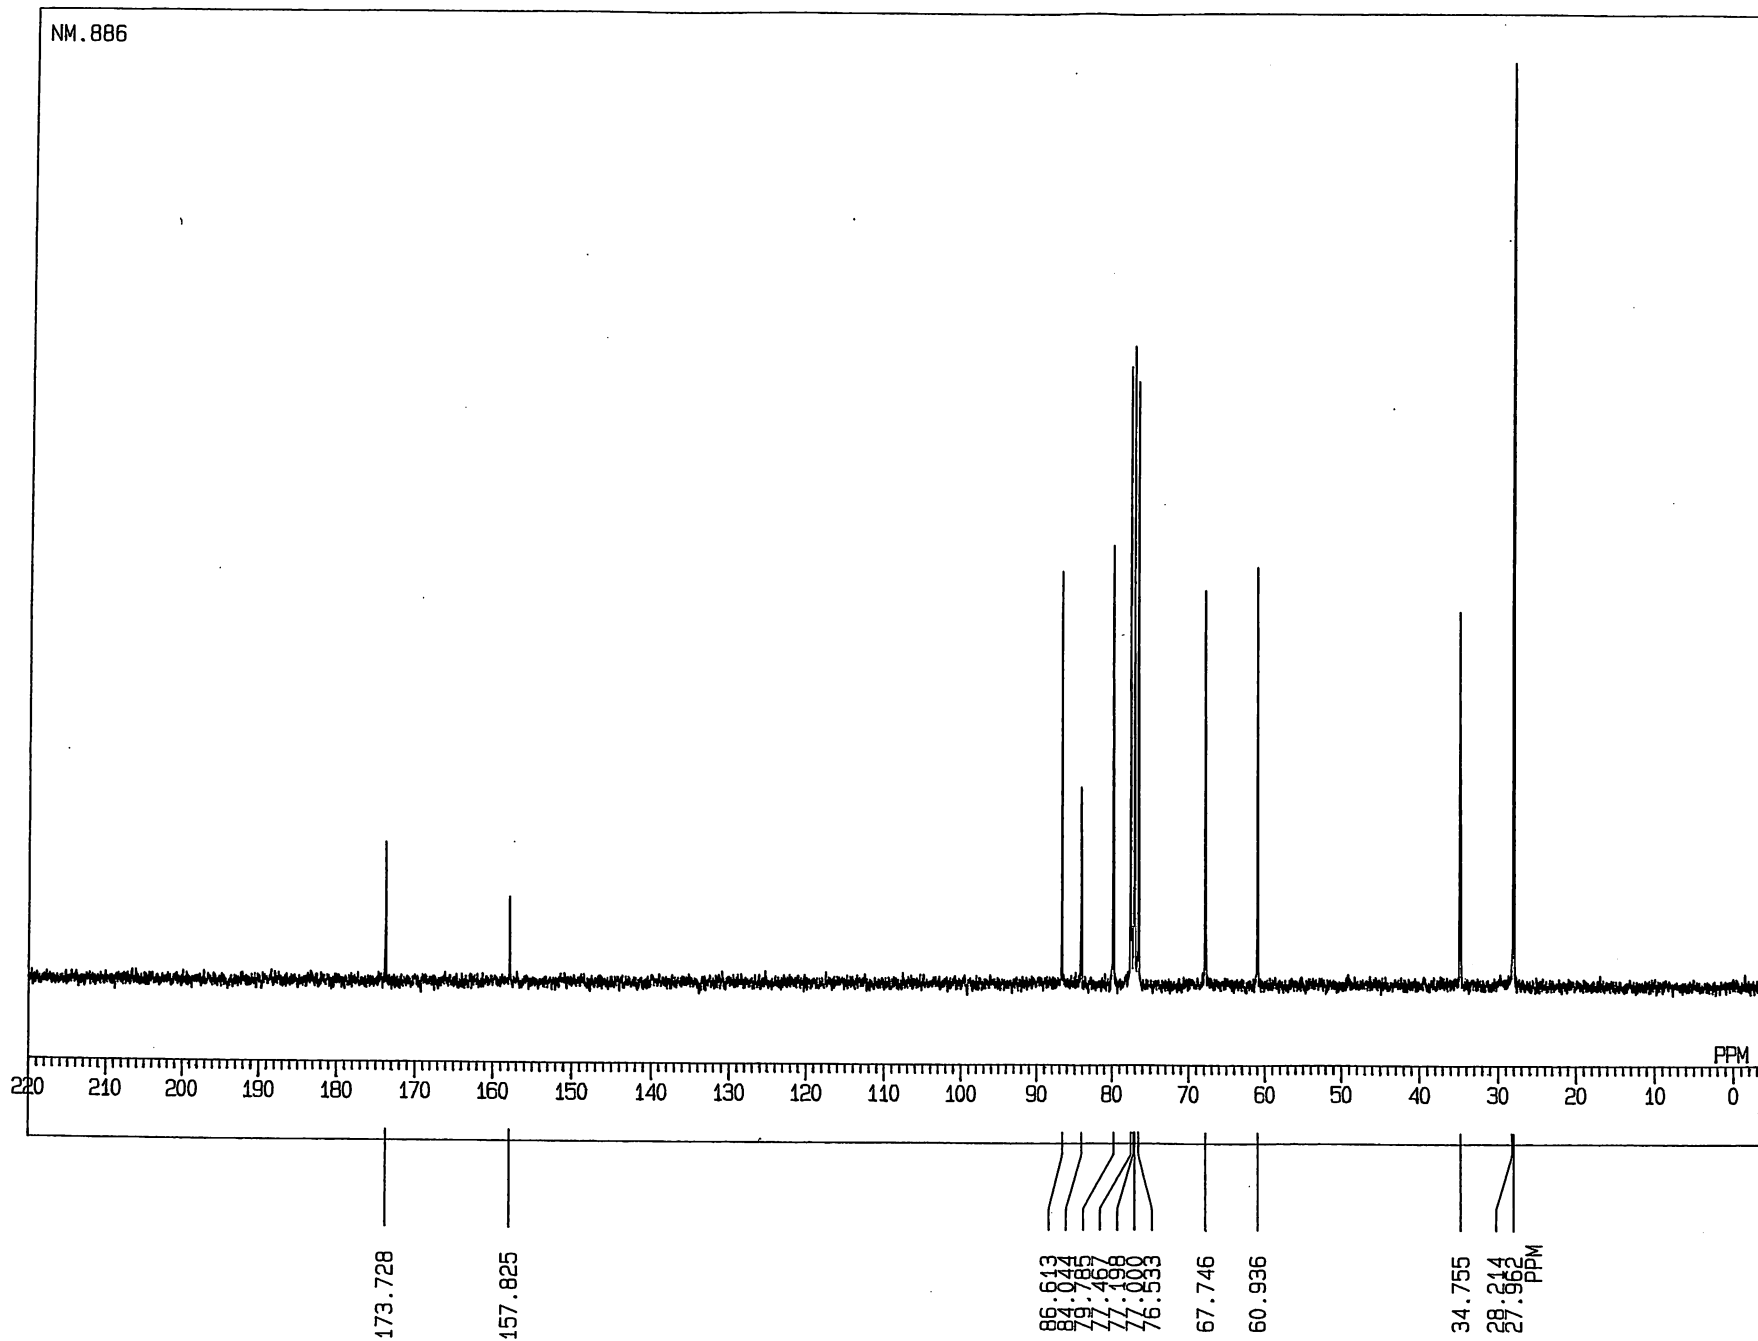

21-OCT-99 20: 44: 19

DFILE Q13C

OBNUC 13C

EXMOD BCM

OFR 67.80 MHz

OBSET 135.00 kHz

OBFIN 5200.0 Hz

POINT 32768

FREQU 20000.0 Hz

SCANS 1600

ACQTM 0.819 sec

PD 2.181 sec

PW1 4.3 us

IRNUC 1H

CTEMP 25.7 c

SLVNT CDCL3

EXREF 77.00 ppm

BF 1.50 Hz

RGAIN 30

OPERATOR : \_\_\_\_\_

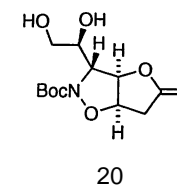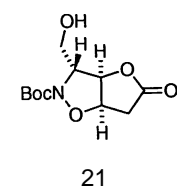

NM.1023Fr5-9

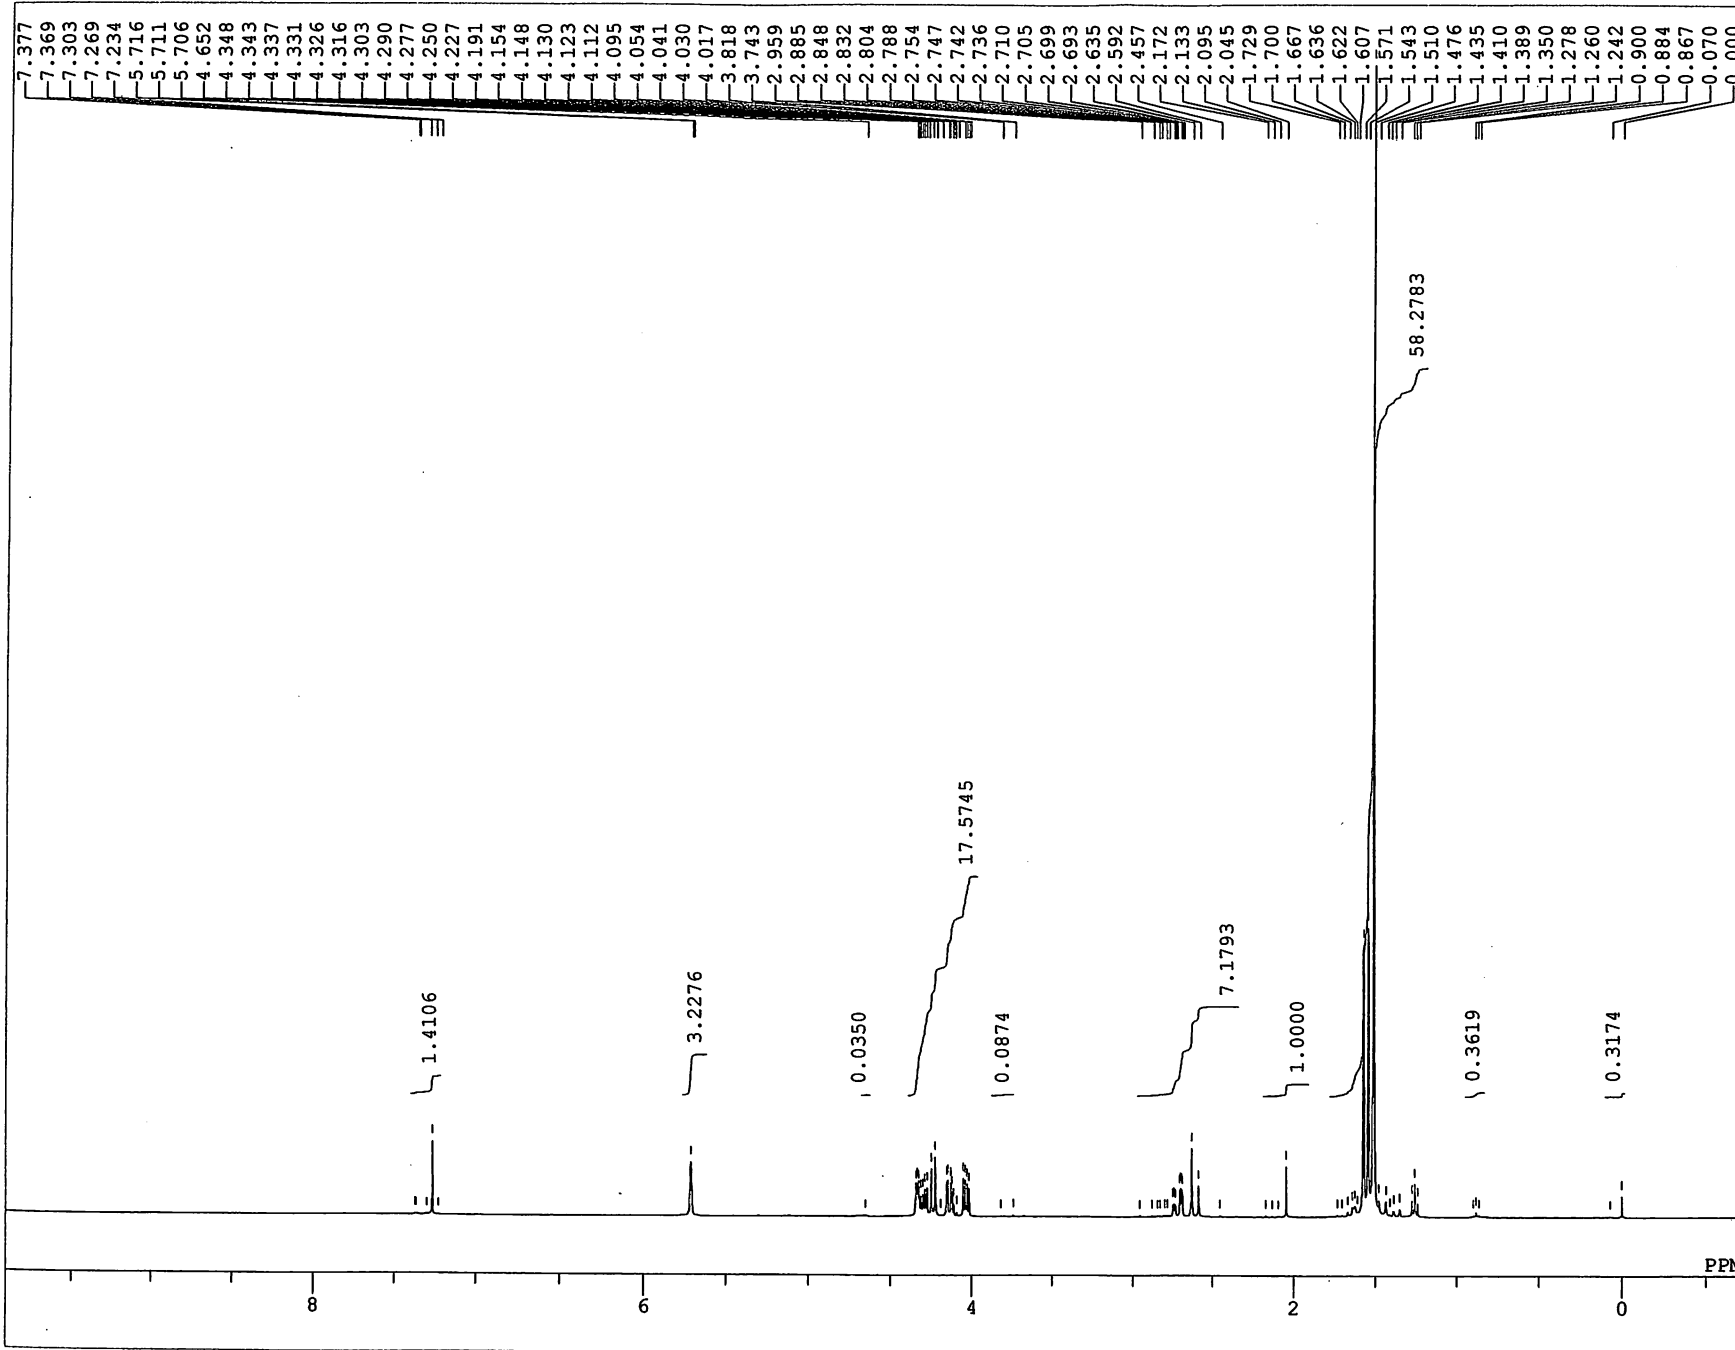

DFILE C:\WINNMR95\COMMON\\_DEFAULT.  
COMNT NM.1023Fr5-9  
DATIM Fri Jan 21 10:27:27 2000  
OBNUC 1H  
EXMOD NON  
OBFRQ 399.65 MHz  
OBSET 124.00 KHz  
OBFIN 10500.0 Hz  
POINT 32768  
FREQU 8000.0 Hz  
SCANS 16  
ACQTM 4.096 sec  
PD 3.967 sec  
PW1 5.0 us  
IRNUC 1H  
CTEMP 25.0 c  
SLVNT CDCL3  
EXREF 0.00 ppm  
BF 0.12 Hz  
RGAIN 16

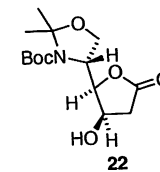

NM.1023Fr5-9

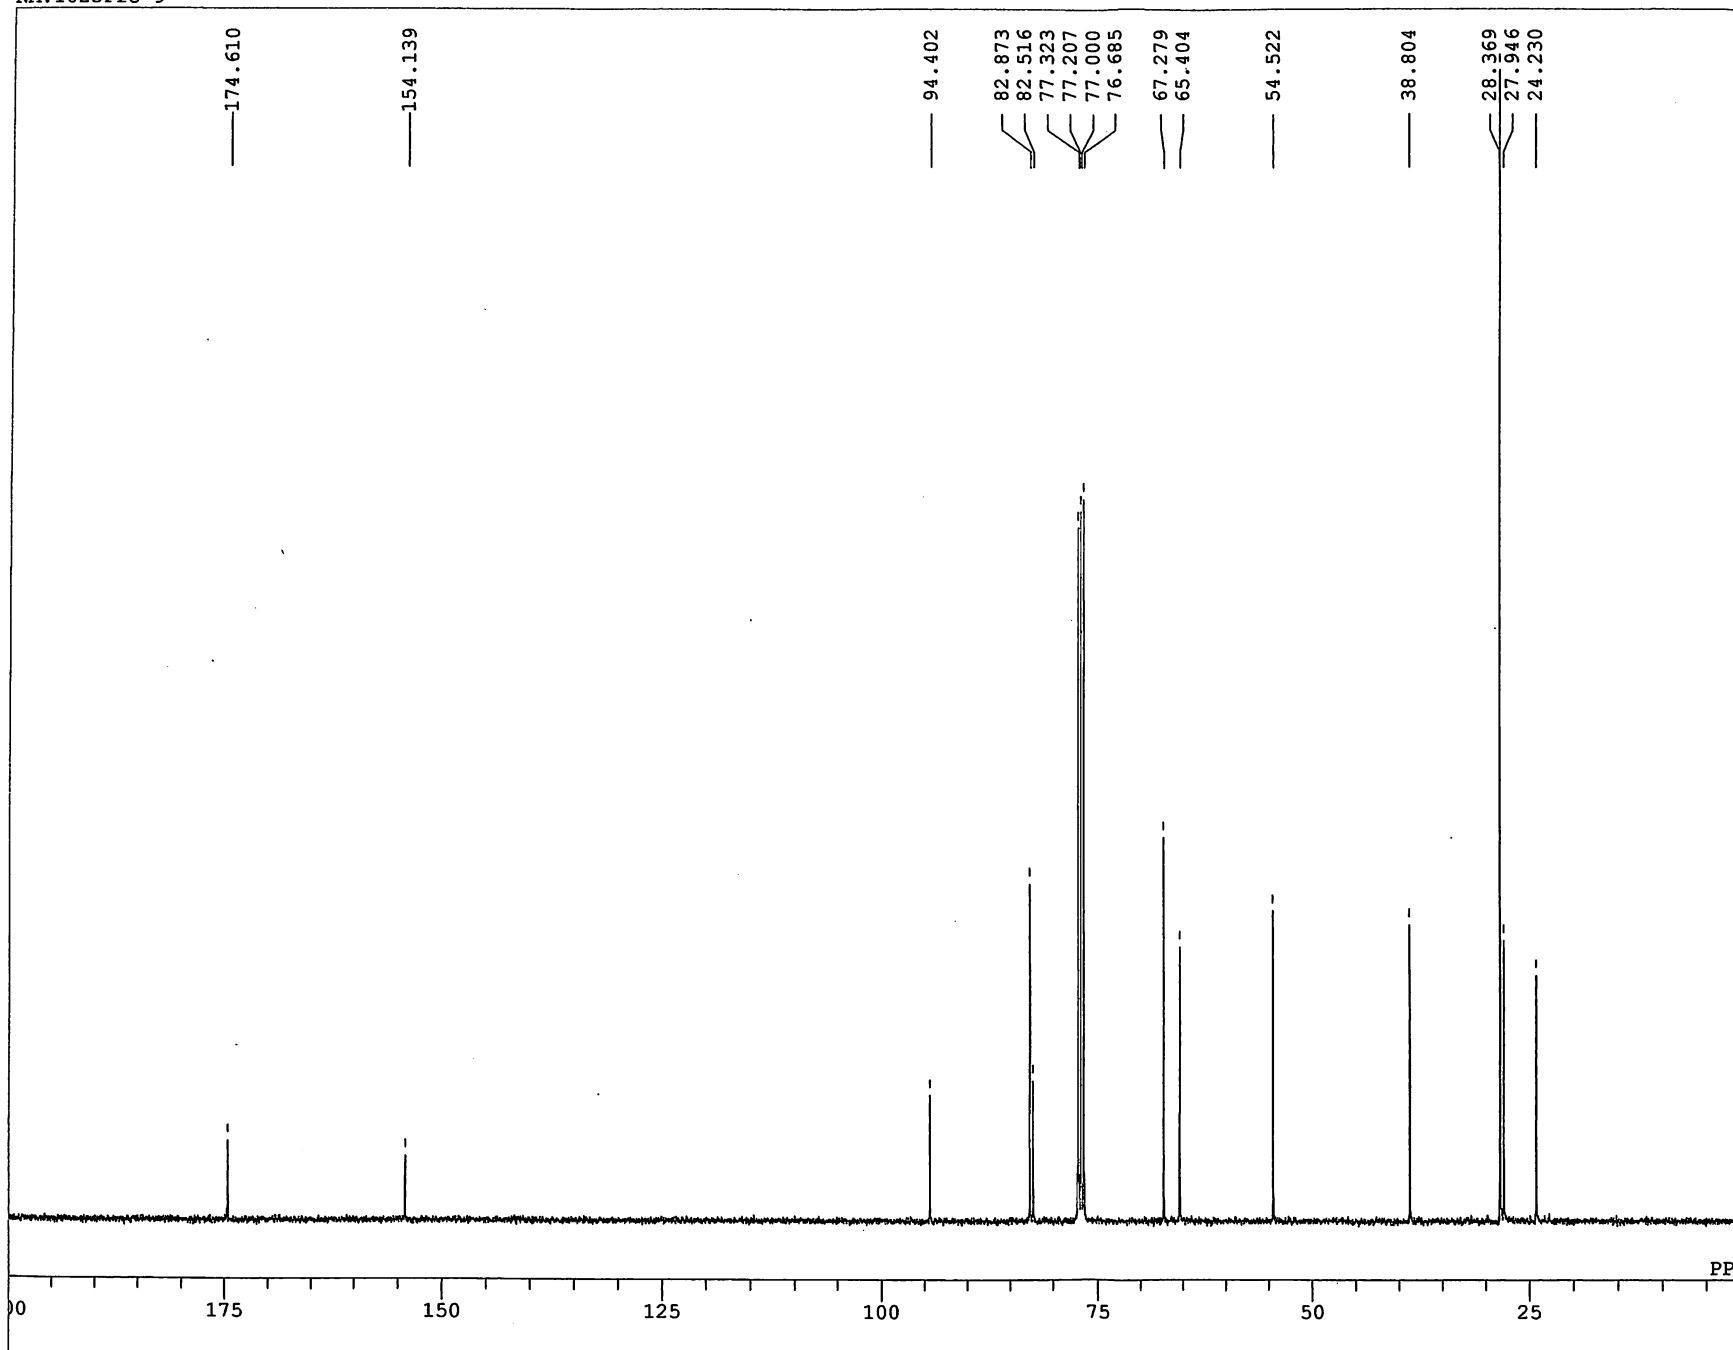

DFILE C:\WINNMR95\TEMPDATA\AUTO2BC  
COMNT NM.1023Fr5-9  
DATIM Sat Jan 22 00:06:16 2000  
OBNUC 13C  
EXMOD BCM  
OBFRQ 100.40 MHz  
OBSET 125.00 KHz  
OBFIN 10500.0 Hz  
POINT 32768  
FREQU 27322.4 Hz  
SCANS 4096  
ACQTM 1.199 sec  
PD 1.797 sec  
PW1 4.8 us  
IRNUC 1H  
CTEMP 30.2 c  
SLVNT CDCL3  
EXREF 77.00 ppm  
BF 1.20 Hz  
RGAIN 26

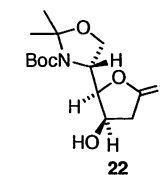

NM.780

5.357  
↓  
1.000  
↓  
1.070  
↓  
0.773  
↓  
0.377  
0.893  
↓ ↓  
1.808  
↓  
-0.063  
↓  
19.673  
↓  
0.301  
↓  
0.442  
↓

04-NOV-98 19: 41: 11  
DFILE Q1H  
OBNUC 1H  
EXMOD NON  
OFR 270.05 MHz  
OBSET 112.00 kHz  
OBFIN 5800.0 Hz  
POINT 32768  
FREQU 5405.4 Hz  
SCANS 16  
ACQTM 3.031 sec  
PD 3.969 sec  
PW1 5.5 us  
IRNUC 1H  
CTEMP 59.9 c  
SLVNT C6D6  
EXREF 0.00 ppm  
BF 0.16 Hz  
RGAIN 18  
OPERATOR : \_\_\_\_\_

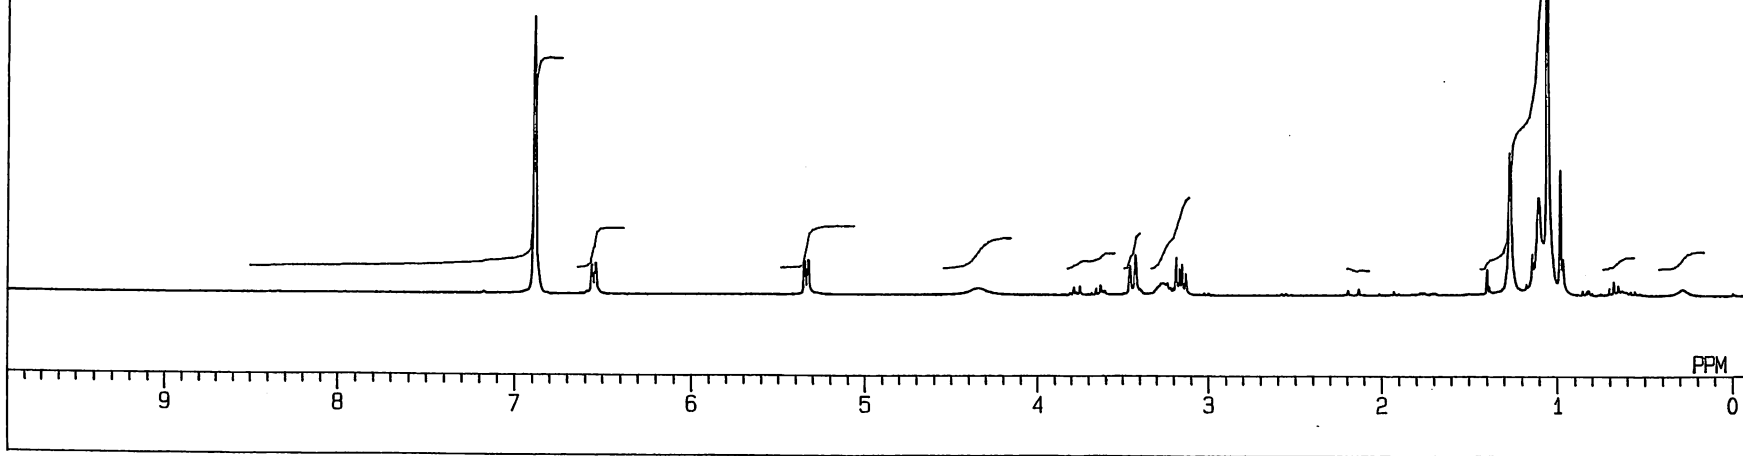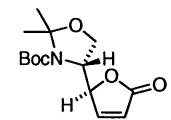

Key Comp

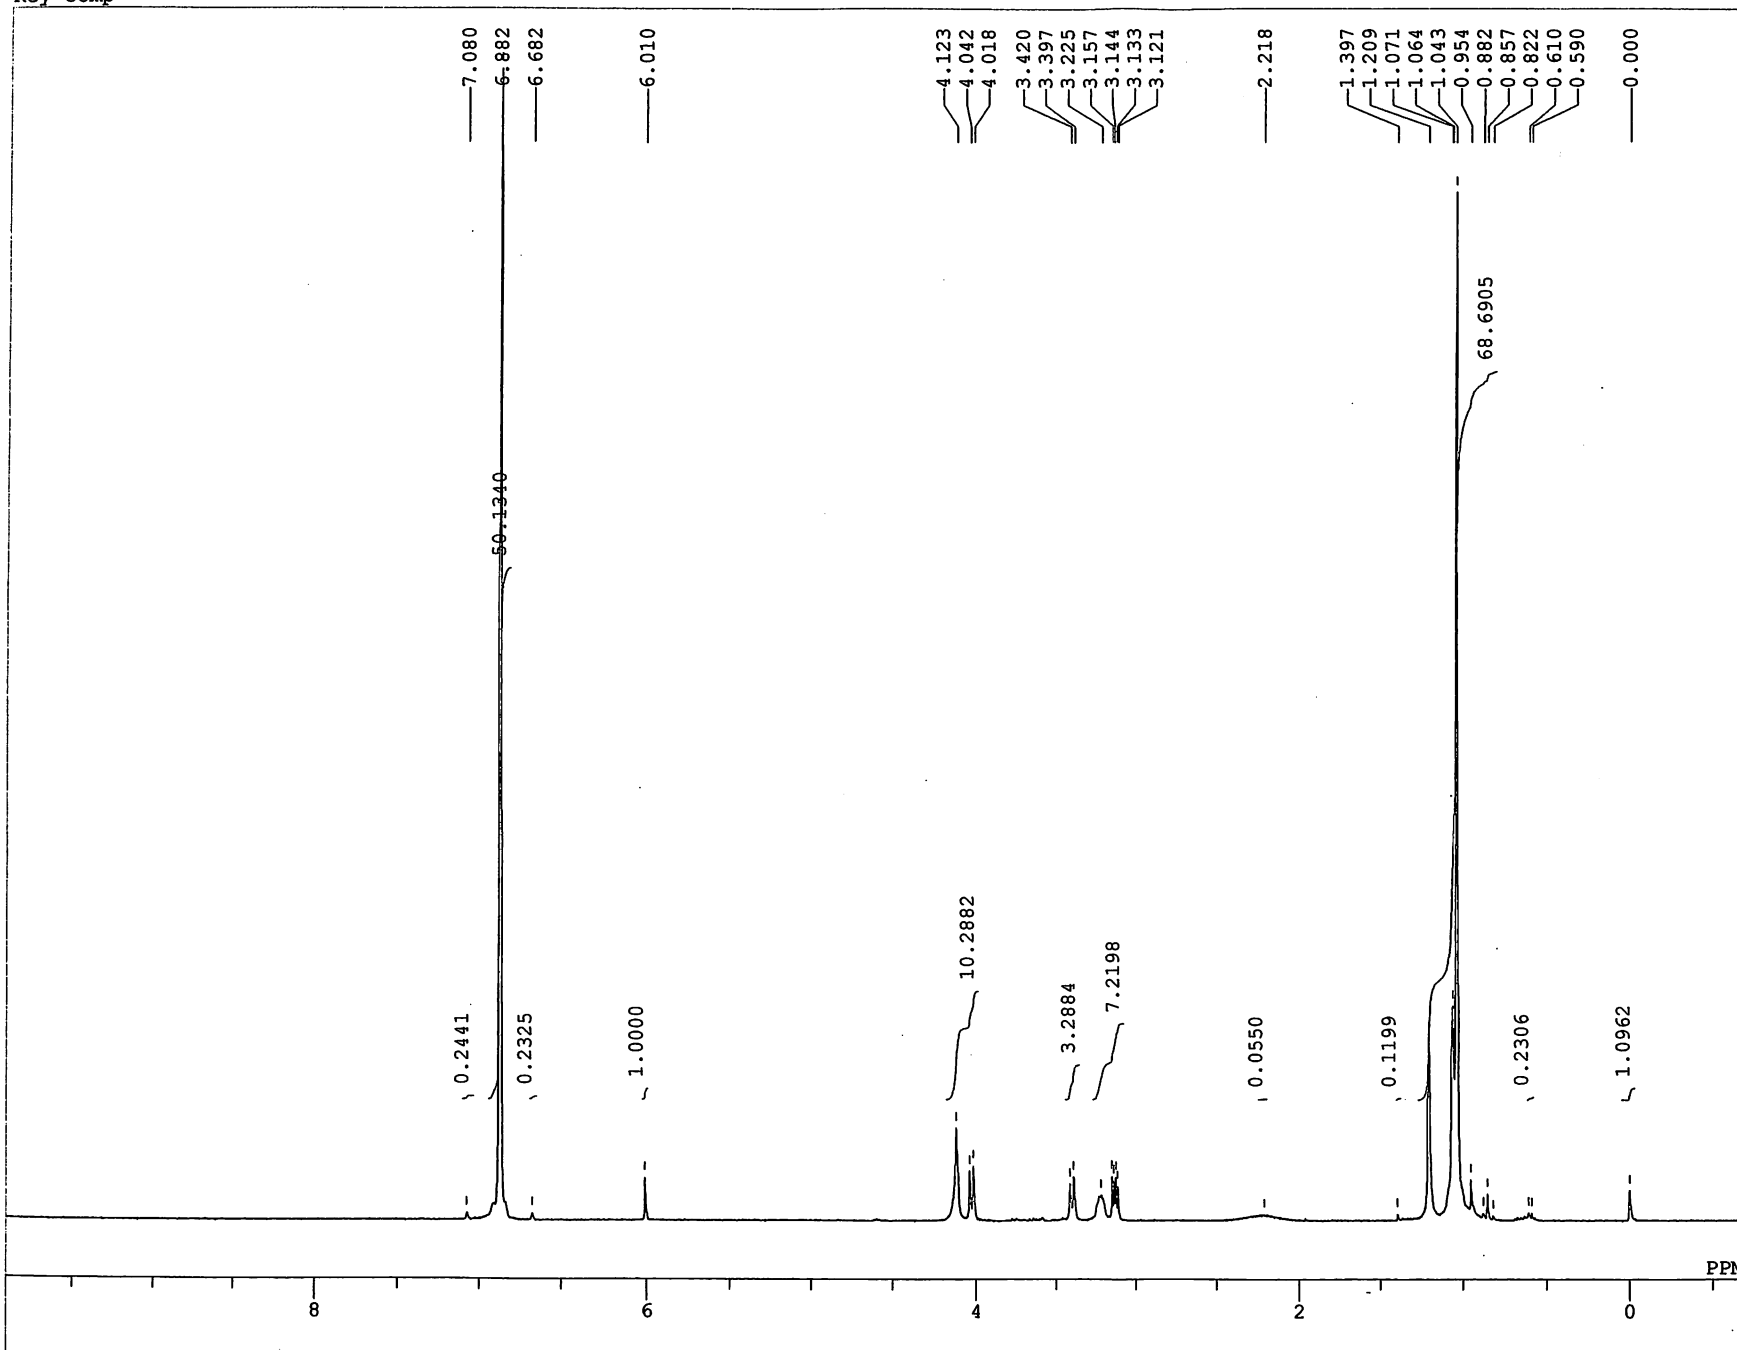

DFILE C:\WINNMR95\TEMPDATA\AUTO1NC  
COMNT Key Comp  
DATIM Fri Jan 28 17:29:29 2000  
OBNUC 1H  
EXMOD NON  
OBFRQ 399.65 MHz  
OBSET 124.00 KHz  
OBFIN 10500.0 Hz  
POINT 32768  
FREQU 8000.0 Hz  
SCANS 16  
ACQTM 4.096 sec  
PD 3.967 sec  
PW1 5.0 us  
IRNUC 1H  
CTEMP 60.2 c  
SLVNT C6D6  
EXREF 0.00 ppm  
BF 0.12 Hz  
RGAIN 20

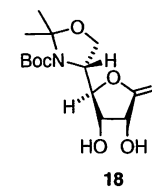

key Comp

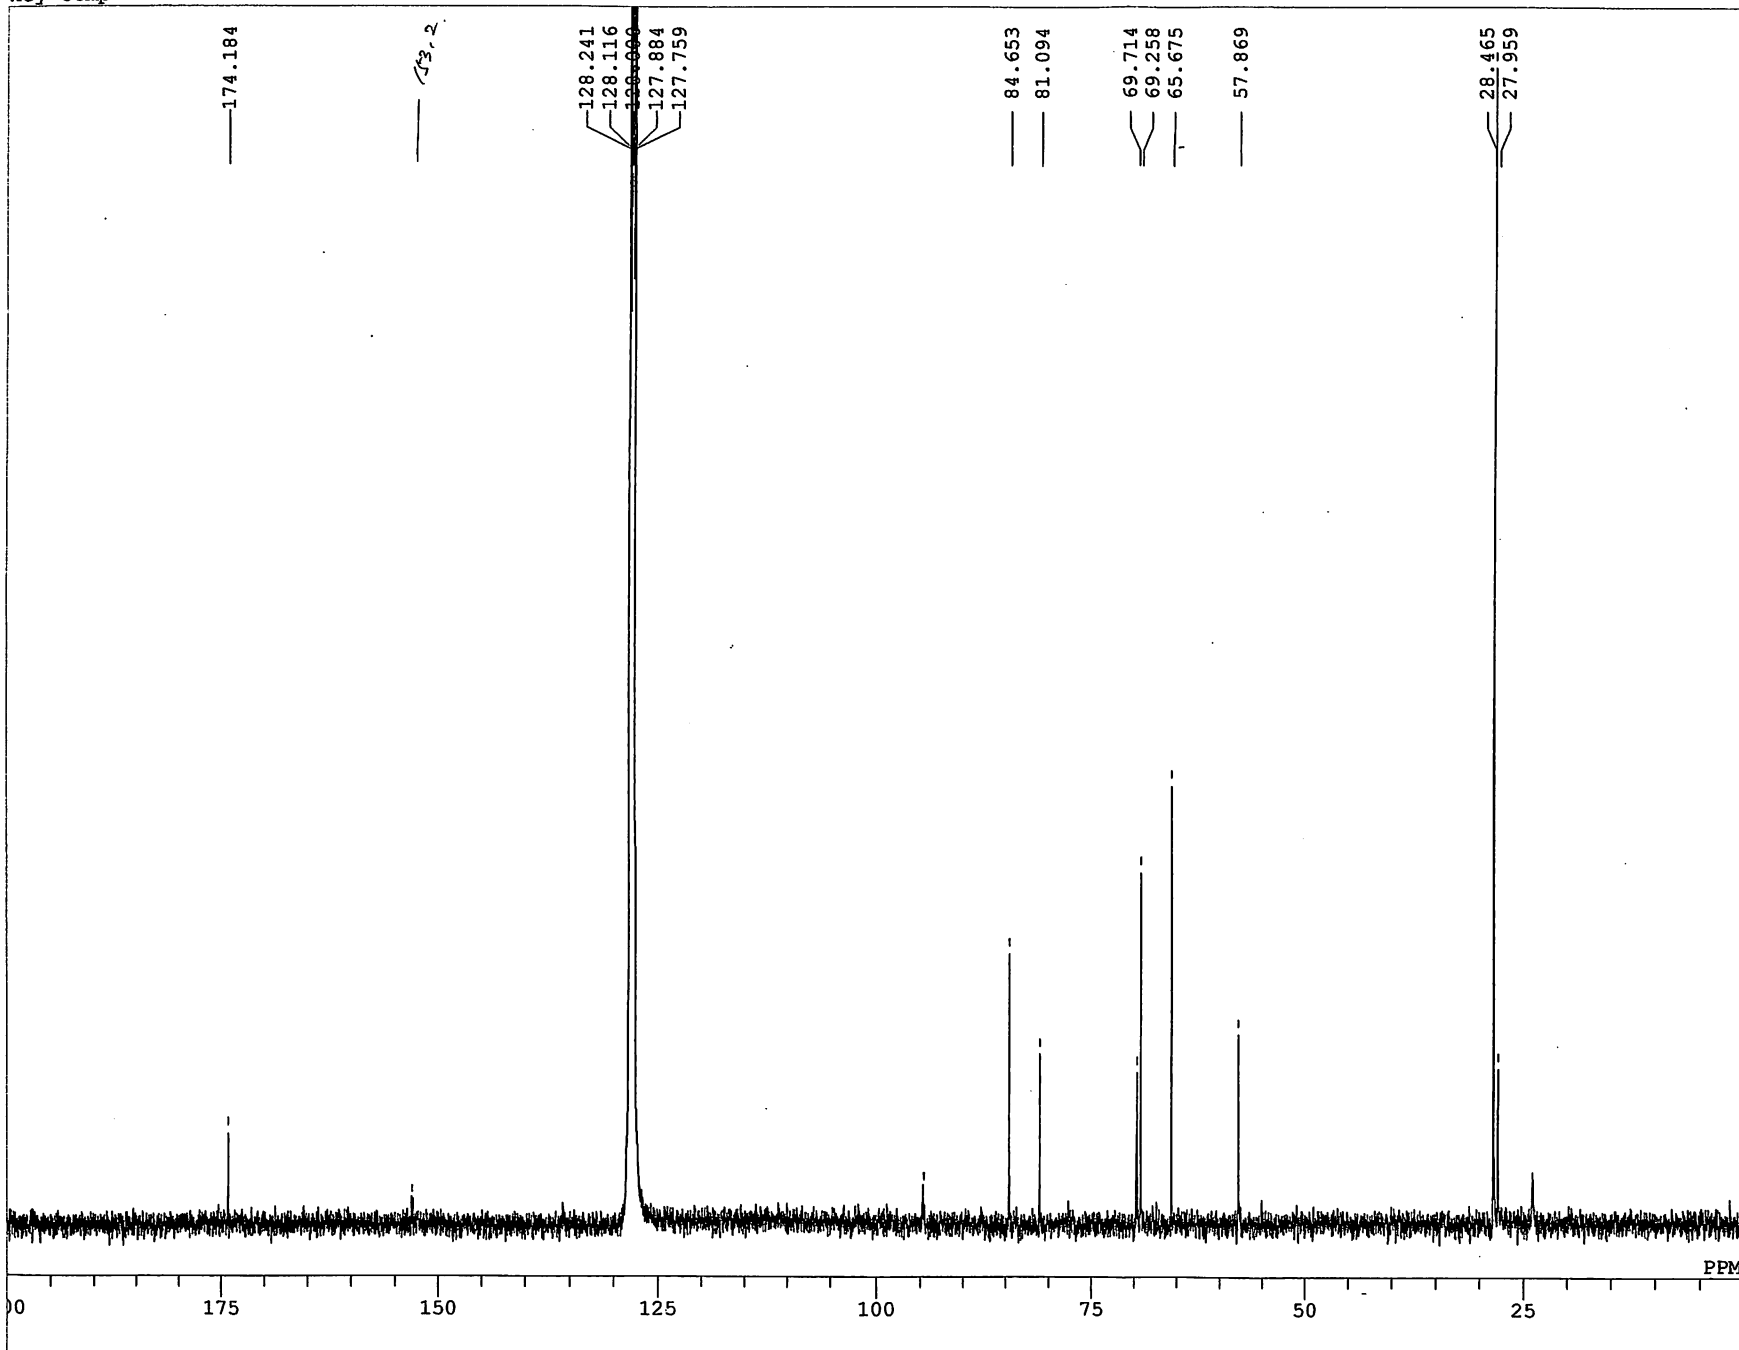

DFILE C:\WINNMR95\TEMPDATA\AUTO2BC  
COMNT key Comp  
DATIM Sat Jan 29 05:29:03 2000  
OBNUC 13C  
EXMOD BCM  
OBFREQ 100.40 MHz  
OBSET 125.00 KHz  
OBFIN 10500.0 Hz  
POINT 32768  
FREQU 27322.4 Hz  
SCANS 12000  
ACQTM 1.199 sec  
PD 1.797 sec  
PW1 4.8 us  
IRNUC 1H  
CTEMP 60.3 c  
SLVNT C6D6  
EXREF 128.00 ppm  
BF 1.20 Hz  
RGAIN 22

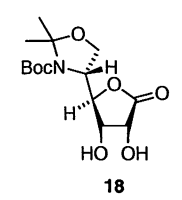

EXP11-5

4.108      6.574  
↓          ↓  
  
1.050      1.021      1.000      0.288      3.166      1.005      1.996      0.430      0.755  
↓          ↓          ↓          ↓          ↓          ↓          ↓          ↓          ↓  
  
16.465      0.616  
↓          ↓

28-APR-03 21: 16: 54  
DFILE Q1H  
OBNUC 1H  
EXMOD NON  
OFR            270.05 MHz  
OBSET          112.00 kHz  
OBFIN          5800.0 Hz  
POINT          32768  
FREQU          5405.4 Hz  
SCANS          16  
ACQTM          3.031 sec  
PD             3.969 sec  
PW1            5.1 us  
IRNUC 1H  
CTEMP          22.1 c  
SLVNT CDCL3  
EXREF          0.00 ppm  
BF             0.17 Hz  
RGAIN          16  
OPERATOR : \_\_\_\_\_

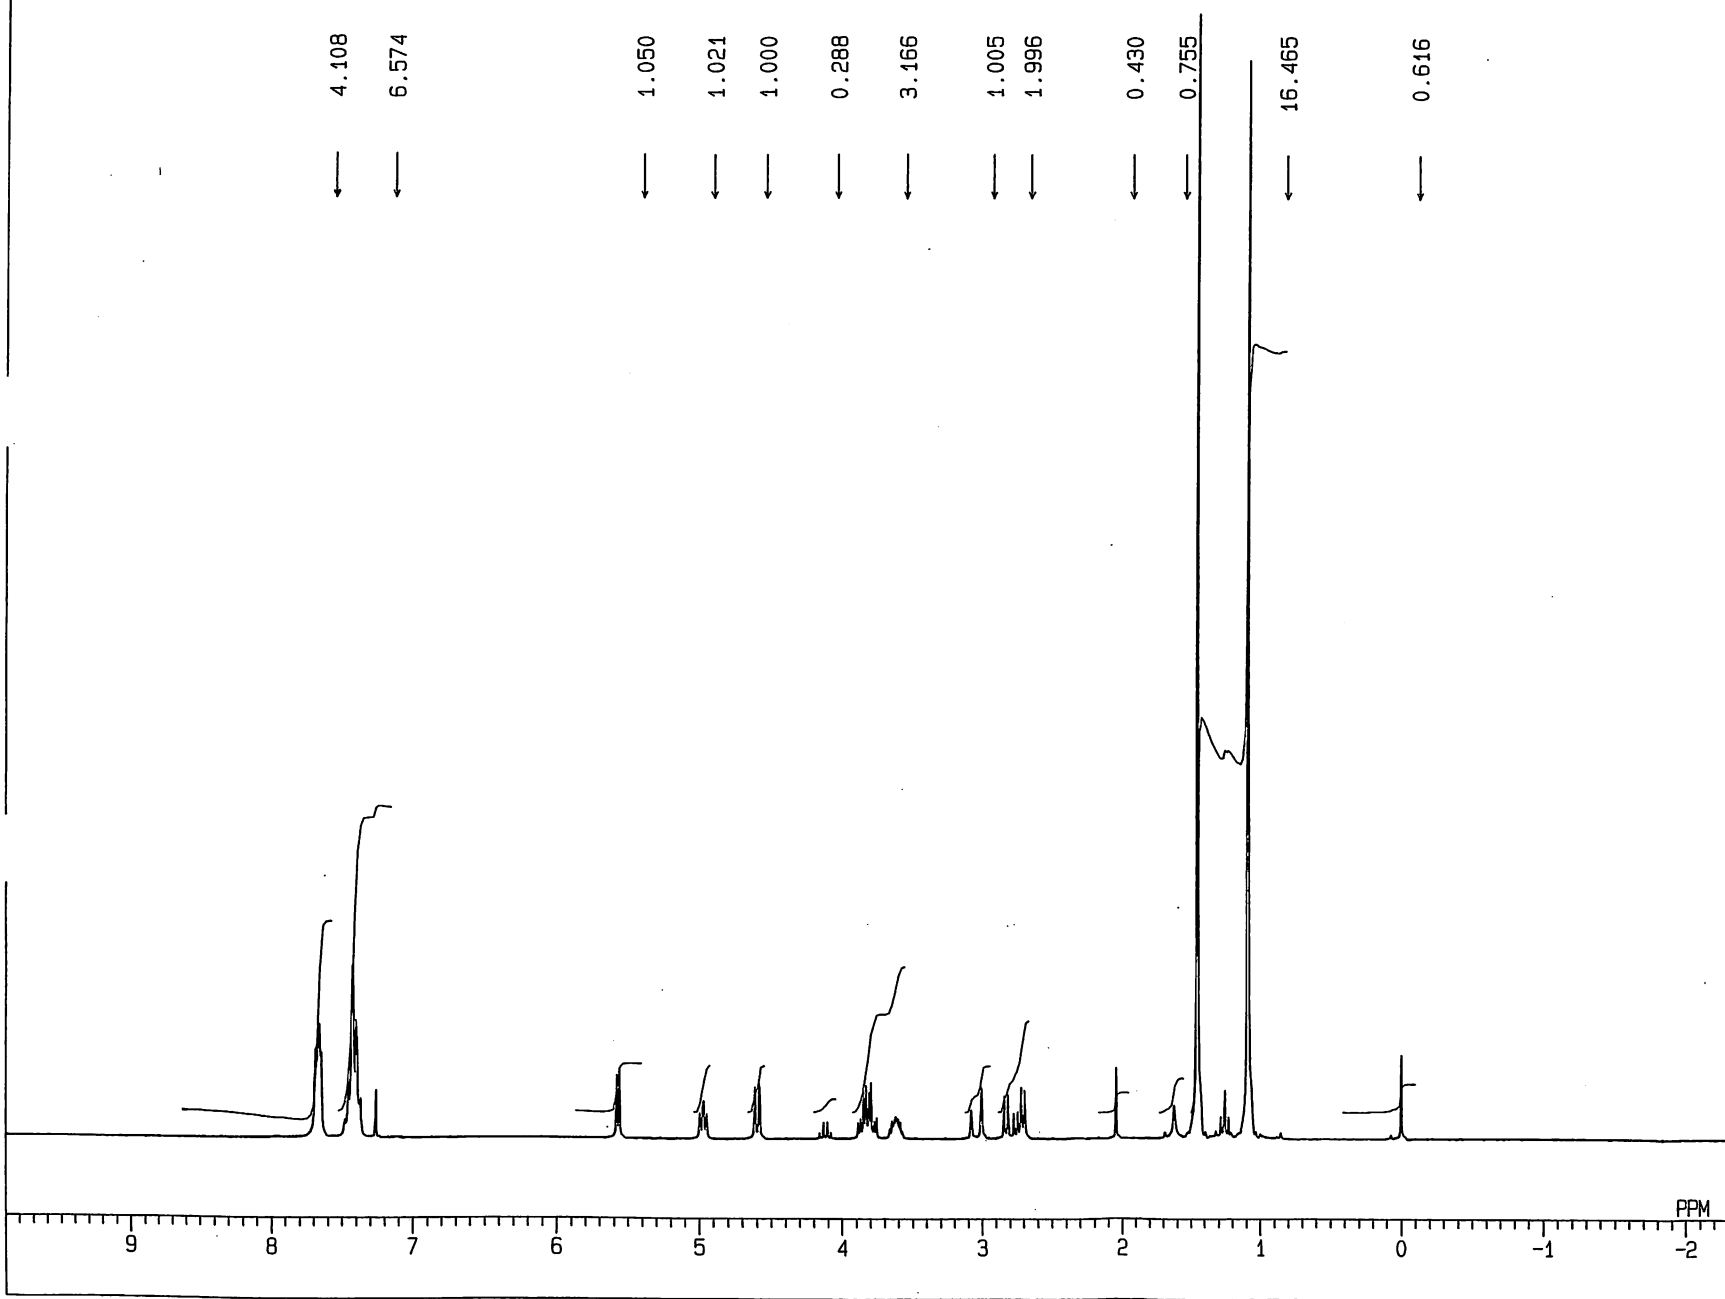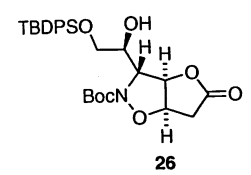

EXP11-5

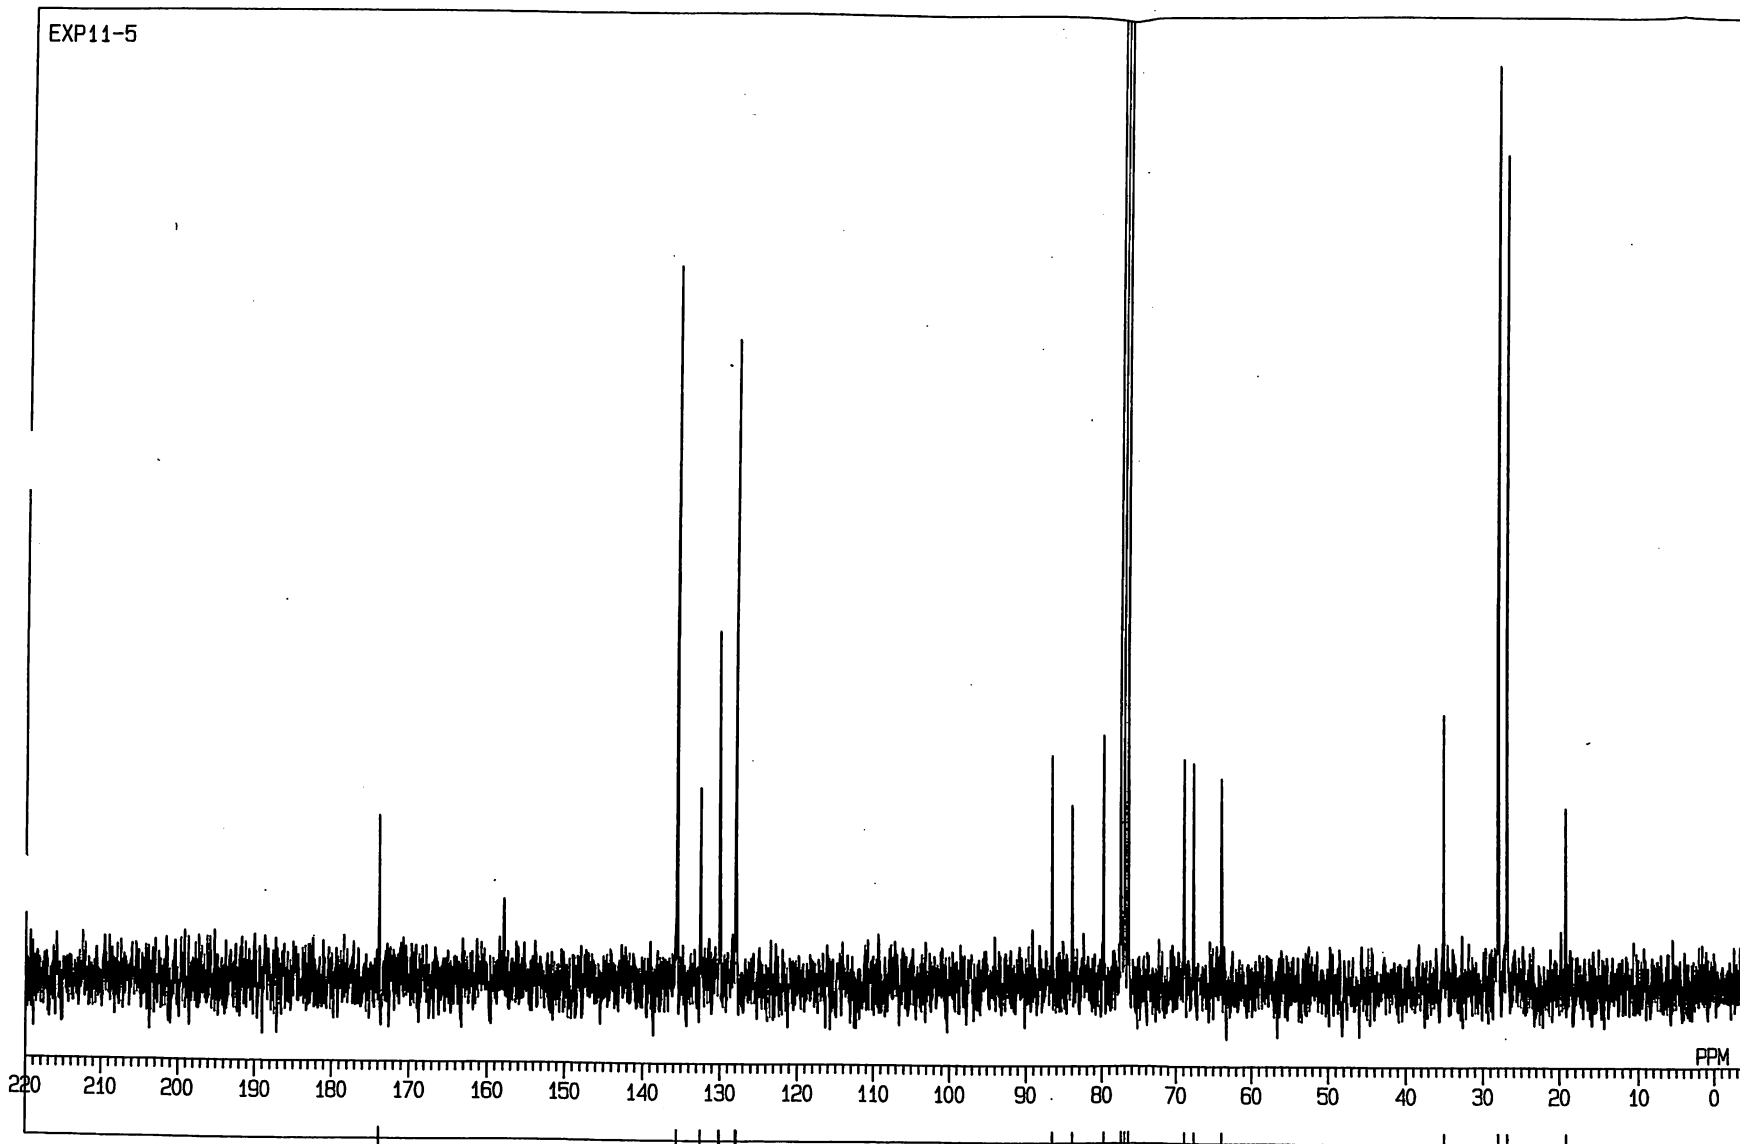

28-APR-03 23: 18: 44  
DFILE Q13C  
OBNUC 13C  
EXMOD BCM  
OFR 67.80 MHz  
OBSET 135.00 kHz  
OBFIN 5200.0 Hz  
POINT 32768  
FREQU 20000.0 Hz  
SCANS 159  
ACQTM 0.819 sec  
PD 2.181 sec  
PW1 3.8 us  
IRNUC 1H  
CTEMP 23.0 c  
SLVNT CDCL3  
EXREF 77.00 ppm  
BF 1.50 Hz  
RGAIN 27  
OPERATOR : \_\_\_\_\_

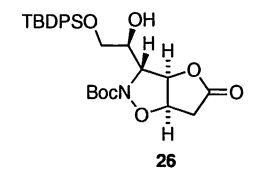

173.854

135.524  
133.785  
130.900  
127.863

86.524  
83.900  
79.785  
77.000  
76.833  
68.932  
67.866  
63.936

35.024  
27.962  
26.866  
19.247  
PPM



157

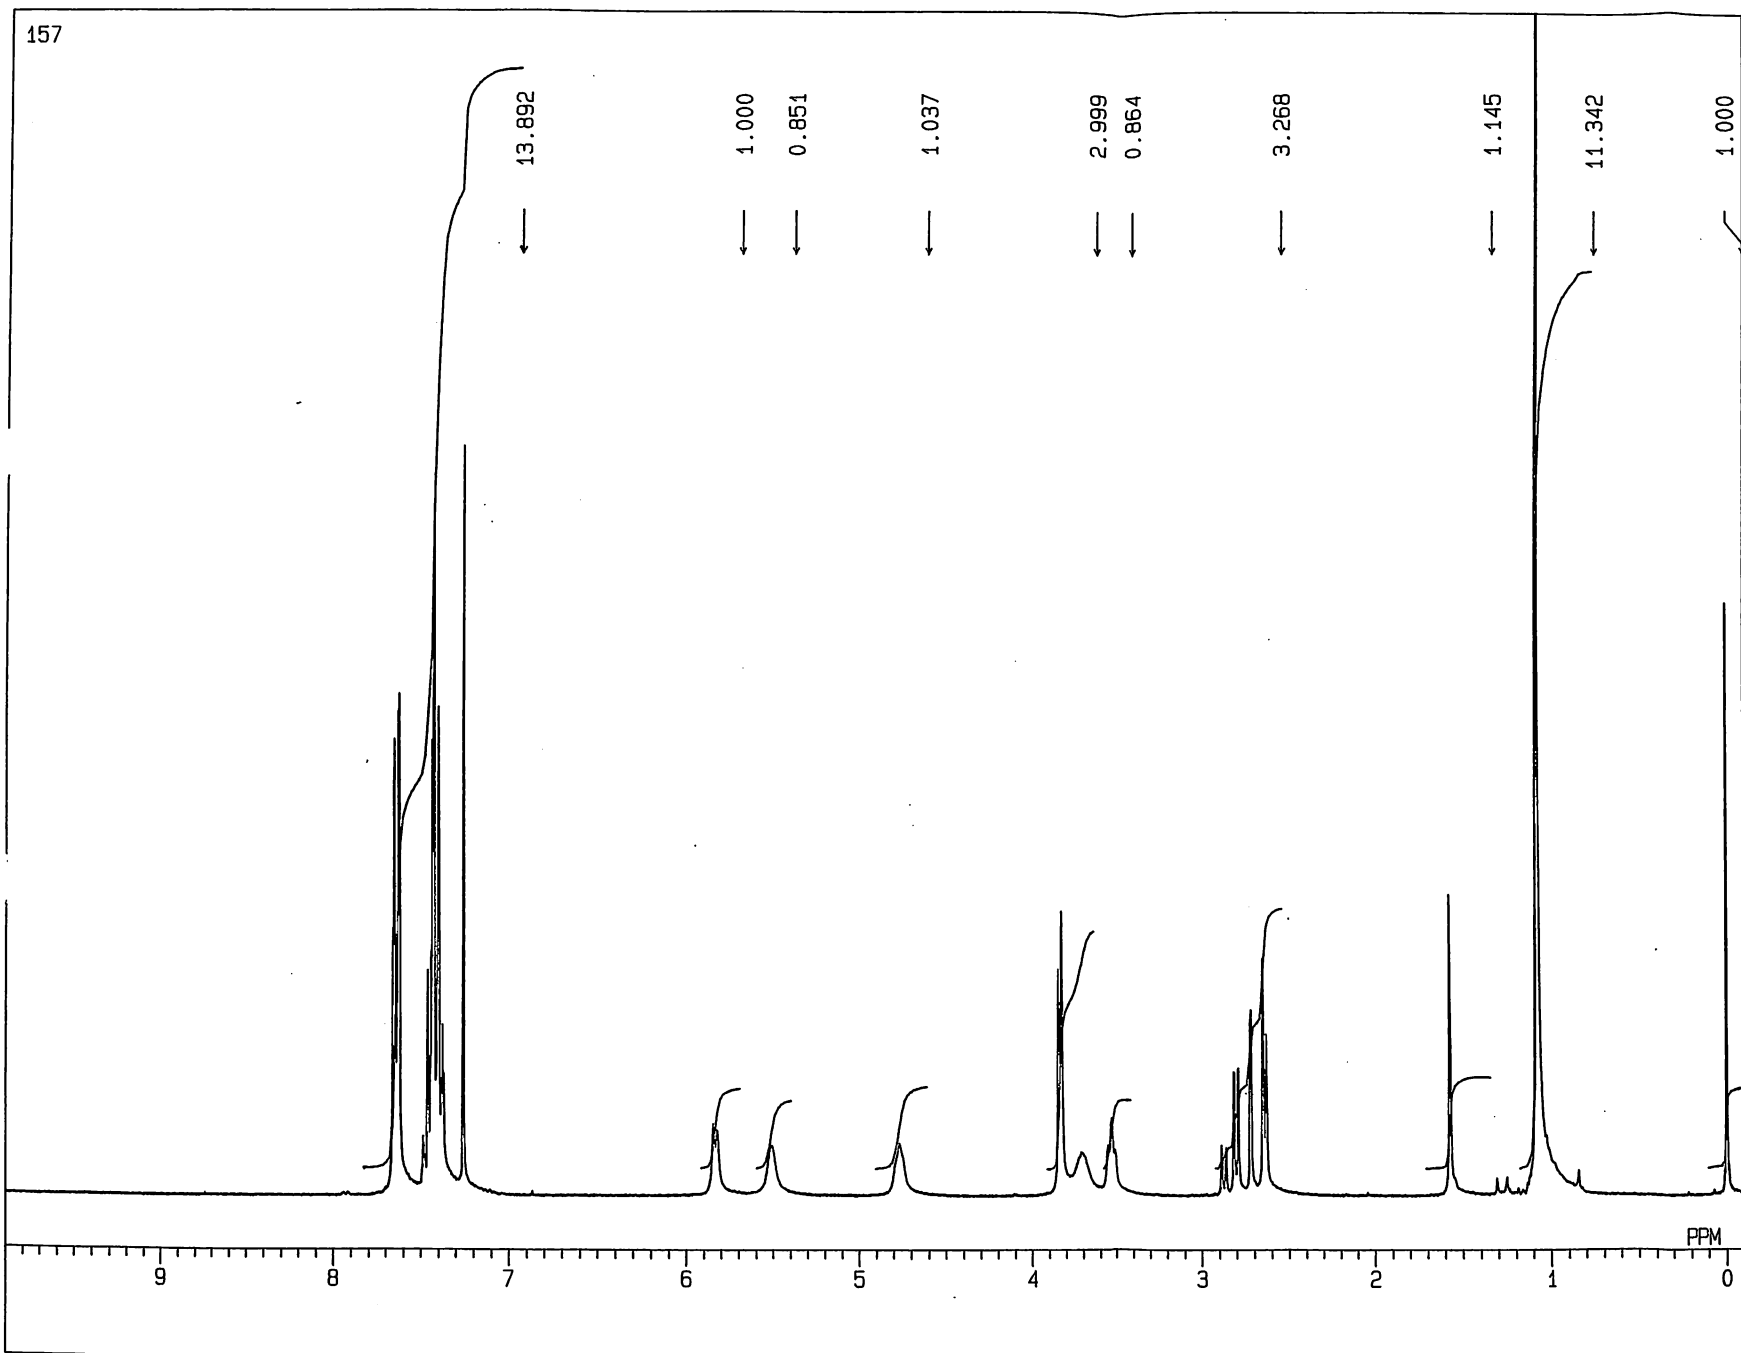

22-JAN-05 01:13:56  
DFILE QCOSY  
OBNUC 1H  
EXMOD NON  
OFR 270.05 MHz  
OBSET 112.00 kHz  
OBFIN 5800.0 Hz  
POINT 32768  
FREQU 5405.4 Hz  
SCANS 64  
ACQTM 3.031 sec  
PD 3.969 sec  
PW1 5.8 us  
IRNUC 1H  
CTEMP 20.3 c  
SLVNT CDCL3  
EXREF 0.00 ppm  
BF 0.16 Hz  
RGAIN 20  
OPERATOR : \_\_\_\_\_

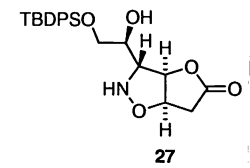

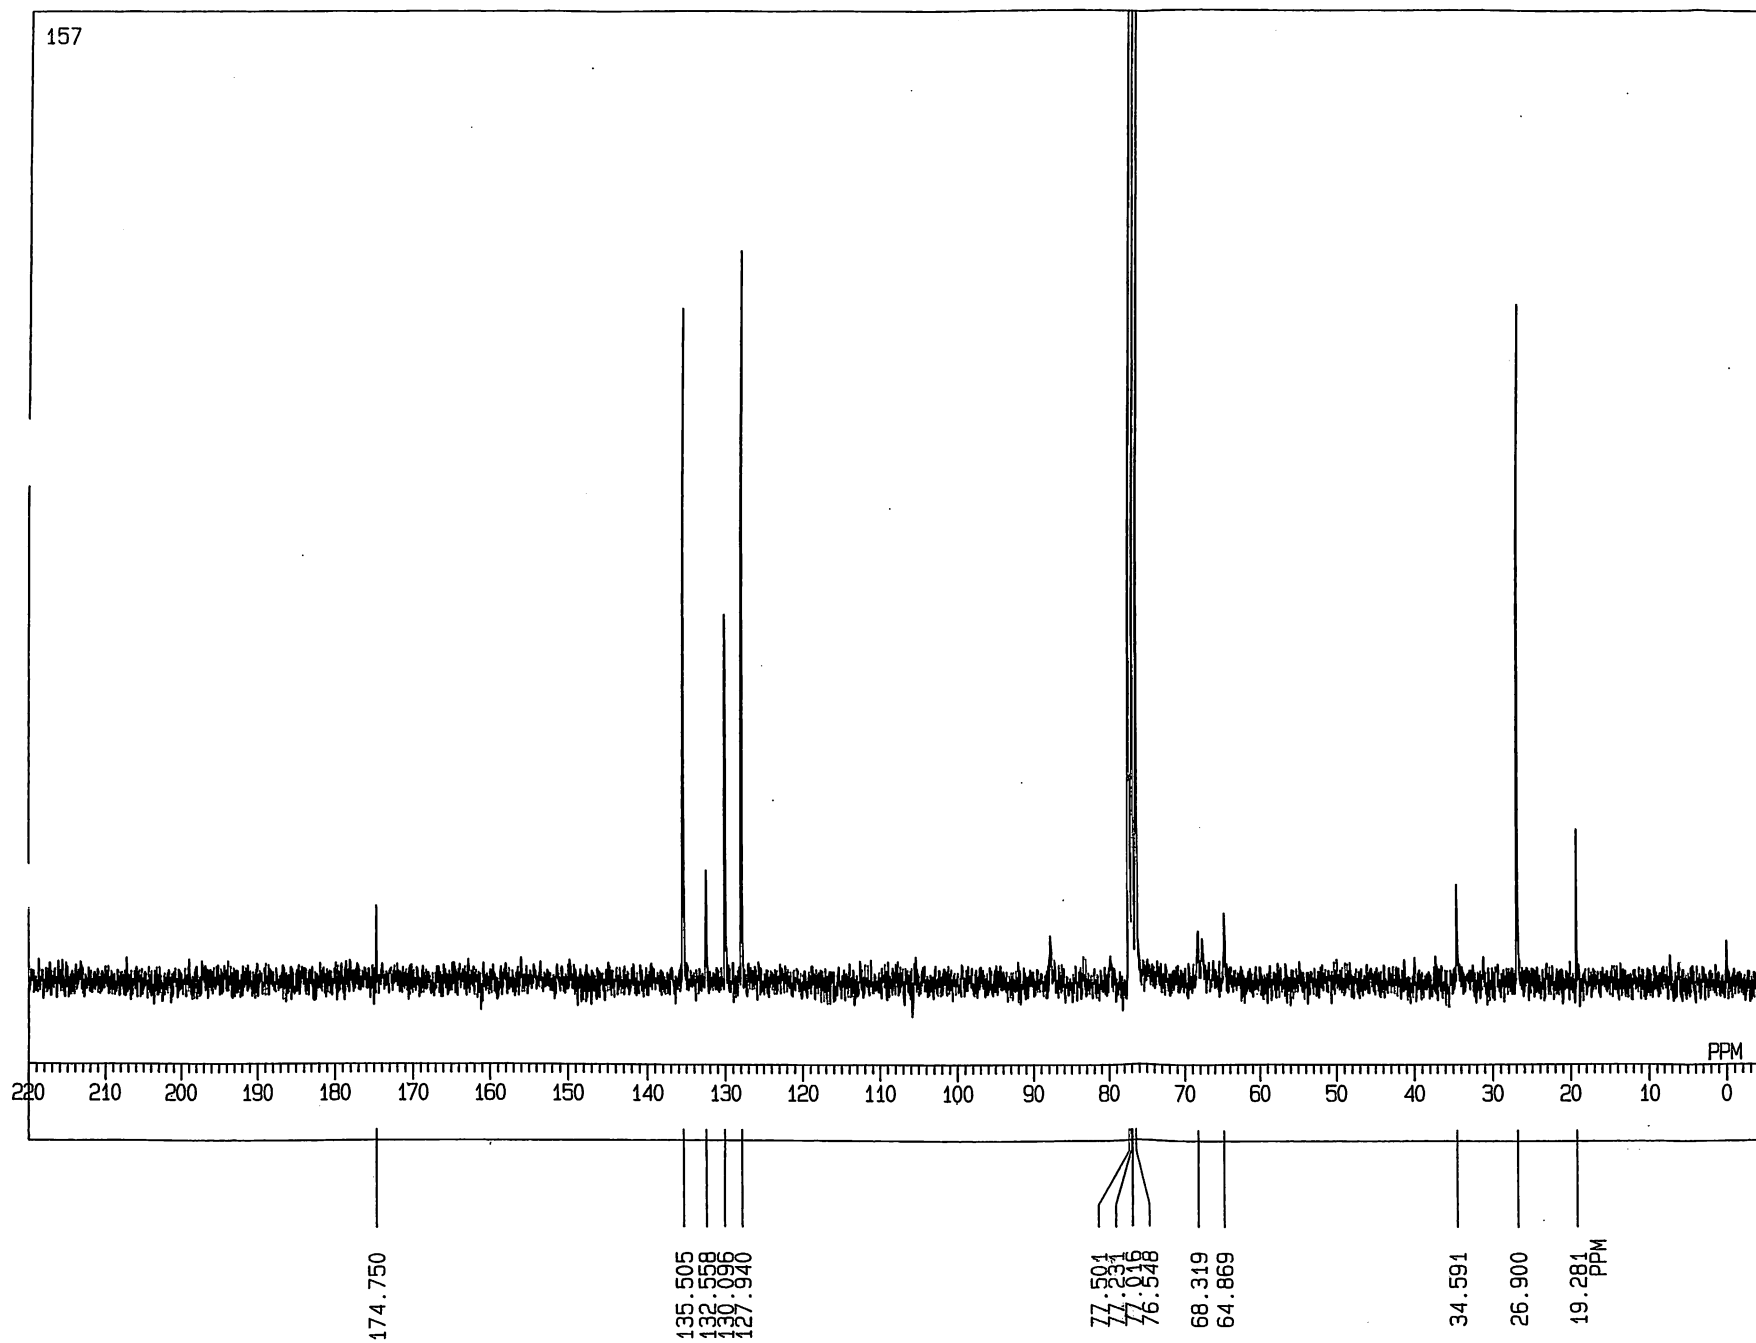

22-JAN-05 03:24:47  
DFILE Q13C  
OBNUC 13C  
EXMOD BCM  
OFR 67.80 MHz  
OBSET 135.00 kHz  
OBFIN 5200.0 Hz  
POINT 32768  
FREQU 20000.0 Hz  
SCANS 1980  
ACQTM 0.819 sec  
PD 2.181 sec  
PW1 4.2 us  
IRNUC 1H  
CTEMP 21.5 c  
SLVNT CDCL3  
EXREF 0.00 ppm  
BF 1.50 Hz  
RGAIN 27  
OPERATOR : \_\_\_\_\_

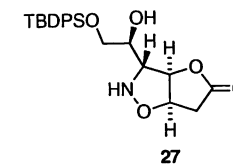

-Exp106

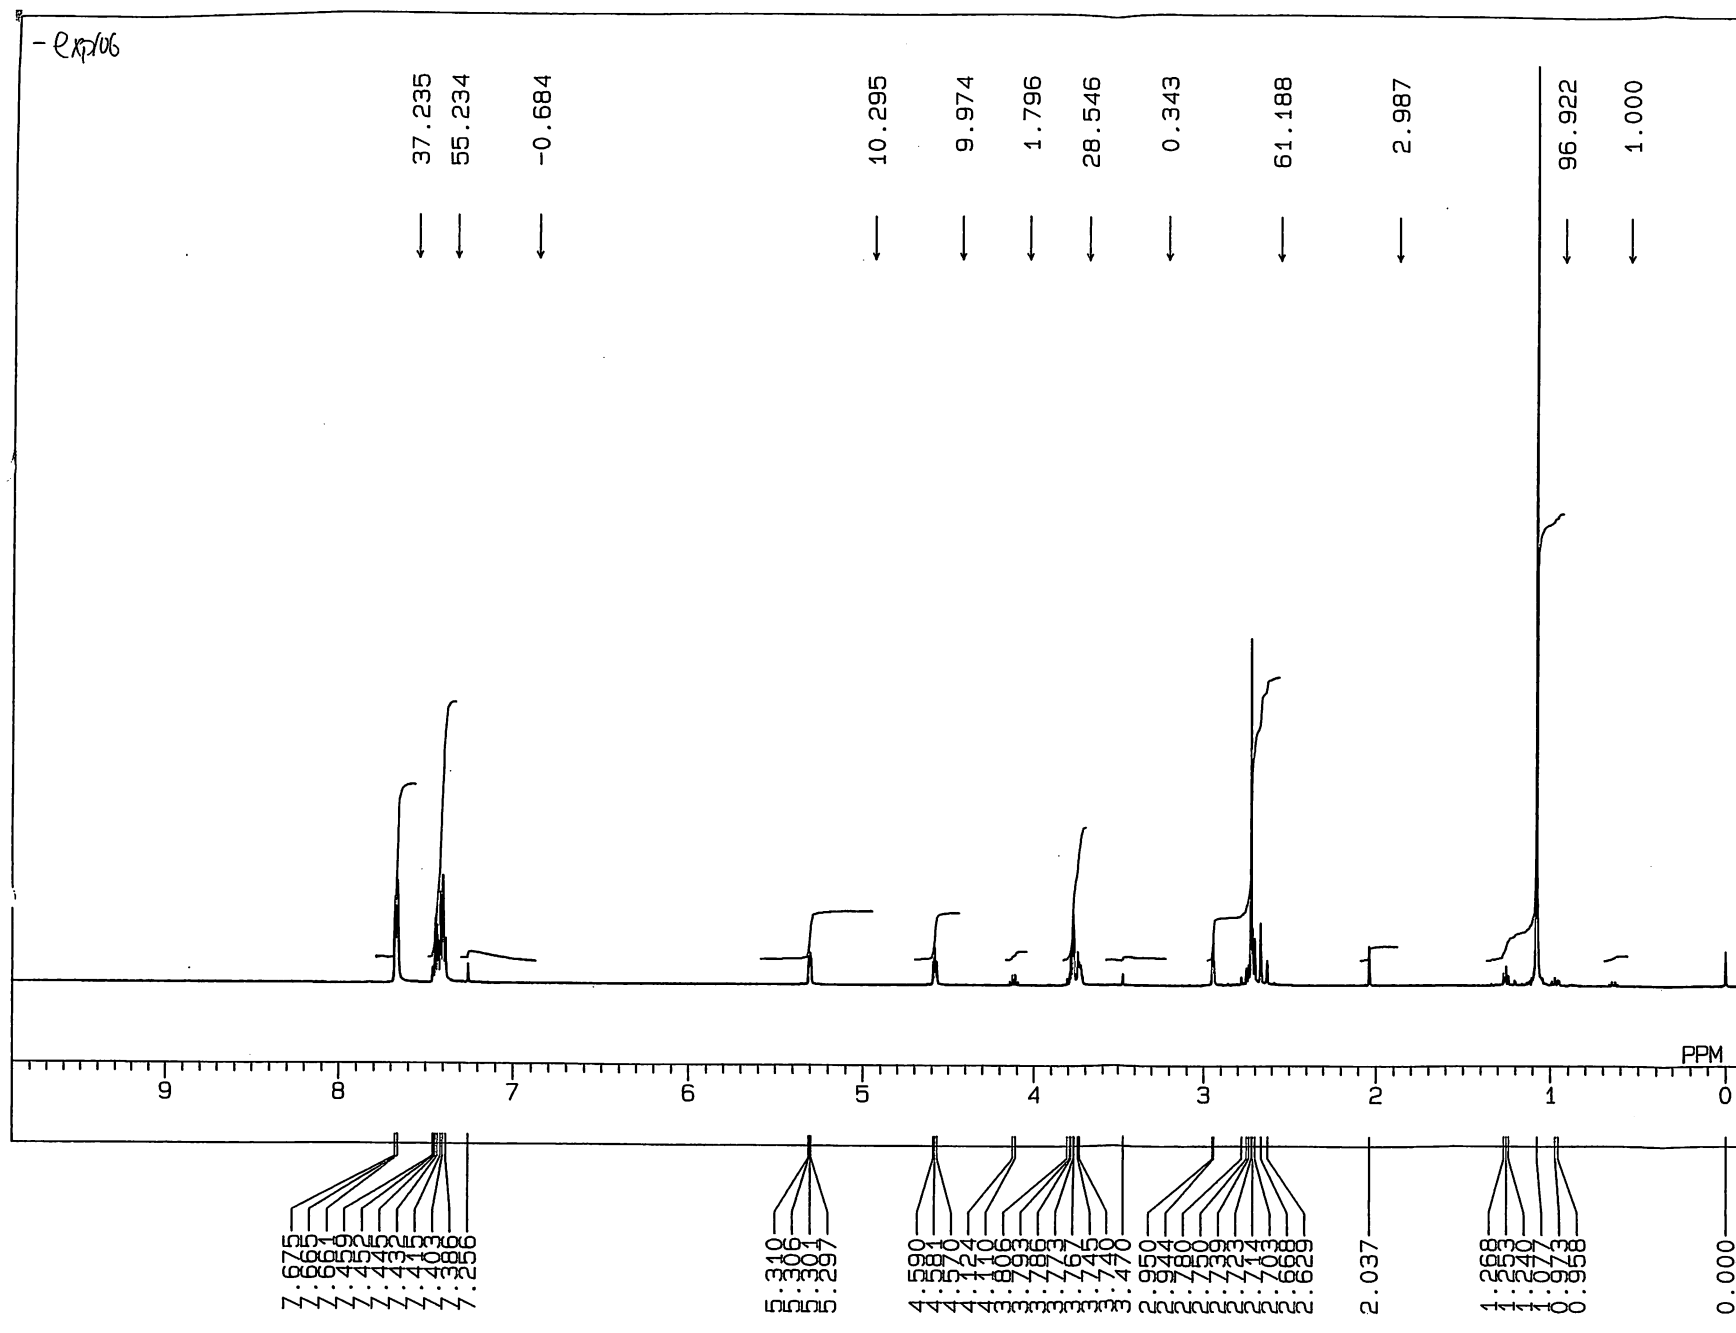

# JEOL

05-OCT-03 16: 41: 48  
 DFILE Q1H  
 COMNT -  
 EXMOD SGNON  
 OBNUC 1H  
 OBFIN 9852.7 Hz  
 POINT 32768  
 FREQU 15015.0 Hz  
 SCANS 16  
 ACQTM 1.091 sec  
 PD 3.909 sec  
 PW1 7.0 us  
 IRFIN 10157.0 Hz  
 IRATN 15  
 IRRPW 60 us  
 TEMP. 22.0 c  
 SLVNT CDCL3  
 EXREF 0.00 ppm  
 BF 0.46 Hz  
 RGAIN 14  
 XE 5001.5990 Hz  
 XS -518.9199 Hz

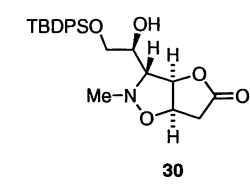

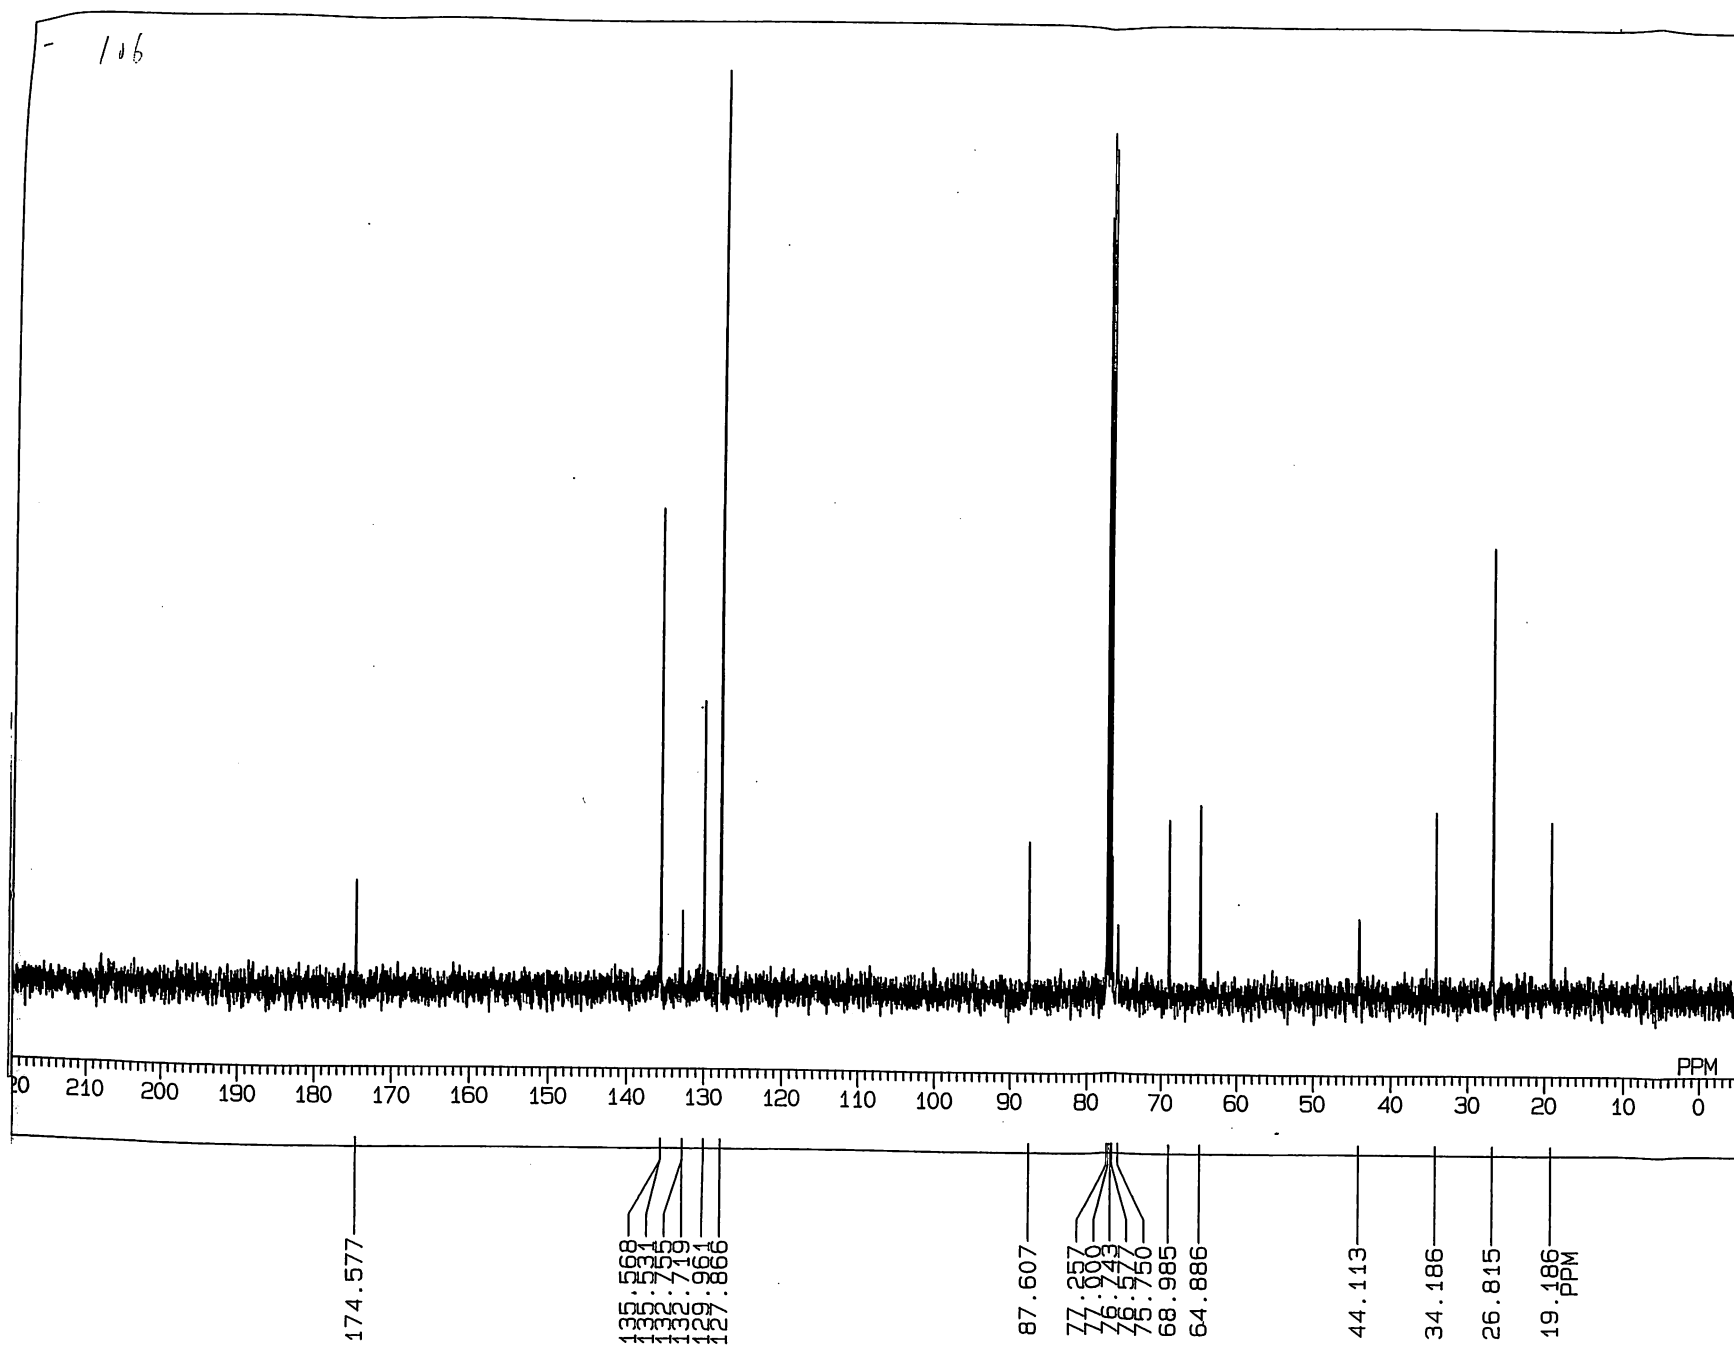

# JEOL

05-OCT-03 18:15:36  
DFILE Q13C  
COMNT -  
EXMOD SGBCM  
OBNUC 13C  
OBFIN 10404.0 Hz  
POINT 32768  
FREQU 37878.8 Hz  
SCANS 158  
ACQTM 0.433 sec  
PD 1.567 sec  
PW1 6.0 us  
IRFIN 10157.0 Hz  
IRATN 33  
IRRPW 50 us  
TEMP. 22.0 c  
SLVNT CDCL3  
EXREF 77.00 ppm  
BF 1.50 Hz  
RGAIN 29  
XE 28297.2000 Hz  
XS -3428.9400 Hz

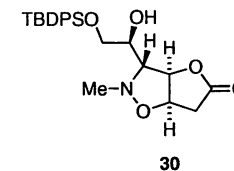

EXP159

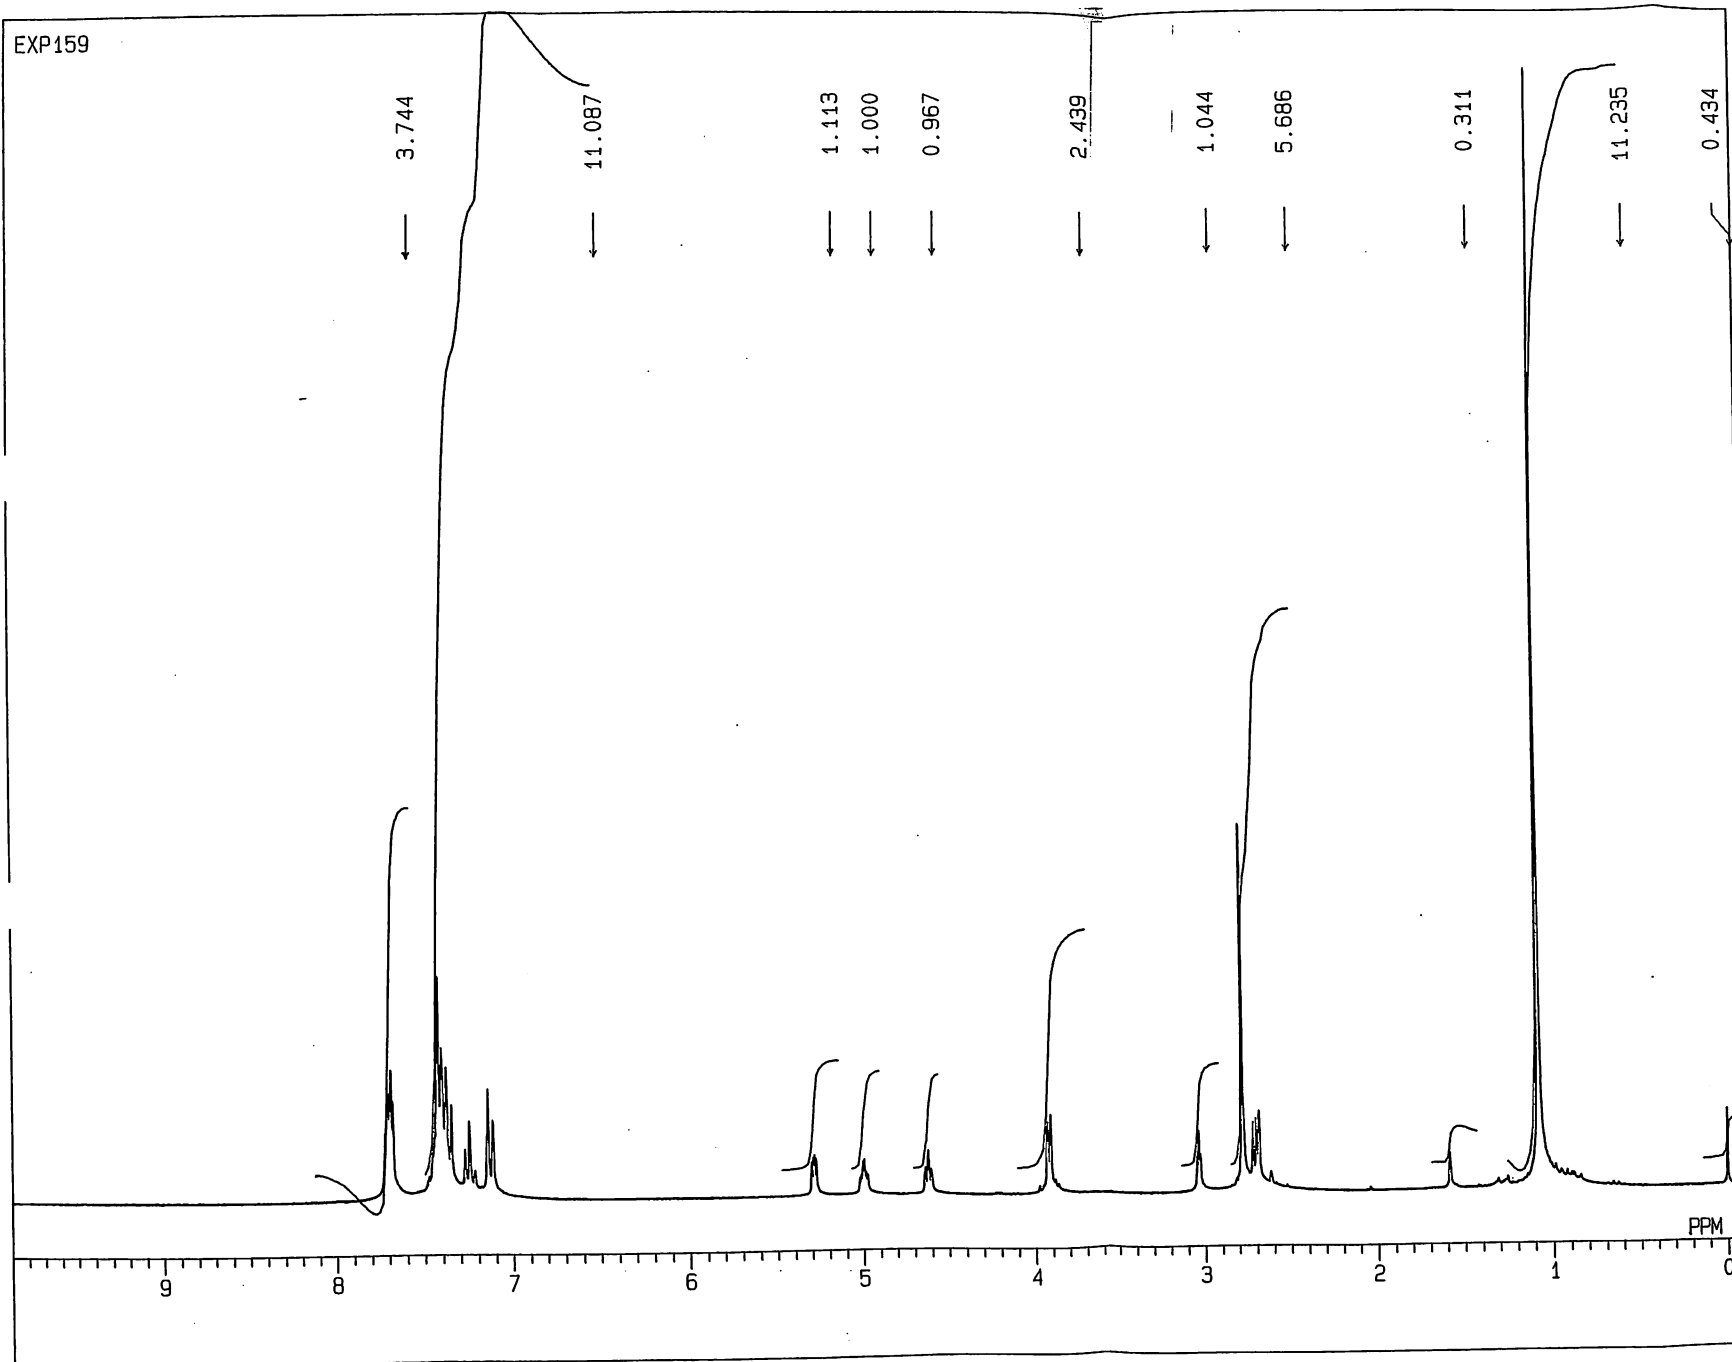

21-JAN-05 22: 23: 06  
DFILE QCOSY  
OBNUC 1H  
EXMOD NON  
OFR 270.05 MHz  
OBSET 112.00 kHz  
OBFIN 5800.0 Hz  
POINT 32768  
FREQU 5405.4 Hz  
SCANS 32  
ACQTM 3.031 sec  
PD 3.969 sec  
PW1 5.8 us  
IRNUC 1H  
CTEMP 21.0 c  
SLVNT CDCL3  
EXREF 0.00 ppm  
BF 0.16 Hz  
RGAIN 17  
OPERATOR : \_\_\_\_\_

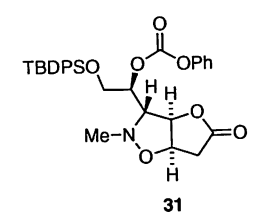

exp 130

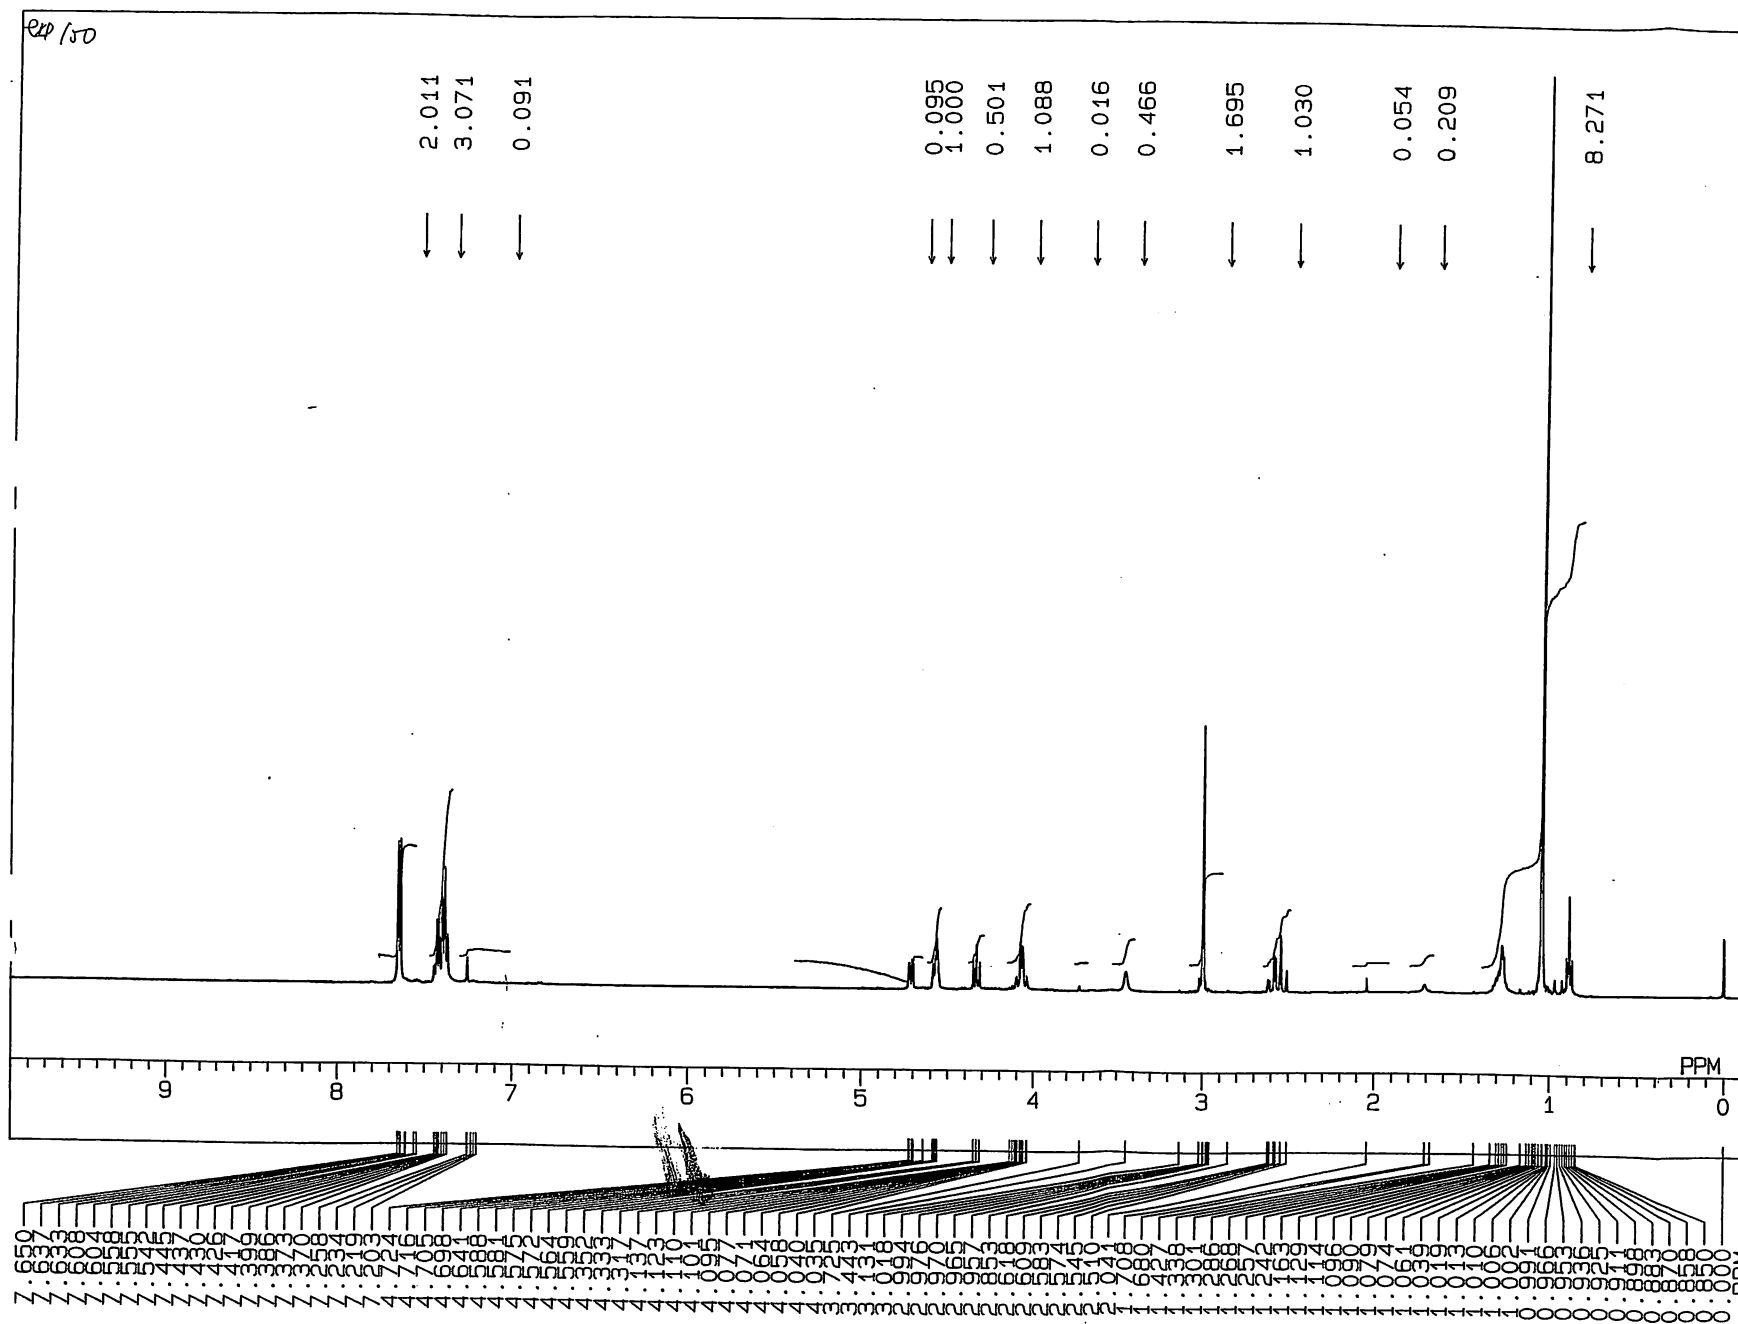

# JEOL

10-JAN-04 00:13:18  
DFILE Q1H  
COMNT -  
EXMOD SGNON  
OBNUC 1H  
OBFIN 9870.6 Hz  
POINT 32768  
FREQU 15015.0 Hz  
SCANS 16  
ACQTM 1.091 sec  
PD 3.909 sec  
PW1 7.0 us  
IRFIN 10157.0 Hz  
IRATN 15  
IRRPW 60 us  
TEMP. 22.0 c  
SLVNT CDCL3  
EXREF 0.00 ppm  
BF 0.46 Hz  
RGAIN 14  
XE 5001.5990 Hz  
XS -498.7588 Hz

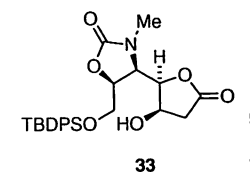

# JEOL

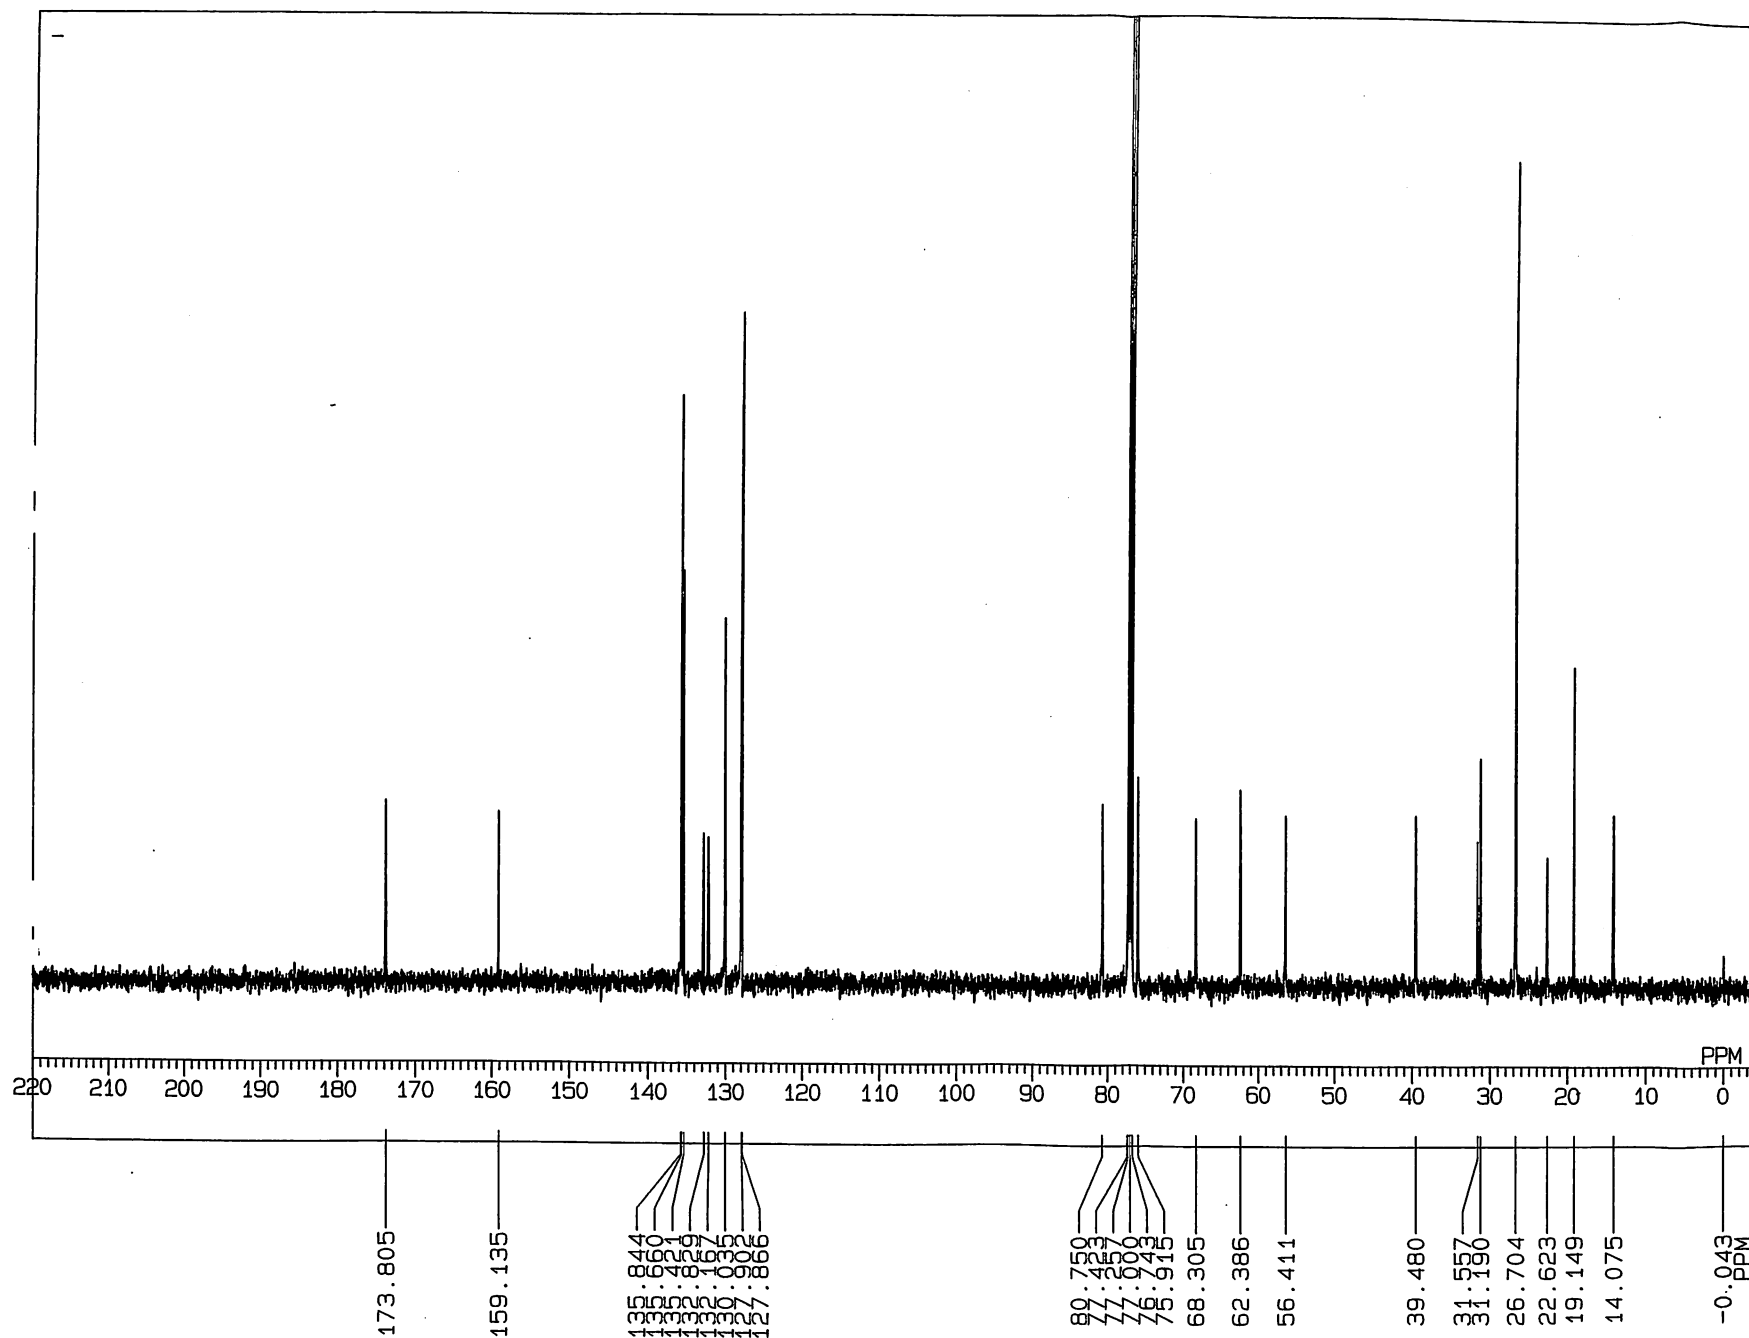

10-JAN-04 03: 03: 09  
DFILE Q13C  
COMNT -  
EXMOD S6BCM  
OBNUC 13C  
OBFIN 10404.0 Hz  
POINT 32768  
FREQU 37878.8 Hz  
SCANS 2405  
ACQTM 0.433 sec  
PD 1.567 sec  
PW1 6.0 us  
IRFIN 10157.0 Hz  
IRATN 33  
IRRPW 50 us  
TEMP. 22.0 c  
SLVNT CDCL3  
EXREF 77.00 ppm  
BF 1.50 Hz  
RGAIN 30  
XE 28297.2000 Hz  
XS -3428.9400 Hz

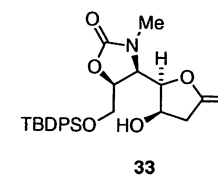

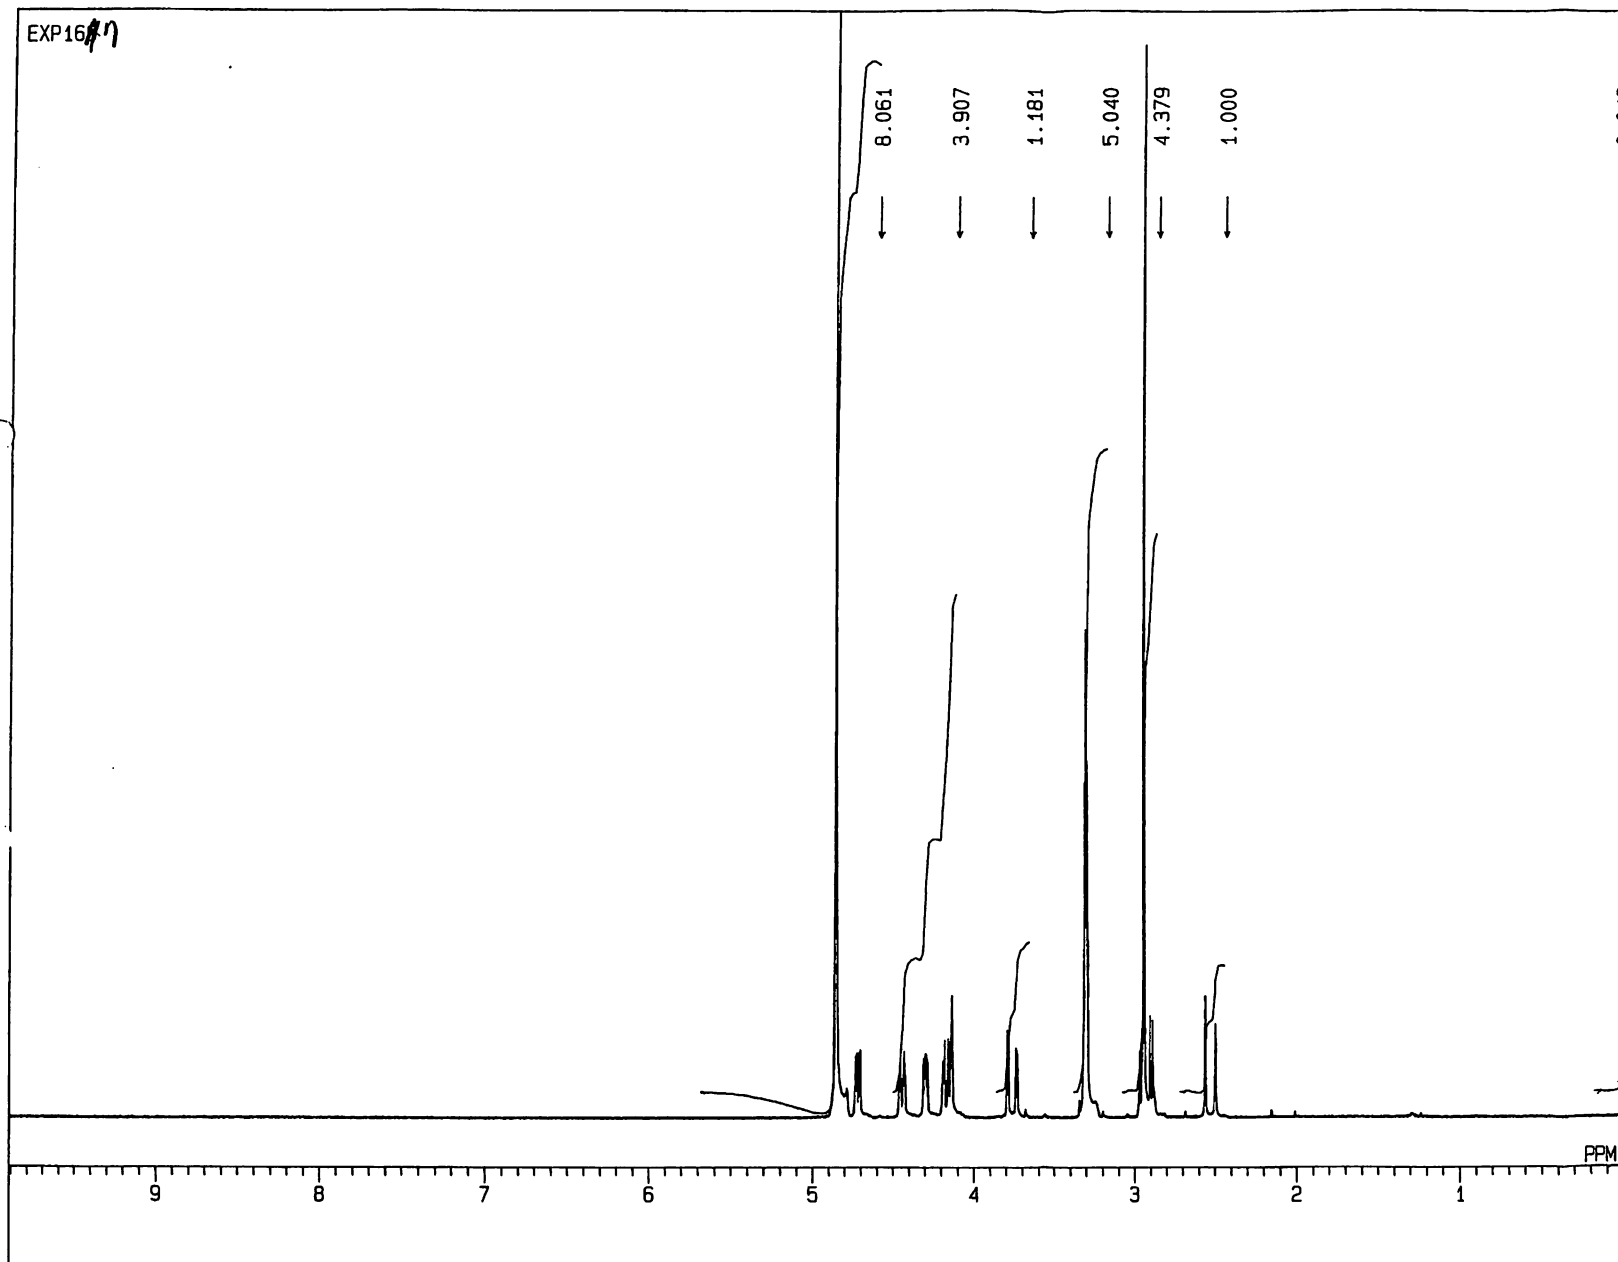

14-FEB-04 18: 21: 05  
DFILE NOESY  
OBNUC 1H  
EXMOD NON  
OFR 270.05 MHz  
OBSET 112.00 kHz  
OBFIN 5800.0 Hz  
POINT 32768  
FREQU 5405.4 Hz  
SCANS 64  
ACQTM 3.031 sec  
PD 3.969 sec  
PW1 5.8 us  
IRNUC 1H  
CTEMP 23.2 c  
SLVNT CD3OD  
EXREF 0.00 ppm  
BF 0.16 Hz  
RGAIN 23  
OPERATOR : \_\_\_\_\_

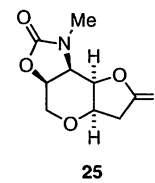

Supplement: c1ob06067h.pdf [file c1ob06067h.pdf]
